# Supplementary material for: Association of Weight Loss Interventions With Changes in Biomarkers of Nonalcoholic Fatty Liver Disease: A Systematic Review and Meta-analysis
Source: PubMed Central journal article supplement (PMC6604126; doi:10.1001/jamainternmed.2019.2248), 2019-07-01
Supplement: jamainternmed-179-1262-s001.pdf [file jamainternmed-179-1262-s001.pdf]

## Supplementary Online Content

Koutoukidis DA, Astbury NM, Tudor KE, et al. Association of weight loss interventions with changes in biomarkers of nonalcoholic fatty liver disease: a systematic review and meta-analysis. *JAMA Intern Med*. Published online July 1, 2019. doi:10.1001/jamainternmed.2019.2248

**eFigure 1** PRISMA Flowchart

**eTable 1** Characteristics of the Interventions of the Included Studies

**eTable 2** Handling of Missing Data in Each Study

**eTable 3** Reported Adverse Events

**eFigure 1.1** Glucose (mmol/L)

**eFigure 1.2** HbA1c (%)

**eFigure 1.3** Insulin Resistance Index (HOMA-IR, QUICKI, or Matsuda)

**eFigure 1.4** Insulin (pmol/L)

**eFigure 1.5** Aspartate Transaminase – AST (U/L)

**eFigure 1.6** Alkaline Phosphatase – ALP (U/L)

**eFigure 1.7**  $\gamma$ -Glutamyl Transferase – GGT (U/L)

**eFigure 1.8** NAFLD Fibrosis Score

**eFigure 1.9** Fatty Liver Index

**eFigure 1.10** Enhanced Liver Fibrosis (ELF) score

**eFigure 1.11** Liver Stiffness (kPa)

**eFigure 1.12** Presence of Definite NASH (Yes/No)

**eFigure 1.13** Inflammation (Score 0-3)

**eFigure 1.14** Ballooning (Score 0-2)

**eFigure 1.15** Fibrosis (Stage F0-F4)

**eFigure 2.1** Weight (kg) (Long-term)

**eFigure 2.2** Glucose (mmol/L) (Long-term)

**eFigure 2.3** HOMA-IR (Long-term)

**eFigure 2.4** Alanine Aminotransferase – ALT (U/L) (Long-term)

**eFigure 2.5** Fatty Liver Index (Long-term)

**eFigure 3.1** Risk of Bias Within Studies

**eFigure 3.2** Funnel Plot of Studies Reporting (a) Alanine Aminotransferase (ALT) and (b) Aspartate Transaminase (AST)

**eFigure 4.1** Weight (kg) (Sensitivity Analysis)

**eFigure 4.2** HOMA-IR (Sensitivity Analysis)

**eFigure 4.3** Glucose (mmol/L) (Sensitivity Analysis)

**eFigure 4.4** Insulin (pmol/L) (Sensitivity Analysis)

**eFigure 4.5** HbA1c (%) (Sensitivity Analysis)

**eFigure 4.6** Alanine Aminotransferase – ALT (U/L) (Sensitivity Analysis)

**eFigure 4.7** Liver Stiffness (kPa) (Sensitivity Analysis)

**eFigure 4.8** Steatosis – Standardized Mean Difference as Assessed by Histologic Examination or MRI (Sensitivity Analysis)

**eFigure 4.9** NAFLD Activity Score (NAS) (Sensitivity Analysis)

**eFigure 4.10** Inflammation (score 0-3) (Sensitivity Analysis)

**eFigure 4.11** Ballooning (score 0-2) (Sensitivity Analysis)

**eFigure 4.12** Fibrosis (scale F0-F4) (Sensitivity Analysis)  
**eFigure 4.13** Aspartate transaminase – AST (U/L) (Sensitivity Analysis)  
**eFigure 4.14** Alkaline phosphatase – ALP (U/L) (Sensitivity Analysis)  
**eFigure 4.15**  $\gamma$ -Glutamyl Transferase – GGT (U/L) (Sensitivity Analysis)  
**eFigure 5.1** Weight (kg) (Subgroup Analysis by the Type of Intervention)  
**eFigure 5.2** Glucose (mmol/L) (Subgroup Analysis by the Type of Intervention)  
**eFigure 5.3** Insulin Resistance Index (HOMA-IR or other) (Subgroup Analysis by the Type of Intervention)  
**eFigure 5.4** Insulin (pmol/L) (Subgroup Analysis by the Type of Intervention)  
**eFigure 5.5** ALT (U/L) (Subgroup Analysis by the Type of Intervention)  
**eFigure 5.6** Steatosis – Standardized Mean Difference as Assessed by Histologic Examination or MRI (Subgroup Analysis by the Type of Intervention)  
**eFigure 5.7** AST (U/L) (Subgroup Analysis by the Type of Intervention)  
**eFigure 6.1** Weight Change (kg) by the Intensity of the Comparator Intervention  
**eFigure 6.2** Glucose (mmol/L) by the Intensity of the Comparator Intervention  
**eFigure 6.3** Insulin Resistance Indices by the Intensity of the Comparator Intervention  
**eFigure 6.4** Insulin (pmol/L) by the Intensity of the Comparator Intervention  
**eFigure 6.5** ALT (U/L) by the Intensity of the Comparator Intervention  
**eFigure 6.6** AST (U/L) by the Intensity of the Comparator Intervention  
**eFigure 6.7** Steatosis by the Intensity of the Comparator Intervention  
**eFigure 7.1** Weight loss by the Presence of a Minimum Overweight/Obesity Cut-off  
**eFigure 7.2** Glucose (mmol/L) by the Presence of a Minimum Overweight/Obesity Cut-off  
**eFigure 7.3** Insulin Resistance Index (HOMA-IR or Other) by the Presence of a Minimum Overweight/Obesity Cut-off  
**eFigure 7.4** Insulin (pmol/L) by the Presence of a Minimum Overweight/Obesity Cut-off  
**eFigure 7.5** ALT (U/L) by the Presence of a Minimum Overweight/Obesity Cut-off  
**eFigure 7.6** AST (U/L) by the Presence of a Minimum Overweight/Obesity Cut-off  
**eFigure 7.7** Steatosis (Standardized Mean Difference as Assessed by Histologic Examination, MRI, or Ultrasonography) by the Presence of a Minimum Overweight/Obesity Cut-off  
**eFigure 8.1** Fibrosis (Stage F0-F4)  
**eMethods** Search Strategy

This supplementary material has been provided by the authors to give readers additional information about their work.

eFigure 1 PRISMA flowchart

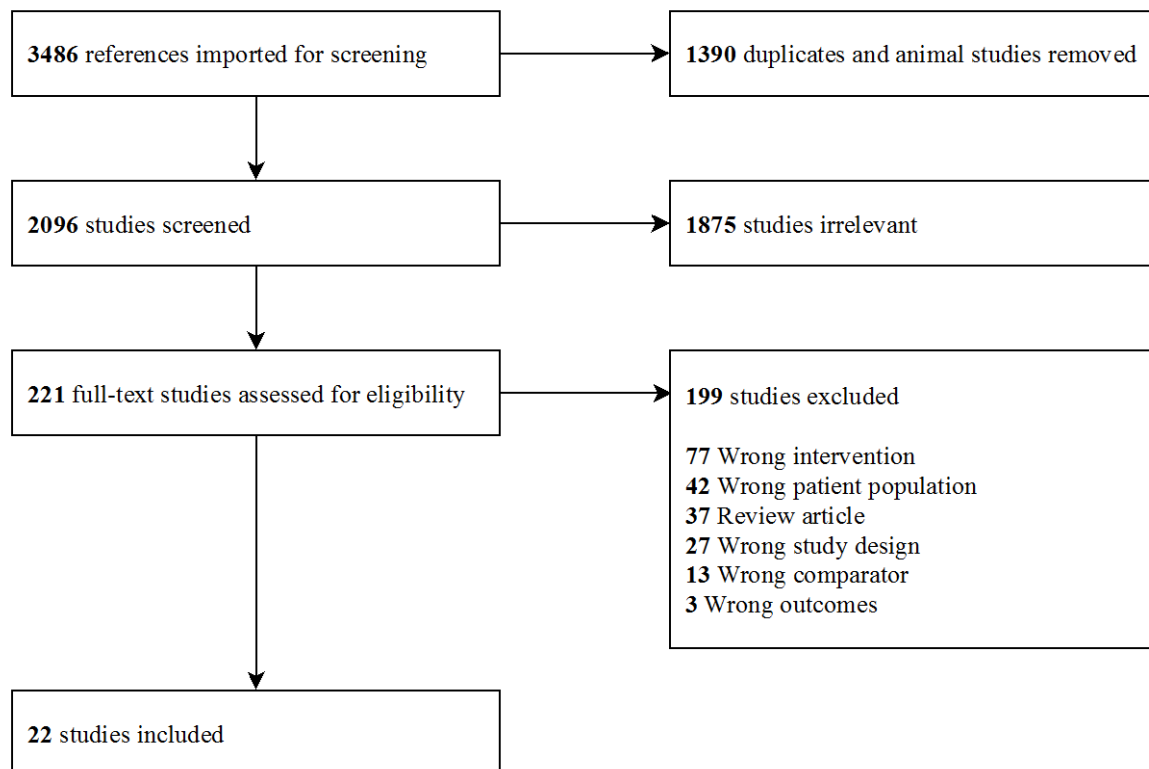

eTable 1 Characteristics of the interventions of the included studies

| Study and country      | Intervention                                                                                                                                                   | Provider                                      | Delivery and Intensity                                                      | Duration   | Comparison                                                                                                               |
|------------------------|----------------------------------------------------------------------------------------------------------------------------------------------------------------|-----------------------------------------------|-----------------------------------------------------------------------------|------------|--------------------------------------------------------------------------------------------------------------------------|
| Dong, 2016, China      | Diet: 25-30kcal/kg/d if at least overweight, avoid greasy food<br><br>Exercise: advice for aerobic 3-4x 30-60min/wk                                            | Dietitian and exercise physiologist           | Phone, 10minutes thi-monthly                                                | 2 years    | Usual care                                                                                                               |
| Sun, 2012, China       | Diet: 25kcal/kg/day, low-fat, low-sugar, optimized mixed diet<br><br>Exercise: advice to increase PA (23METs/h/wk) and exercise therapy (4METs/h/wk)           | Physicians, hygienists, dietitians and nurses | Unclear                                                                     | 1 year     | Basic healthy eating/exercise/weight loss advice                                                                         |
| Wong, 2013, Hong Kong  | Diet: hypoenergetic, low-fat, low-GI, varied, meal plans, and booklets<br><br>Exercise: advice for 3-5x 30min/wk                                               | Dietitian and exercise instructor             | Face-to-face, individual, weekly for months 0-4 and monthly for months 5-12 | 1 year     | Basic healthy eating/exercise/weight loss advice (Advice to reduce carbohydrate and fat intake and exercise 3x 30min/wk) |
| Cheng, 2017, China     | Diet: 300-500kcal deficit/day if at least with overweight, low-carbohydrate with prepared meals<br><br>Exercise: aerobic 2-3 times/wk, progressively increased | Nutritionist and exercise researcher          | Face-to-face, 3x nutrition meetings, 2-3 exercise classes/week              | 8.6 months | Usual care: Maintain ordinary lifestyle                                                                                  |
| Abenavoli, 2017, Italy | Diet: 1400-1600kcal/d, Mediterranean<br><br>Exercise: advice for daily physical activity                                                                       | Unclear                                       | Telephone, monthly                                                          | 6 months   | Usual care: Only monitored with the medical indication for weight loss                                                   |
| Axley, 2017, USA       | Diet and exercise                                                                                                                                              | Automated                                     | Text messaging. 6x weekly                                                   | 6 months   | Basic healthy lifestyle/weight loss instructions                                                                         |
| Eckard, 2013, USA      | Arm 1: Diet: low-fat<br>Arm 2: Diet: moderate-fat and low-processed-carbohydrate                                                                               | Dietitian and exercise physiologist           | Face-to-face, bi-monthly (diet)                                             | 6 months   | Basic healthy eating/exercise/weight loss advice                                                                         |

|                                 |                                                                                                                                                                              |                                       |                                                                            |                                      |                                                             |
|---------------------------------|------------------------------------------------------------------------------------------------------------------------------------------------------------------------------|---------------------------------------|----------------------------------------------------------------------------|--------------------------------------|-------------------------------------------------------------|
|                                 | Diet (both arms): 500kcal deficit/day, received measuring cups and spoons and booklets<br><br>Exercise (both arms): 1 class, log, pedometer and advice for -4-7x 20-60min/wk |                                       |                                                                            |                                      |                                                             |
| Promrat, 2010, USA              | Diet: 1000-1500kcal/day, low-fat, meal replacements, meal plan, based on DPP<br><br>Exercise: pedometer, log, advice for $\geq 200$ min/wk or 10,000steps/day                | Nutritionist or health educator       | Face to face, group, weekly for months 0-6 and biweekly for months 7-12    | 1 year (48 wk's)                     | Basic healthy lifestyle/weight loss instructions            |
| Katsagoni, 2018, Greece         | Diet: 1500-1800kcal/day, Mediterranean<br><br>Exercise (for exercise group only): advice for 30min/day (also: advice for optimal sleep duration, and mid-day rest)           | Dietitian                             | Face-to-face, group, fortnightly for months 0-2 and monthly for months 3-6 | 6 months                             | Minimal intervention                                        |
| AbdEl-Kader, 2016, Saudi Arabia | Diet: 1200kcal/d, balanced<br><br>Exercise: aerobic 3x 30min/wk on treadmill                                                                                                 | Dietitians                            | Unclear                                                                    | 3 months                             | Usual care: Maintain ordinary lifestyle                     |
| Al-Jiffri, 2013, Saudi Arabia   | Diet: 1200kcal/d, balanced<br><br>Exercise: aerobic 3x30min/wk on treadmill                                                                                                  | Dietitians                            | Unclear                                                                    | Diet: 2 months<br>Exercise: 3 months | Usual care: No intervention                                 |
| Asghari, 2018, Iran             | Diet: 500-1000kcal deficit/day, healthy                                                                                                                                      | Nutritionist                          | Face to face, biweekly                                                     | 3 months                             | Placebo<br>Basic healthy lifestyle/weight loss instructions |
| St. George, 2009, Australia     | Diet: 400-570kcal deficit/day, low in saturated fat and processed food, high in n-3 and fiber<br><br>Exercise: advice for (mainly walking) $\geq 200$ min/wk                 | Dietitians and exercise physiologists | Face-to-face, individual,<br><br>Low-intensity arm: 3x fortnightly         | 3 months                             | Basic healthy lifestyle/weight loss instructions            |

|                           |                                                                                                                                      |                                      |                                                               |                                               |                                                                                       |
|---------------------------|--------------------------------------------------------------------------------------------------------------------------------------|--------------------------------------|---------------------------------------------------------------|-----------------------------------------------|---------------------------------------------------------------------------------------|
|                           |                                                                                                                                      |                                      | Moderate-intensity arm: 6x fortnightly                        |                                               |                                                                                       |
| Lim, 2018, Singapore      | Diet and exercise counselling for weight loss plus mobile app                                                                        | Mobile app (unclear for counselling) | Unclear                                                       | Unclear                                       | Diet and exercise counselling                                                         |
| Selezneva, 2014, Russia   | Diet: 1600-1700kcal/day                                                                                                              | Unclear                              | Unclear                                                       | 1 month                                       | Iso-caloric diet: 2500-2700kcal/day                                                   |
| Armstrong, 2016, UK       | Liraglutide: 1.8mg<br>Standard recommendations for lifestyle modification                                                            | N/A                                  | Subcutaneous injections, daily                                | 12 months (48 wk's)                           | Placebo<br>Standard recommendations for lifestyle modification                        |
| Khoo, 2017, Singapore     | Liraglutide: 0.6mg and progressively increased to 3mg by 4 <sup>th</sup> week                                                        | N/A                                  | Subcutaneous injections, daily                                | 6 months                                      | Diet: 400kcal deficit/day<br>Exercise: advice for moderate-intensity 5-7x 30-60min/wk |
| Harrison, 2007, USA       | Orlistat: 120mg<br>Diet: 1400kcal/day<br>Exercise: non-specific advice to increase PA                                                | Research nurse and physician         | Orlistat: 3x daily<br>Diet: Face-to-face                      | Orlistat: 9 months (36 wk's)<br>Diet: 1 month | Diet (as per the intervention group)                                                  |
| Ye, 2017, NR              | Orlistat: 120mg                                                                                                                      | N/A                                  | 3x daily                                                      | 6 months                                      | Placebo                                                                               |
| Zelber-Sagi, 2004, Israel | Orlistat: 120mg<br>Diet: 25kcal/kg/day, low-fat, low in simple carbohydrates, balanced<br>Exercise: advice for walking 3-4x 40min/wk | Nutritionist                         | Orlistat: 3x daily<br>Diet: Face-to-face, individual, monthly | 6 months                                      | Placebo<br>Diet and exercise (as per the intervention group)                          |

|                                 |                                                                                              |                               |                                     |          |                                                                   |
|---------------------------------|----------------------------------------------------------------------------------------------|-------------------------------|-------------------------------------|----------|-------------------------------------------------------------------|
| Bahmanadabi, 2011, Iran         | Sibutramine: 15mg<br>Diet: low-calorie                                                       | Unclear                       | Sibutramine: daily<br>Diet: Unclear | 3 months | Diet: low-calorie                                                 |
| Lee, 2012, Singapore            | Gastric balloon<br>Diet: 1200-1500kcal/day<br>Exercise: advice for walking/jogging 30min/day | Dietitian and physiotherapist | Monthly                             | 6 months | Sham surgery<br>Diet and exercise (as per the intervention group) |
| PA: physical activity, wk: week |                                                                                              |                               |                                     |          |                                                                   |

eTable 2 Additional study characteristics

| Study and country                                                          | Age (years) | BMI (kg/m <sup>2</sup> ) | Type 2 Diabetes | Hypertension |
|----------------------------------------------------------------------------|-------------|--------------------------|-----------------|--------------|
| Dong, 2016, China                                                          | 57 ± 6      | 25.8 ± 2.7               | 0%              | NR           |
| Sun, 2012, China                                                           | 39 ± 15     | 37.9 ± 14.3              | 6%              | NR           |
| Wong, 2013, Hong Kong                                                      | 51 ± 9      | 25.4 ± 3.6               | 8%              | 29%          |
| Cheng, 2017, China                                                         | 60 ± 4      | 26.7 ± 2.8               | 0%              | NR           |
| Abenavoli, 2017, Italy                                                     | 45 ± 13     | 30.3 ± 3.1               | 0%              | 0%           |
| Axley, 2017, USA                                                           | 53 ± 9      | 37.3 ± 8.2               | 33%             | NR           |
| Eckard, 2013, USA                                                          | 50 ± 10     | 35.7 ± 6.6               | 19%             | 56%          |
| Promrat, 2010, USA                                                         | 48 ± 11     | 33.6 ± 5                 | 48%             | NR           |
| Katsagoni, 2018, Greece                                                    | 46 ± 14     | 31.4 ± 4.4               | 0%              | NR           |
| AbdEl-Kader, 2016, Saudi Arabia                                            | 51 ± 6      | 32.1 ± 2.7               | NR              | NR           |
| Al-Jiffri, 2013, Saudi Arabia                                              | NR          | 32.2 ± 3.7               | 100%            | 0%           |
| Asghari, 2018, Iran                                                        | 40 ± 6      | 30.9 ± 3.4               | 0%              | NR           |
| StGeorge, 2009, Australia                                                  | 48 ± 11     | 31.7 ± 5.3               | 19%             | 66%          |
| Lim, 2018, Singapore                                                       | NR          | NR                       | NR              | NR           |
| Selezneva, 2014, Russia                                                    | 41 ± 2      | 37.1 ± 1.8               | NR              | NR           |
| Armstrong, 2016, UK                                                        | 51 ± 11     | 36 ± 5.7                 | 33%             | 56%          |
| Khoo, 2017, Singapore                                                      | 41 ± 9      | 33.1 ± 3.5               | 0%              | 0%           |
| Harrison, 2007, USA                                                        | 47 ± 9      | 36.4 ± 6.2               | 10%             | NR           |
| Ye, 2017, NR                                                               | NR          | 28.9 ± 3.8               | NR              | NR           |
| Zelber-Sagi, 2004, Israel                                                  | 48 ± 10     | 33.1 ± 5.6               | 8%              | NR           |
| Bahmanadabi, 2011, Iran                                                    | 38 ± 7      | 35.1 ± 7.3               | 0%              | 0%           |
| Lee, 2012, Singapore                                                       | 45 ± 17     | 31.5 ± 7.6               | 11%             | NR           |
| Data are reported as mean ± SD or proportion of total N. NR: Not reported. |             |                          |                 |              |



eTable 3 Handing of missing data in each study

| Study                  | Year | Total N randomized | N analyzed | Missing data handling                                                                                                                               |
|------------------------|------|--------------------|------------|-----------------------------------------------------------------------------------------------------------------------------------------------------|
| Dong                   | 2016 | 280                | 260        | Complete case analysis                                                                                                                              |
| Sun                    | 2012 | 1087               | 1006       | Complete case analysis                                                                                                                              |
| Wong                   | 2013 | 154                | 154        | Missing data - last observation carried forward                                                                                                     |
| Cheng <sup>1</sup>     | 2017 | 86                 | 86         | Missing data - multiple imputation and reporting of marginal means                                                                                  |
| Abenavoli <sup>1</sup> | 2017 | 30                 | 30         | No missing data                                                                                                                                     |
| Axley                  | 2017 | 30                 | 22         | Missing data - no information on imputation – assumed complete case analysis                                                                        |
| Eckard                 | 2013 | 32                 | 32         | Complete case analysis                                                                                                                              |
| Promrat                | 2008 | 31                 | 30         | Complete case analysis                                                                                                                              |
| Katsagoni              | 2018 | 63                 | 63         | Missing data - multiple imputation                                                                                                                  |
| AbdEl-Kader            | 2016 | 100                | 100        | No information – assumed 100% follow-up rate                                                                                                        |
| Al-Jiffri              | 2013 | 100                | 100        | No missing data                                                                                                                                     |
| Asghari <sup>1</sup>   | 2018 | 60                 | 60         | Missing data – imputation (personal communication)                                                                                                  |
| StGeorge               | 2009 | 152                | 143        | Complete case analysis                                                                                                                              |
| Lim                    | 2018 | 86                 | 86         | Complete case analysis - INTERIM                                                                                                                    |
| Selezneva              | 2014 | 174                | 174        | No information – assumed 100% follow-up rate                                                                                                        |
| Armstrong              | 2016 | 52                 | 45         | Complete case analysis                                                                                                                              |
| Khoo                   | 2017 | 30                 | 24         | Complete case analysis                                                                                                                              |
| Harrison               | 2007 | 41                 | 41         | Complete case analysis                                                                                                                              |
| Ye                     | 2017 | 30                 | 30         | Complete case analysis - INTERIM                                                                                                                    |
| Zelber-Sagi            | 2004 | 52                 | 44         | Missing data – complete case analysis in tables but mentions last observation carried forward in the statistical section                            |
| Bahmanabadi            | 2011 | 40                 | 40         | Unclear followed up rate – manuscript mentions that those with low adherence were excluded but unclear how many these were – assumed 100% follow-up |
| Lee                    | 2009 | 18                 | 18         | Complete case analysis                                                                                                                              |

<sup>1</sup> Numbers exclude participants in trial arms that were not included in the current review

eTable 4 Reported adverse events

| Study and country               | Adverse events in the intervention group                                                                                                                                                                                                                                                                                                                                                                                                                                                                                                                                                                                                                                                                                                                                                                                           | Adverse events in the control group                                                                                                                                                                                                                                                                                                                                                                                                                                                                                                                                                                                                                                                                                                                                                                                                                                                                 |
|---------------------------------|------------------------------------------------------------------------------------------------------------------------------------------------------------------------------------------------------------------------------------------------------------------------------------------------------------------------------------------------------------------------------------------------------------------------------------------------------------------------------------------------------------------------------------------------------------------------------------------------------------------------------------------------------------------------------------------------------------------------------------------------------------------------------------------------------------------------------------|-----------------------------------------------------------------------------------------------------------------------------------------------------------------------------------------------------------------------------------------------------------------------------------------------------------------------------------------------------------------------------------------------------------------------------------------------------------------------------------------------------------------------------------------------------------------------------------------------------------------------------------------------------------------------------------------------------------------------------------------------------------------------------------------------------------------------------------------------------------------------------------------------------|
| Dong, 2016, China               | None                                                                                                                                                                                                                                                                                                                                                                                                                                                                                                                                                                                                                                                                                                                                                                                                                               | None                                                                                                                                                                                                                                                                                                                                                                                                                                                                                                                                                                                                                                                                                                                                                                                                                                                                                                |
| Sun, 2012, China                | Unclear                                                                                                                                                                                                                                                                                                                                                                                                                                                                                                                                                                                                                                                                                                                                                                                                                            | Unclear                                                                                                                                                                                                                                                                                                                                                                                                                                                                                                                                                                                                                                                                                                                                                                                                                                                                                             |
| Wong, 2013, Hong Kong           | Unclear                                                                                                                                                                                                                                                                                                                                                                                                                                                                                                                                                                                                                                                                                                                                                                                                                            | Unclear                                                                                                                                                                                                                                                                                                                                                                                                                                                                                                                                                                                                                                                                                                                                                                                                                                                                                             |
| Cheng, 2017, China              | Unclear                                                                                                                                                                                                                                                                                                                                                                                                                                                                                                                                                                                                                                                                                                                                                                                                                            | Unclear                                                                                                                                                                                                                                                                                                                                                                                                                                                                                                                                                                                                                                                                                                                                                                                                                                                                                             |
| Abenavoli, 2017, Italy          | None                                                                                                                                                                                                                                                                                                                                                                                                                                                                                                                                                                                                                                                                                                                                                                                                                               | None                                                                                                                                                                                                                                                                                                                                                                                                                                                                                                                                                                                                                                                                                                                                                                                                                                                                                                |
| Axley, 2017, USA                | None                                                                                                                                                                                                                                                                                                                                                                                                                                                                                                                                                                                                                                                                                                                                                                                                                               | None                                                                                                                                                                                                                                                                                                                                                                                                                                                                                                                                                                                                                                                                                                                                                                                                                                                                                                |
| Eckard, 2013, USA               | Unclear                                                                                                                                                                                                                                                                                                                                                                                                                                                                                                                                                                                                                                                                                                                                                                                                                            | Unclear                                                                                                                                                                                                                                                                                                                                                                                                                                                                                                                                                                                                                                                                                                                                                                                                                                                                                             |
| Promrat, 2010, USA              | None                                                                                                                                                                                                                                                                                                                                                                                                                                                                                                                                                                                                                                                                                                                                                                                                                               | None                                                                                                                                                                                                                                                                                                                                                                                                                                                                                                                                                                                                                                                                                                                                                                                                                                                                                                |
| Katsagoni, 2018, Greece         | None                                                                                                                                                                                                                                                                                                                                                                                                                                                                                                                                                                                                                                                                                                                                                                                                                               | None                                                                                                                                                                                                                                                                                                                                                                                                                                                                                                                                                                                                                                                                                                                                                                                                                                                                                                |
| AbdEl-Kader, 2016, Saudi Arabia | Unclear                                                                                                                                                                                                                                                                                                                                                                                                                                                                                                                                                                                                                                                                                                                                                                                                                            | Unclear                                                                                                                                                                                                                                                                                                                                                                                                                                                                                                                                                                                                                                                                                                                                                                                                                                                                                             |
| Al-Jiffri, 2013, Saudi Arabia   | None                                                                                                                                                                                                                                                                                                                                                                                                                                                                                                                                                                                                                                                                                                                                                                                                                               | None                                                                                                                                                                                                                                                                                                                                                                                                                                                                                                                                                                                                                                                                                                                                                                                                                                                                                                |
| Asghari, 2018, Iran             | None                                                                                                                                                                                                                                                                                                                                                                                                                                                                                                                                                                                                                                                                                                                                                                                                                               | None                                                                                                                                                                                                                                                                                                                                                                                                                                                                                                                                                                                                                                                                                                                                                                                                                                                                                                |
| St. George, 2009, Australia     | Unclear                                                                                                                                                                                                                                                                                                                                                                                                                                                                                                                                                                                                                                                                                                                                                                                                                            | Unclear                                                                                                                                                                                                                                                                                                                                                                                                                                                                                                                                                                                                                                                                                                                                                                                                                                                                                             |
| Lim, 2018, Singapore            | Unclear                                                                                                                                                                                                                                                                                                                                                                                                                                                                                                                                                                                                                                                                                                                                                                                                                            | Unclear                                                                                                                                                                                                                                                                                                                                                                                                                                                                                                                                                                                                                                                                                                                                                                                                                                                                                             |
| Selezneva, 2014, Russia         | Unclear                                                                                                                                                                                                                                                                                                                                                                                                                                                                                                                                                                                                                                                                                                                                                                                                                            | Unclear                                                                                                                                                                                                                                                                                                                                                                                                                                                                                                                                                                                                                                                                                                                                                                                                                                                                                             |
| Armstrong, 2016, UK             | <p>% serious AEs: 8%<br/>% any AE: 88%</p> <p>AEs included: gastrointestinal disorders, nausea, diarrhea, abdominal pain, vomiting, constipation, dyspepsia, flatulence, bloating, eye disorders, cardiac disorders, general disorders and administration site conditions, injection site reaction, fatigue, influenza-like symptoms, peripheral edema, chills, non-specific pain, infections and infestations, investigations, increased aspartate aminotransferase, metabolism and nutrition disorders, anorexia (loss of appetite), musculoskeletal and connective disorders 8, back pain, arthralgia, nervous system disorders, dizziness, headaches or migraines, psychiatric disorders, depression, renal and urinary disorders, respiratory, thoracic, and mediastinal disorders, cough, skin and soft tissue disorders</p> | <p>% serious AEs: 8%<br/>% any AE: 92%</p> <p>AEs included: gastrointestinal disorders, nausea, diarrhea, abdominal pain, vomiting, dyspepsia, eye disorders, cardiac disorders, general disorders and administration site conditions, injection site reaction, fatigue, influenza-like symptoms, peripheral edema, non-specific pain, infections and infestations, chest infection, urinary tract infection, investigations, increased <math>\gamma</math>-glutamyl transferase, increased aspartate aminotransferase, metabolism and nutrition disorders, anorexia (loss of appetite), musculoskeletal and connective disorders 8, back pain, arthralgia, muscle cramps, nervous system disorders, dizziness, headaches or migraines, psychiatric disorders, depression, renal and urinary disorders, respiratory, thoracic, and mediastinal disorders, cough, skin and soft tissue disorders</p> |
| Khoo, 2017, Singapore           | AEs included: Nausea, transient abdominal discomfort and bloating, injection site reaction                                                                                                                                                                                                                                                                                                                                                                                                                                                                                                                                                                                                                                                                                                                                         | None                                                                                                                                                                                                                                                                                                                                                                                                                                                                                                                                                                                                                                                                                                                                                                                                                                                                                                |
| Harrison, 2007, USA             | Unclear                                                                                                                                                                                                                                                                                                                                                                                                                                                                                                                                                                                                                                                                                                                                                                                                                            | Unclear                                                                                                                                                                                                                                                                                                                                                                                                                                                                                                                                                                                                                                                                                                                                                                                                                                                                                             |
| Ye, 2017, NR                    | Unclear                                                                                                                                                                                                                                                                                                                                                                                                                                                                                                                                                                                                                                                                                                                                                                                                                            | Unclear                                                                                                                                                                                                                                                                                                                                                                                                                                                                                                                                                                                                                                                                                                                                                                                                                                                                                             |
| Zelber-Sagi, 2004, Israel       | AEs included: Gastrointestinal disorders                                                                                                                                                                                                                                                                                                                                                                                                                                                                                                                                                                                                                                                                                                                                                                                           | AEs included: Gastrointestinal disorders                                                                                                                                                                                                                                                                                                                                                                                                                                                                                                                                                                                                                                                                                                                                                                                                                                                            |
| Bahmanadabi, 2011, Iran         | Unclear                                                                                                                                                                                                                                                                                                                                                                                                                                                                                                                                                                                                                                                                                                                                                                                                                            | Unclear                                                                                                                                                                                                                                                                                                                                                                                                                                                                                                                                                                                                                                                                                                                                                                                                                                                                                             |

|                      |                                               |                                               |
|----------------------|-----------------------------------------------|-----------------------------------------------|
| Lee, 2012, Singapore | AEs included: Epigastric discomfort, vomiting | AEs included: Epigastric discomfort, vomiting |
|----------------------|-----------------------------------------------|-----------------------------------------------|

# 1 Additional outcomes for the main analysis

eFigure 1.1 Glucose (mmol/L)

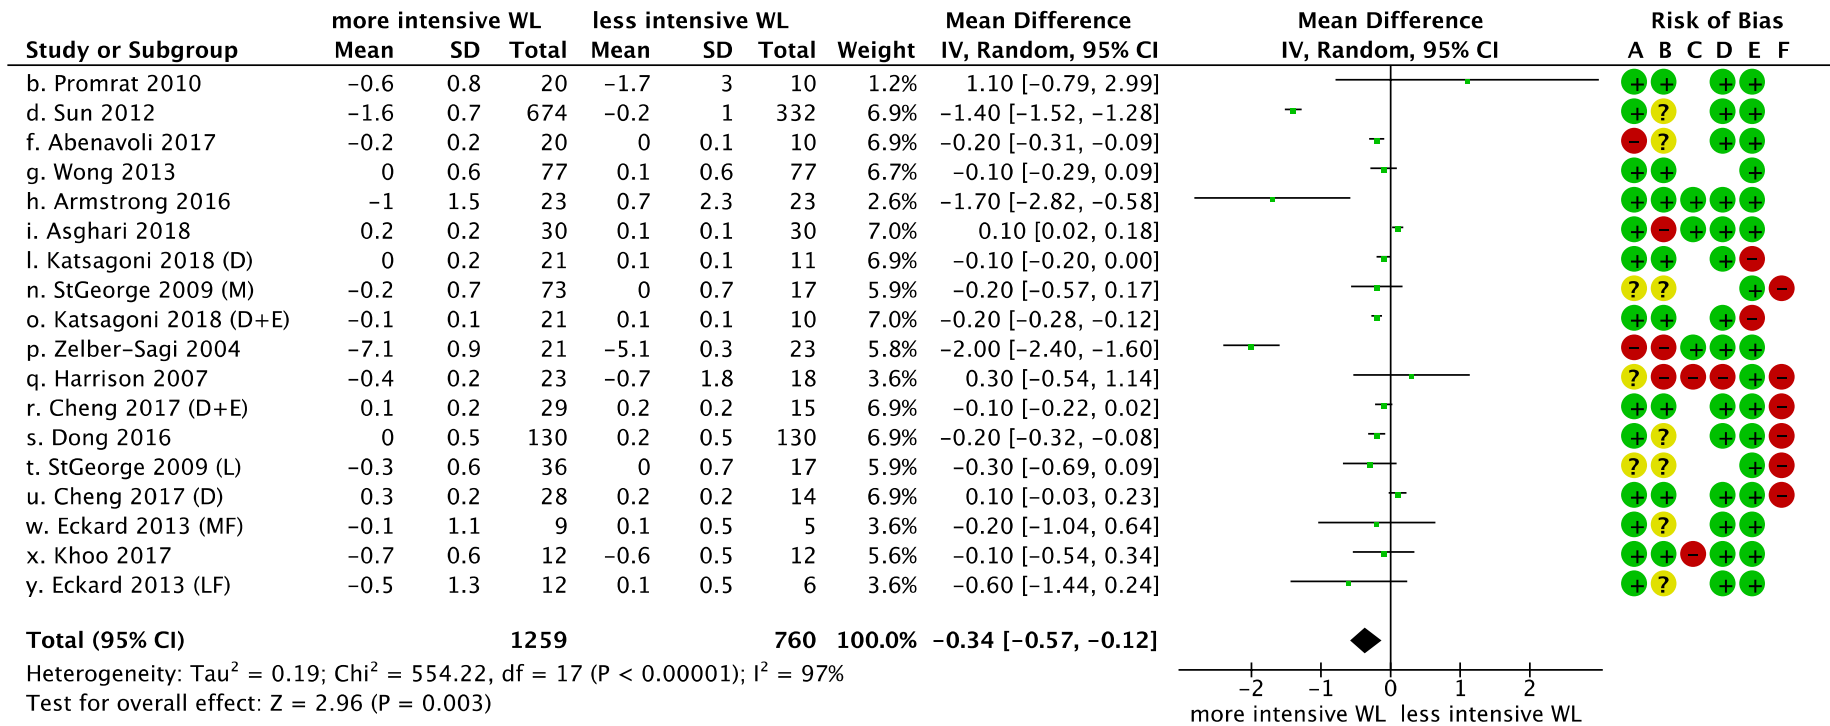

## Risk of bias legend for all forest plots

- (A) Random sequence generation (selection bias)
- (B) Allocation concealment (selection bias)
- (C) Blinding of participants and personnel (performance bias)
- (D) Blinding of subjective outcome assessment
- (E) Incomplete outcome data (attrition bias)
- (F) Other bias

eFigure 1.2 HbA1c (%)

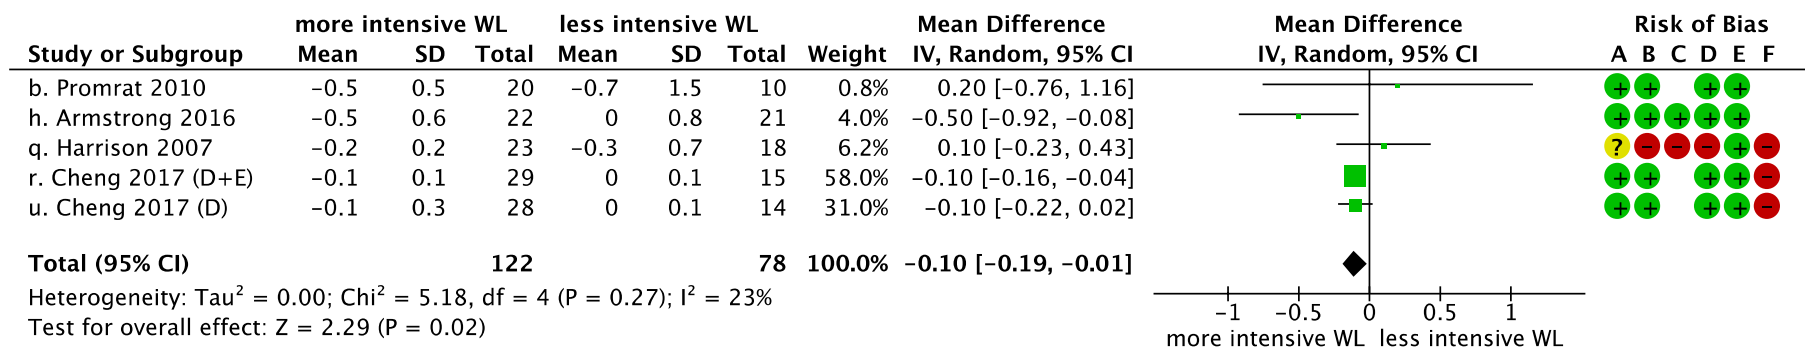

eFigure 1.3 Insulin resistance index (HOMA-IR, QUICKI, or Matsuda)

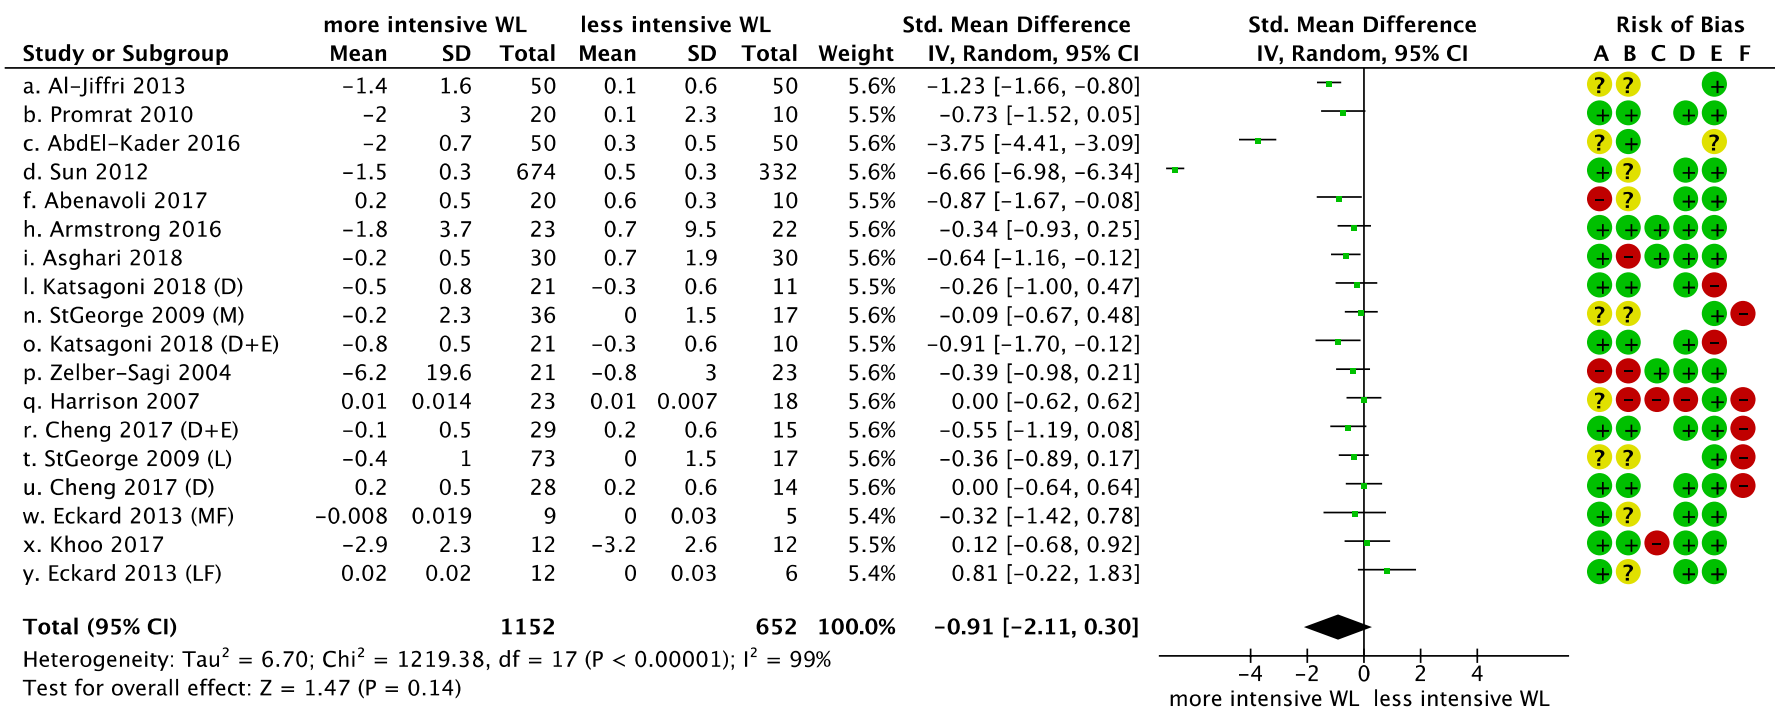

eFigure 1.4 Insulin (pmol/L)

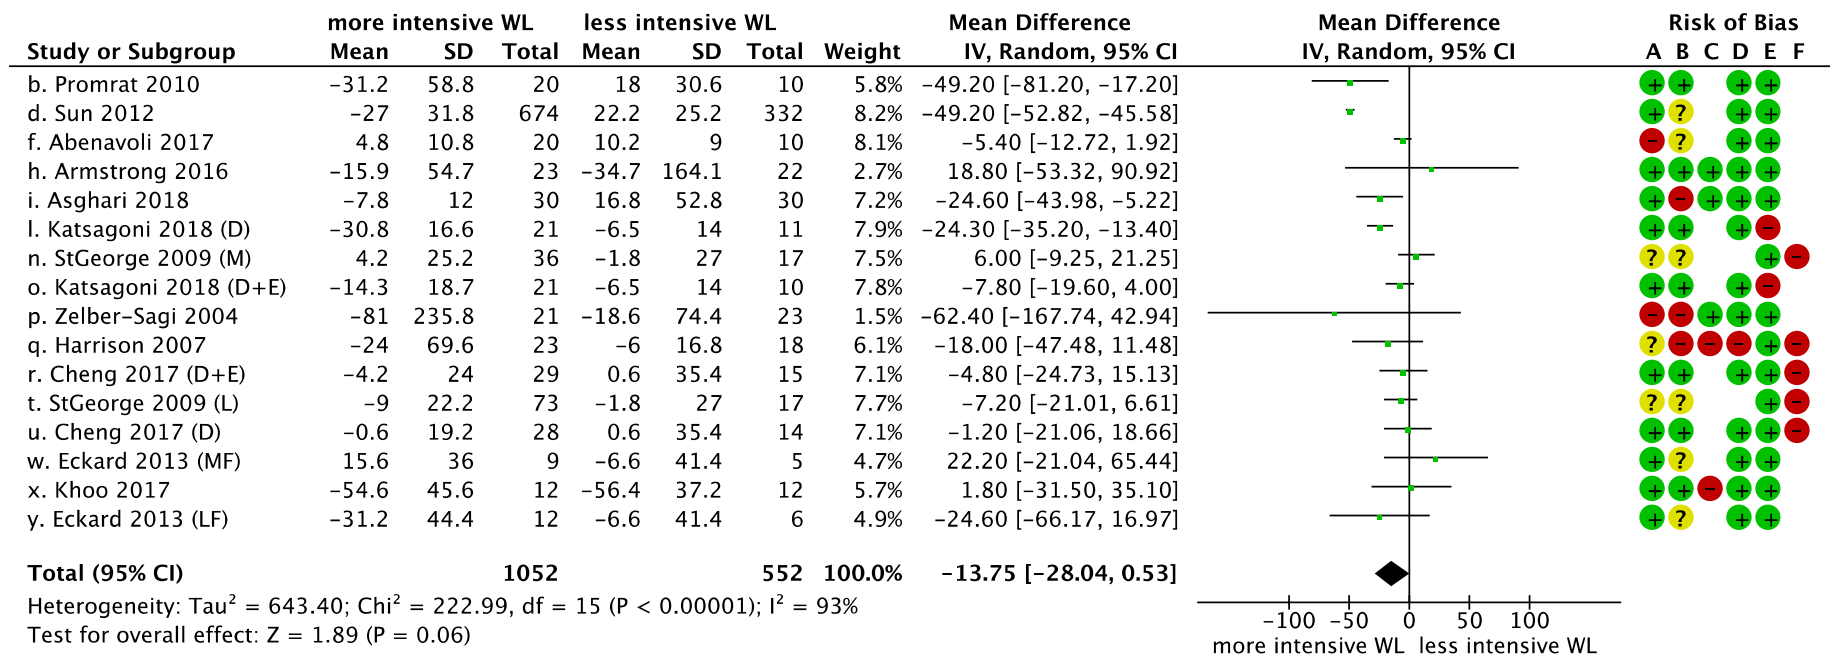

eFigure 1.5 Aspartate transaminase – AST (U/L)

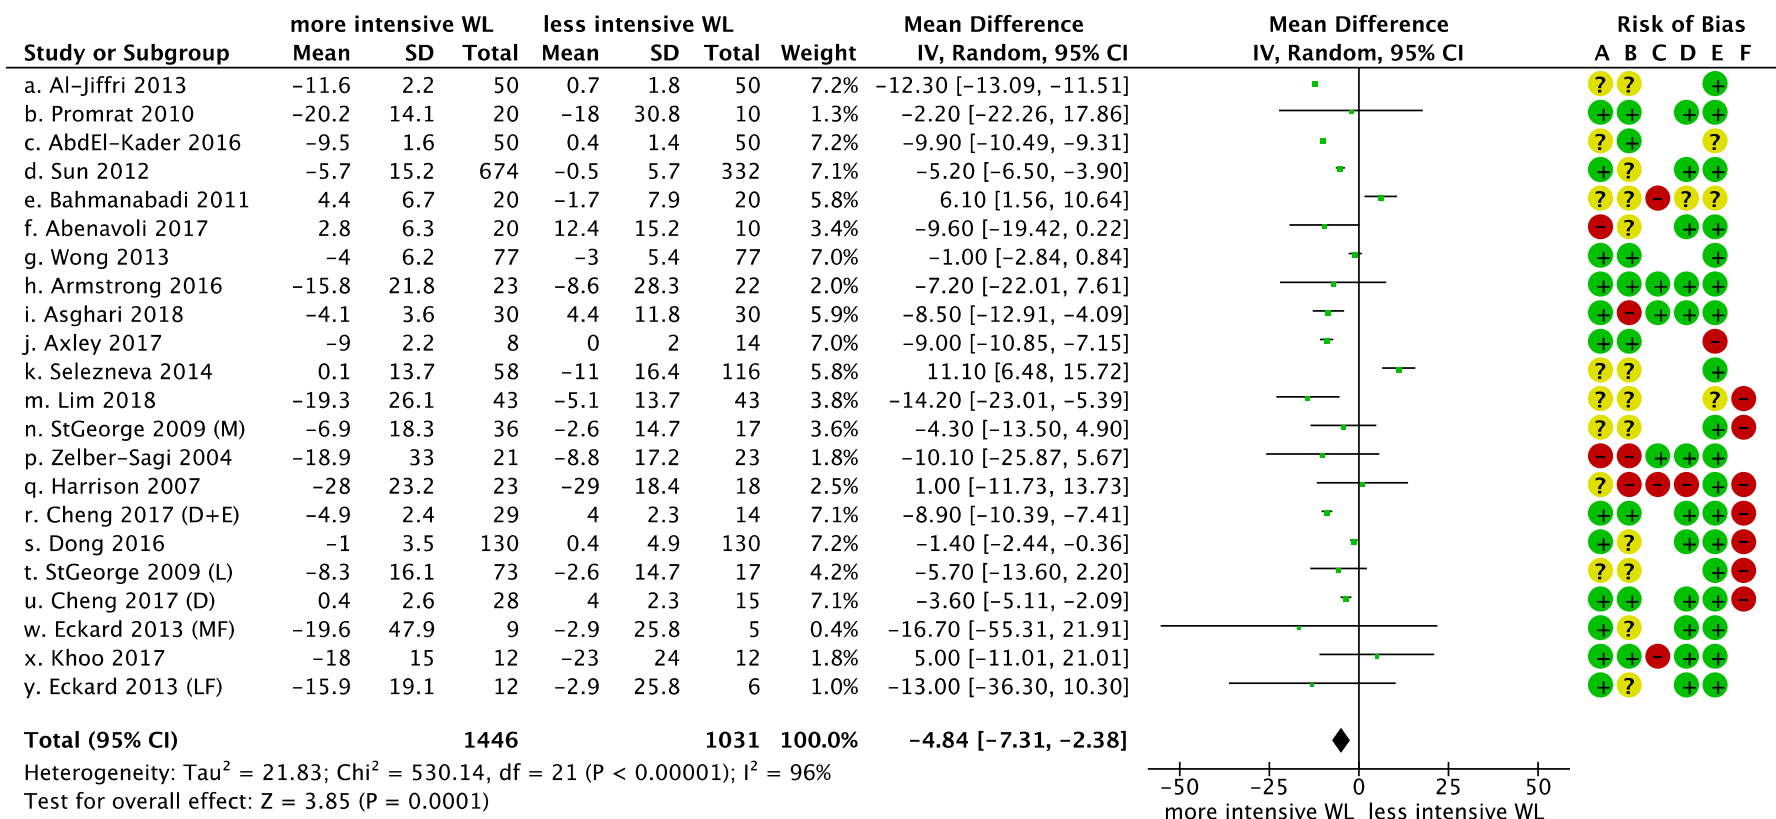



eFigure 1.6 Alkaline phosphatase – ALP (U/L)

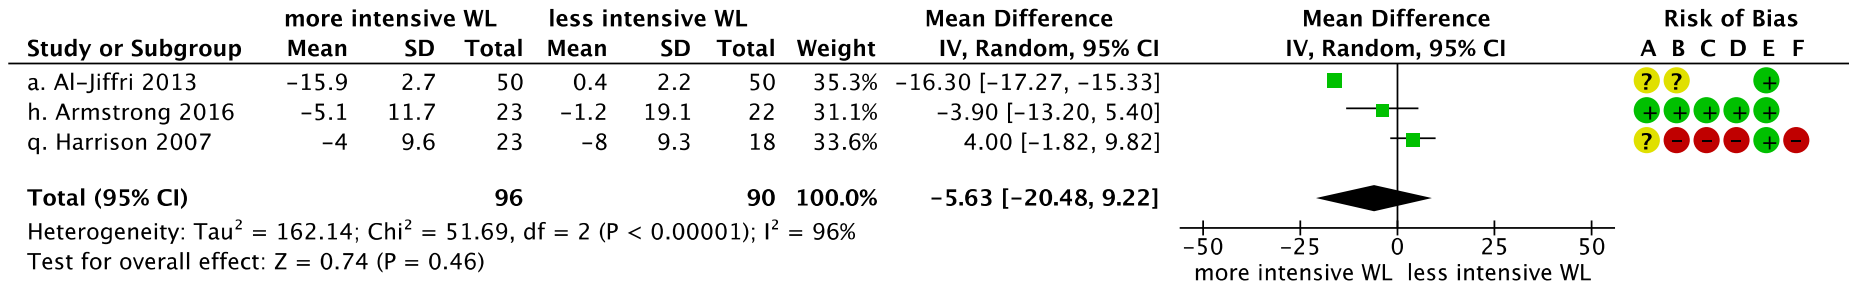

eFigure 1.7 γ-glutamyl transferase – GGT (U/L)

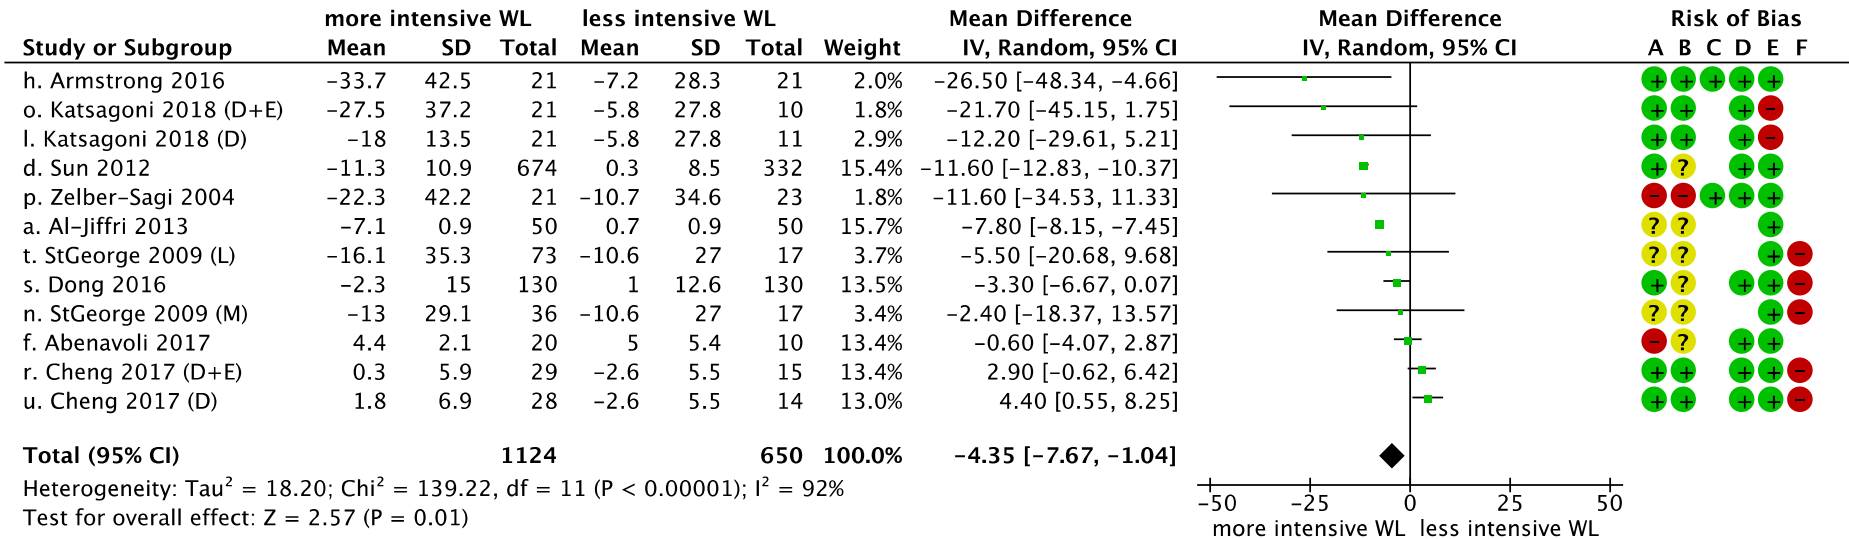

eFigure 1.8 NAFLD Fibrosis score

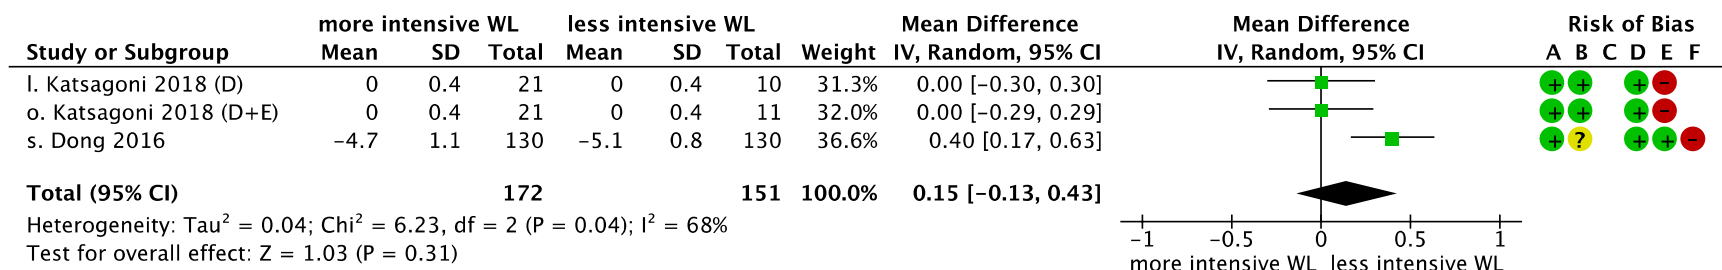

eFigure 1.9 Fatty liver index

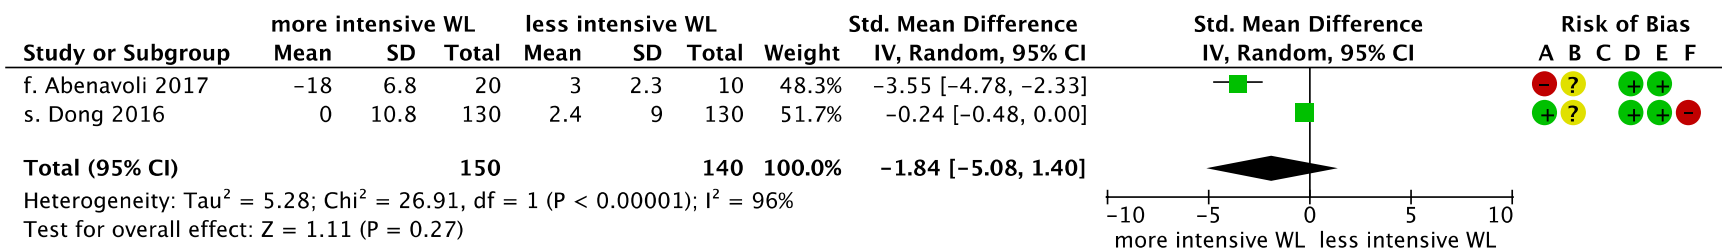

eFigure 1.10 Enhanced liver fibrosis (ELF) score

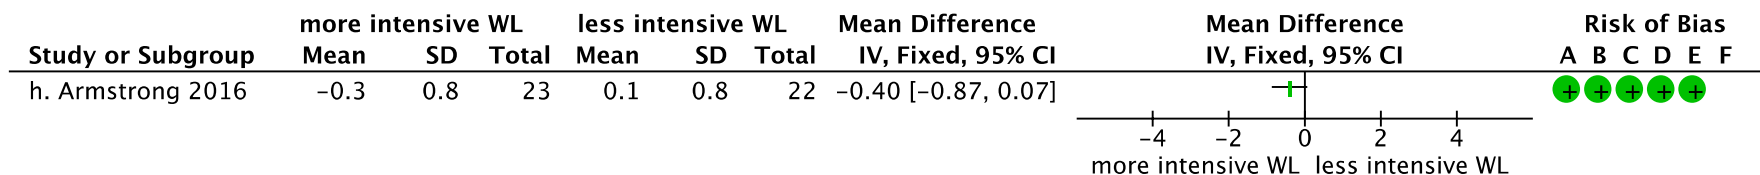

eFigure 1.11 Liver stiffness (kPa)

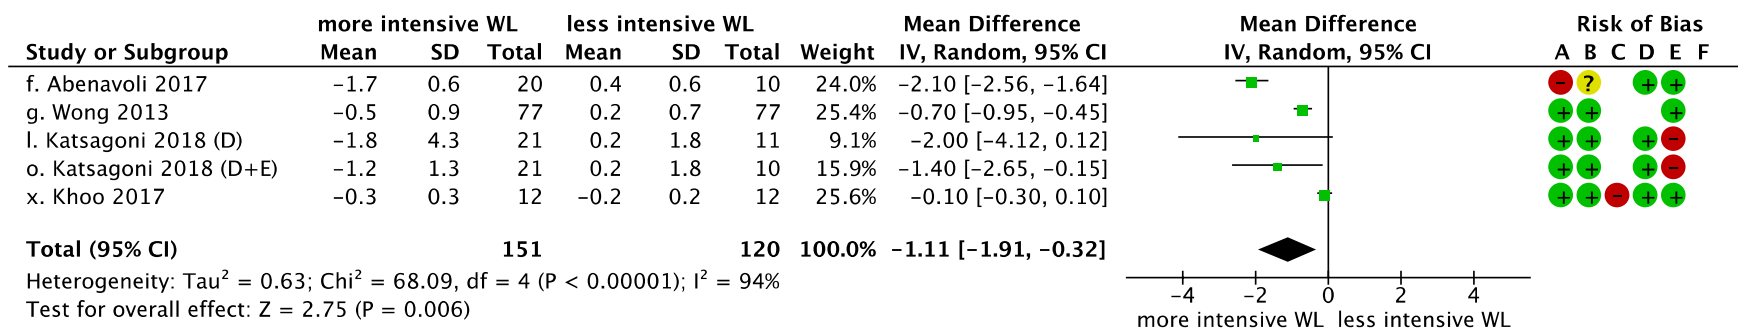

eFigure 1.12 Presence of definite NASH (Yes/No)

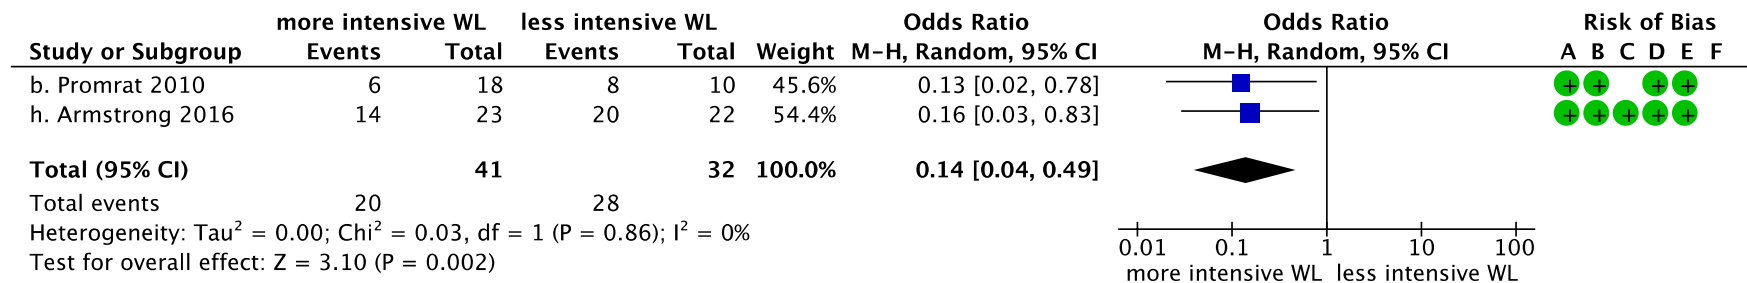

eFigure 1.13 Inflammation (score 0-3)

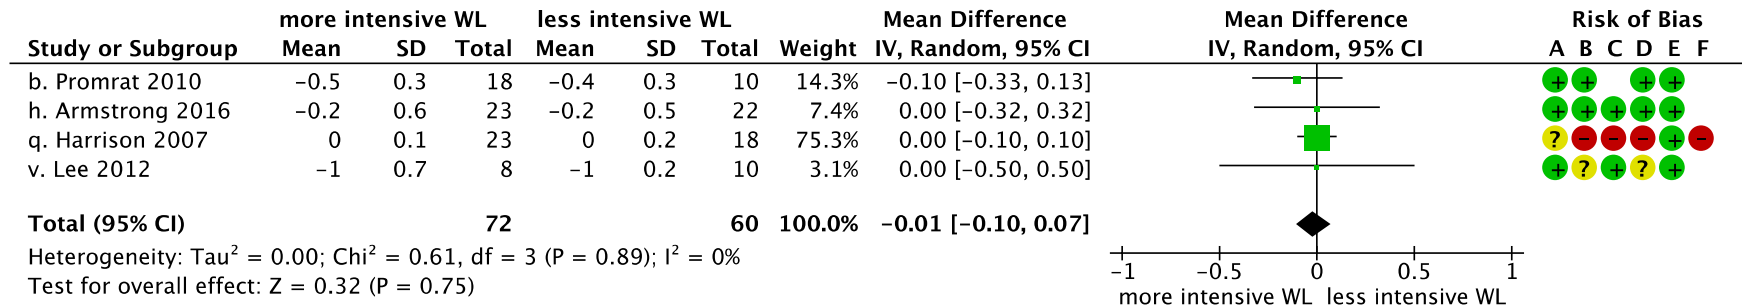

eFigure 1.14 Ballooning (score 0-2)

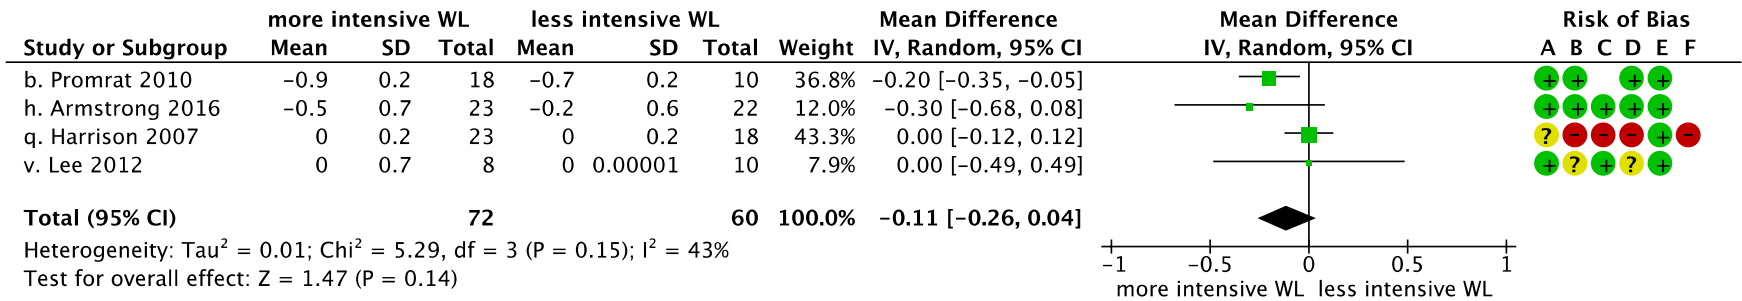

eFigure 1.15 Fibrosis (stage F0-F4)

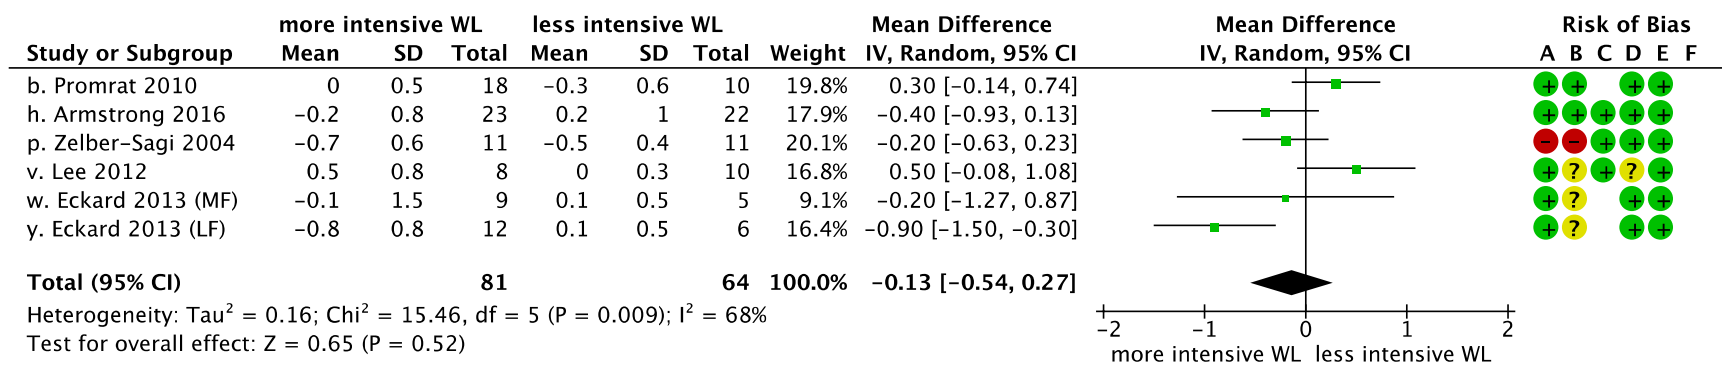

## 2 Effect of the weight loss interventions with long-term follow-up

eFigure 2.1 Weight (kg) (long-term)

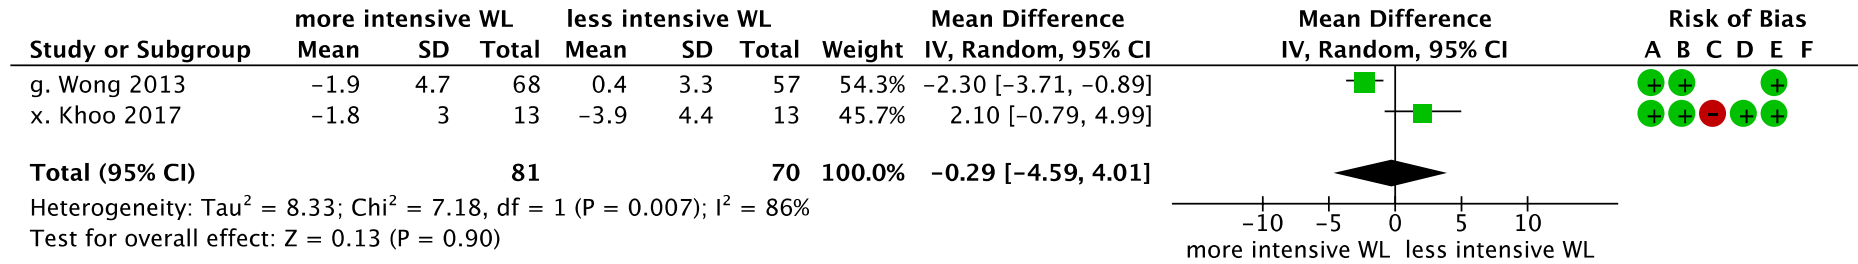

eFigure 2.2 Glucose (mmol/L) (long-term)

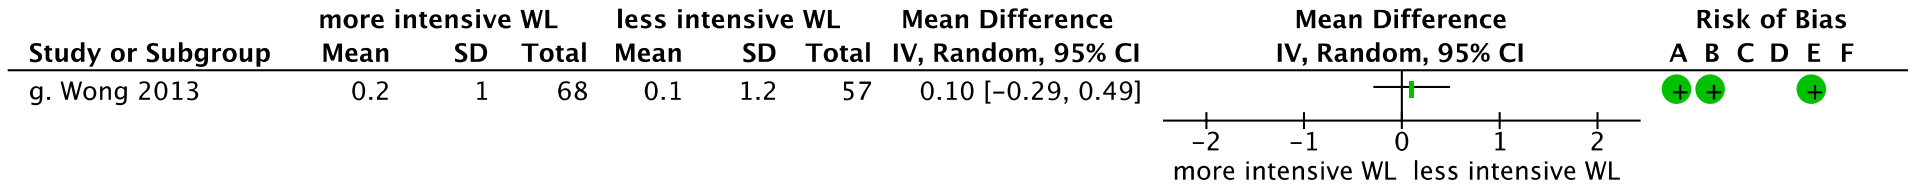

eFigure 2.3 HOMA-IR (long-term)

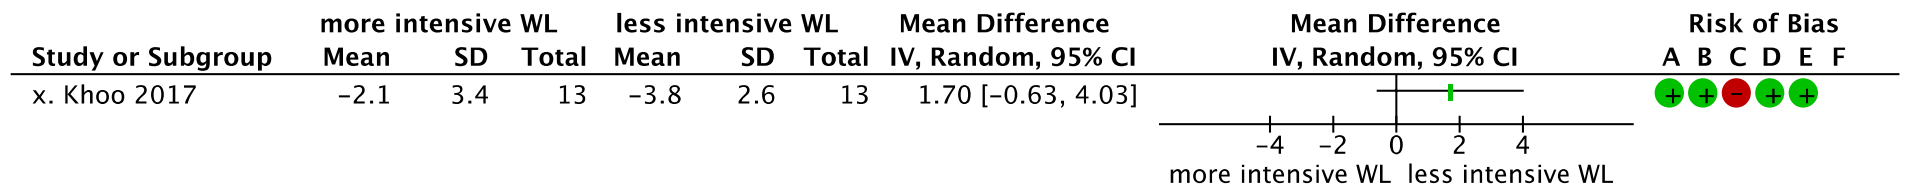

eFigure 2.4 Alanine aminotransferase – ALT (U/L) (long-term)

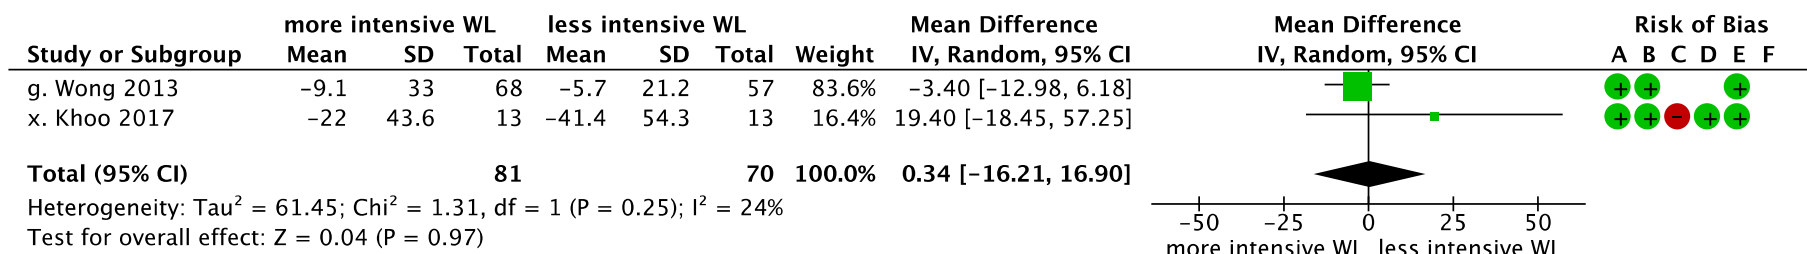

eFigure 2.5 Fatty liver index (long-term)

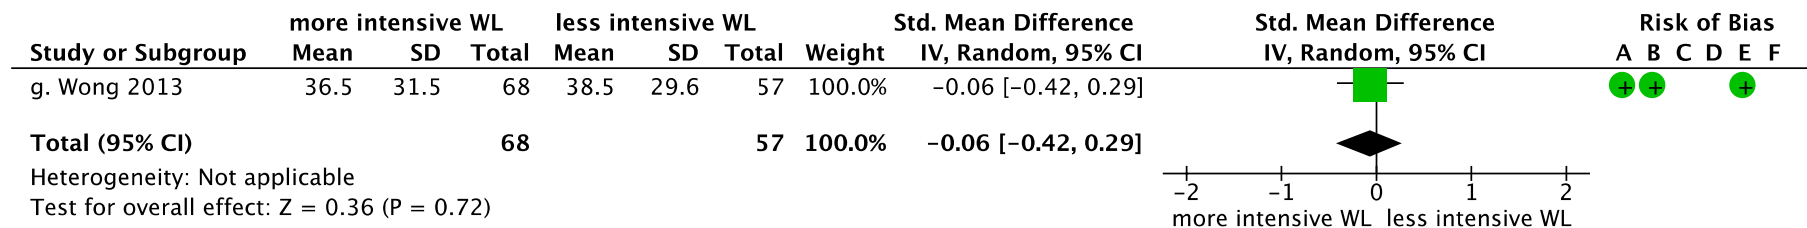

### 3 Risk of bias within and across studies

eFigure 3.1 Risk of bias within studies

|                         | Random sequence generation (selection bias) | Allocation concealment (selection bias) | Blinding of participants and personnel (performance bias) | Blinding of subjective outcome assessments | Incomplete outcome data (attrition bias) | Other bias |
|-------------------------|---------------------------------------------|-----------------------------------------|-----------------------------------------------------------|--------------------------------------------|------------------------------------------|------------|
| a. Al-Jiffri 2013       | ?                                           | ?                                       |                                                           |                                            | +                                        |            |
| b. Katsagoni 2018 (D)   | +                                           | +                                       |                                                           | +                                          | -                                        |            |
| c. Promrat 2010         | +                                           | +                                       |                                                           | +                                          | +                                        |            |
| d. AbdEl-Kader 2016     | ?                                           | +                                       |                                                           |                                            | ?                                        |            |
| e. Sun 2012             | +                                           | ?                                       |                                                           | +                                          | +                                        |            |
| f. Bahmanabadi 2011     | ?                                           | ?                                       | -                                                         | ?                                          | ?                                        |            |
| g. Abenavoli 2017       | -                                           | ?                                       |                                                           | +                                          | +                                        |            |
| h. Wong 2013            | +                                           | +                                       |                                                           |                                            | +                                        |            |
| i. Armstrong 2016       | +                                           | +                                       | +                                                         | +                                          | +                                        |            |
| j. Asghari 2018         | +                                           | -                                       | +                                                         | +                                          | +                                        |            |
| k. Axley 2017           | +                                           | +                                       |                                                           |                                            | -                                        |            |
| l. Selezneva 2014       | ?                                           | ?                                       |                                                           |                                            | +                                        |            |
| m. Lim 2018             | ?                                           | ?                                       |                                                           |                                            | ?                                        | -          |
| n. StGeorge 2009 (M)    | ?                                           | ?                                       |                                                           |                                            | +                                        | -          |
| o. Zelber-Sagi 2004     | -                                           | -                                       | +                                                         | +                                          | +                                        |            |
| p. Harrison 2007        | ?                                           | -                                       | -                                                         | -                                          | +                                        | -          |
| q. Cheng 2017 (D+E)     | +                                           | +                                       |                                                           | +                                          | +                                        | -          |
| r. Dong 2016            | +                                           | ?                                       |                                                           | +                                          | +                                        | -          |
| s. StGeorge 2009 (L)    | ?                                           | ?                                       |                                                           |                                            | +                                        | -          |
| t. Cheng 2017 (D)       | +                                           | +                                       |                                                           | +                                          | +                                        | -          |
| u. Lee 2009             | +                                           | ?                                       | +                                                         | ?                                          | +                                        |            |
| v. Katsagoni 2018 (D+E) | +                                           | +                                       |                                                           | +                                          | -                                        |            |
| w. Eckard 2013 (MF)     | +                                           | ?                                       |                                                           | +                                          | +                                        |            |
| x. Khoo 2017            | +                                           | +                                       | -                                                         | +                                          | +                                        |            |
| y. Eckard 2013 (LF)     | +                                           | ?                                       |                                                           | +                                          | +                                        |            |
| z. Ye 2017              | ?                                           | ?                                       | ?                                                         | ?                                          | ?                                        | -          |



eFigure 3.2 Funnel plot of studies reporting (a) alanine aminotransferase (ALT) and (b) aspartate transaminase (AST)

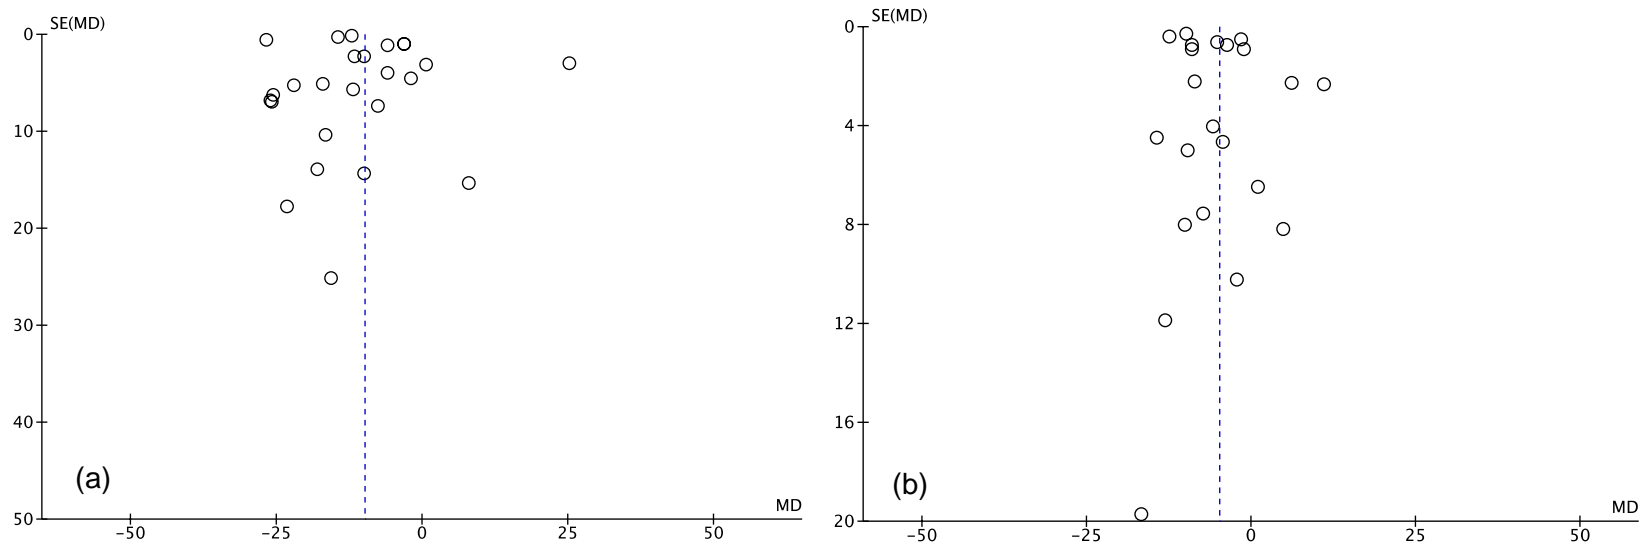

#### 4 Sensitivity analysis including only the studies with low risk of bias

eFigure 4.1 Weight (kg) (sensitivity analysis)

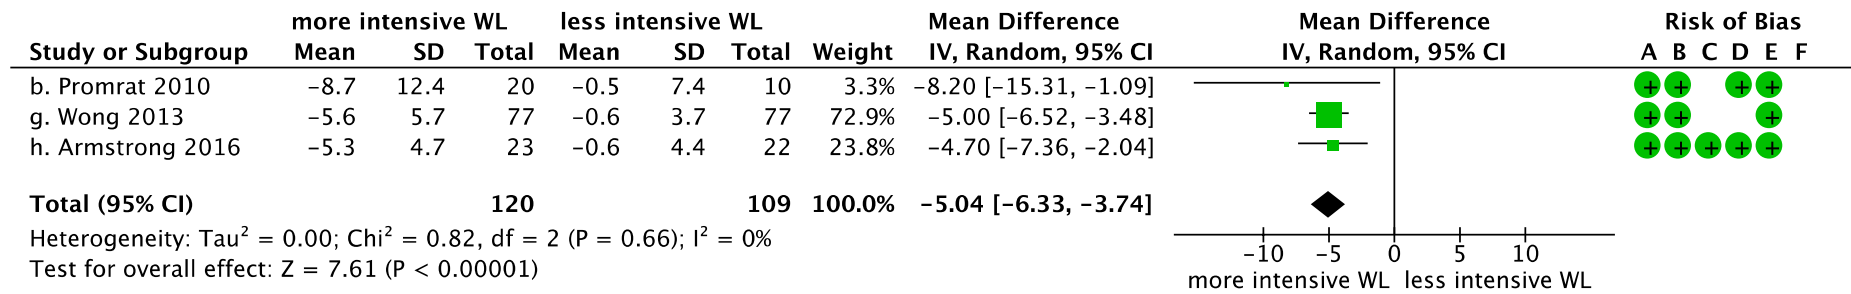

eFigure 4.2 HOMA-IR (sensitivity analysis)

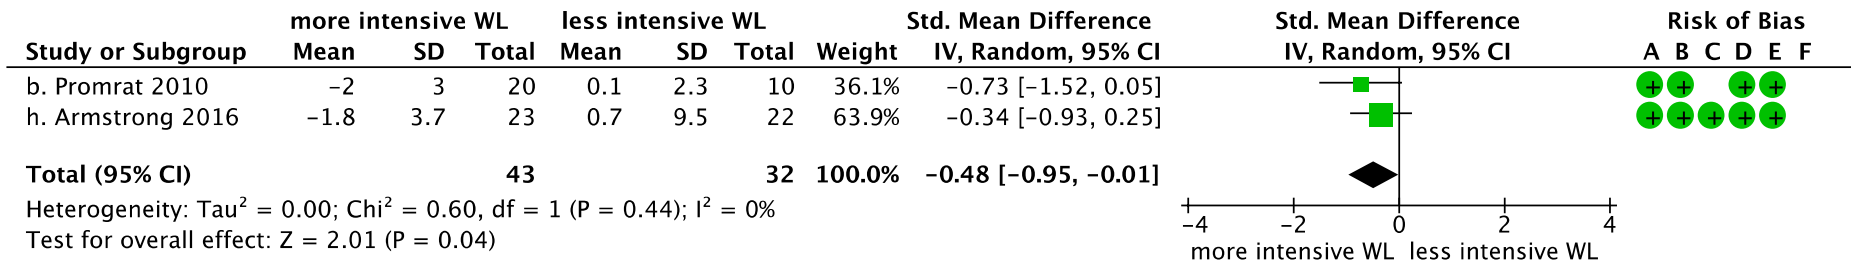

eFigure 4.3 Glucose (mmol/L) (sensitivity analysis)

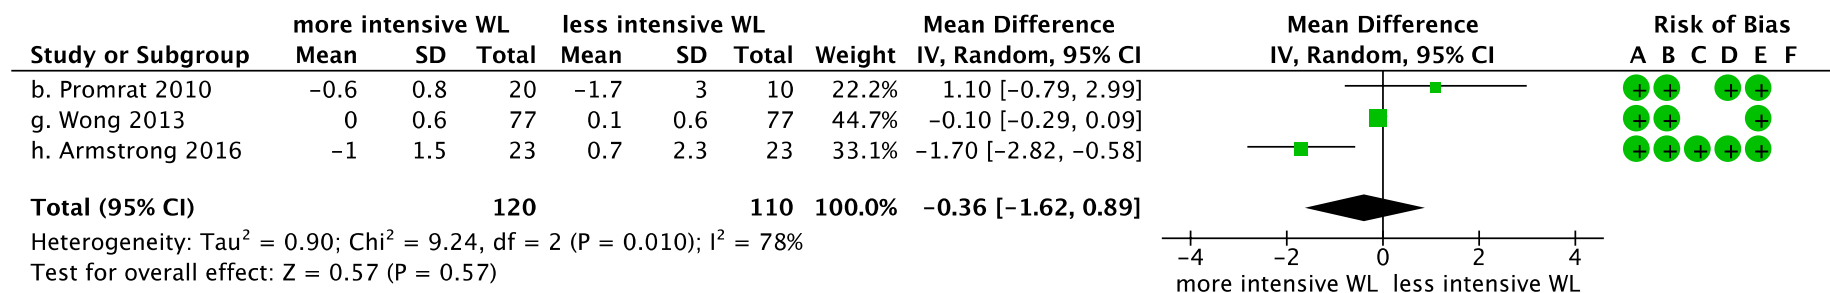

eFigure 4.4 Insulin (pmol/L) (sensitivity analysis)

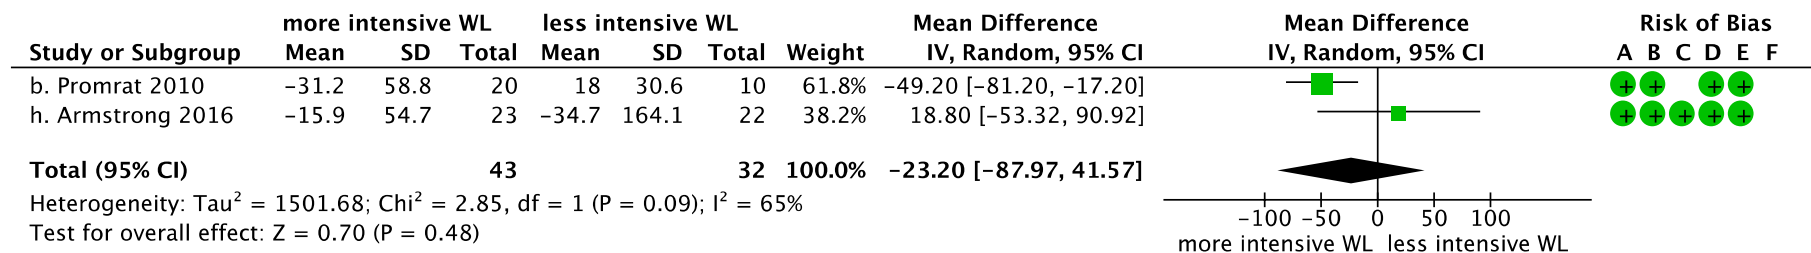

Figure 4.5 HbA1c (%) (sensitivity analysis)

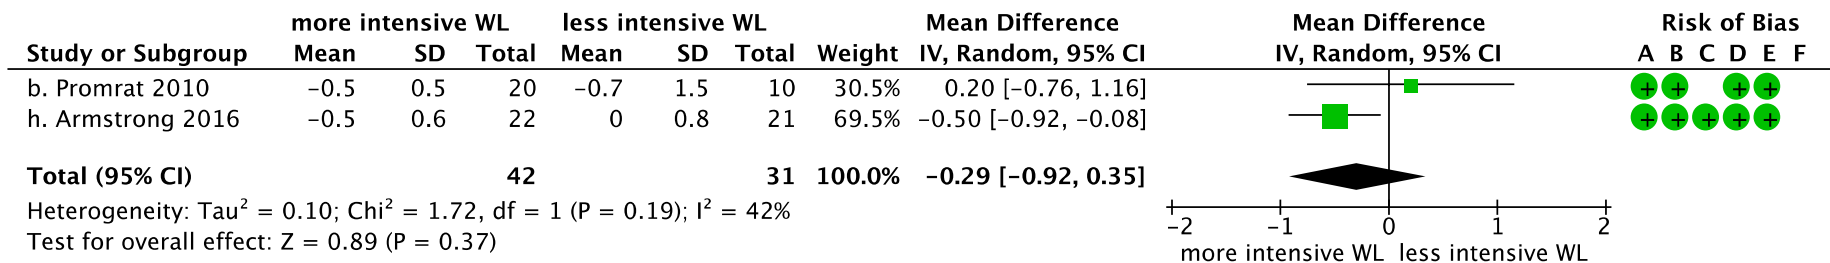

eFigure 4.6 Alanine aminotransferase – ALT (U/L) (sensitivity analysis)

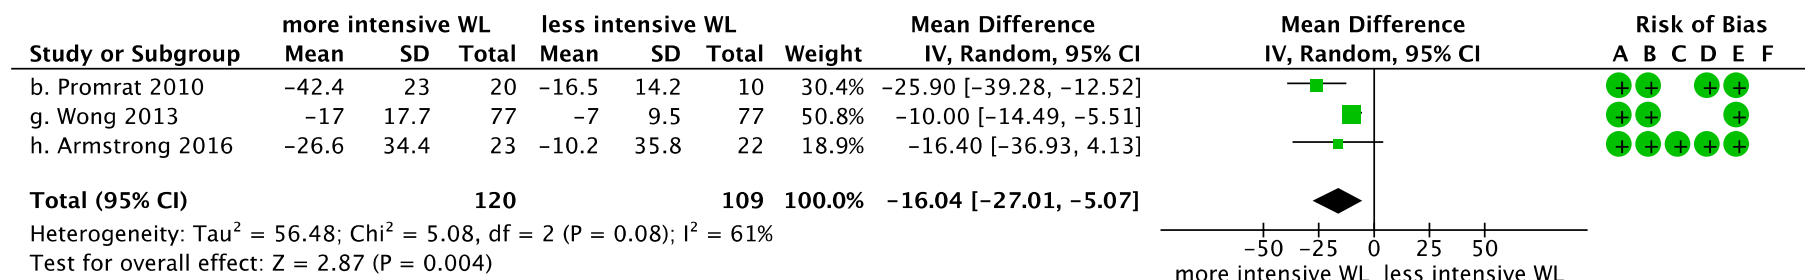

eFigure 4.7 Liver stiffness (kPa) (sensitivity analysis)

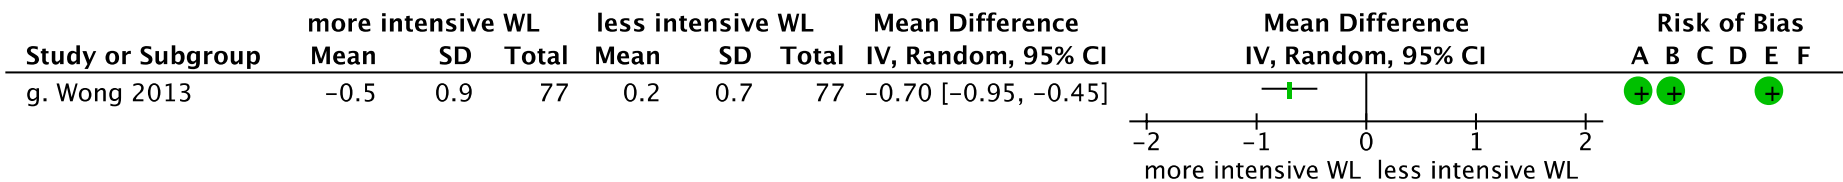

eFigure 4.8 Steatosis – Standardized Mean Difference as Assessed by Histologic Examination or MRI (Sensitivity Analysis)

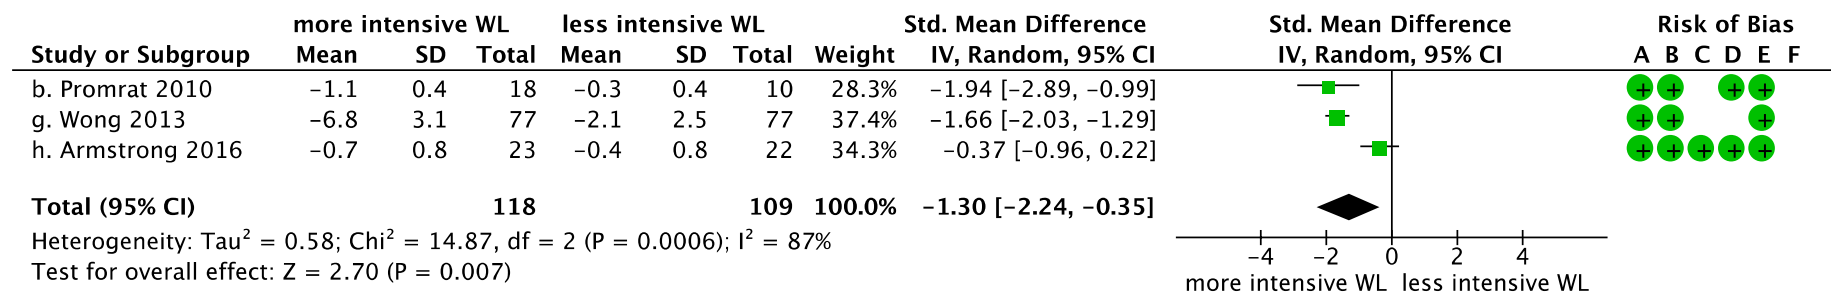

eFigure 4.9 NAFLD activity score (NAS) (sensitivity analysis)

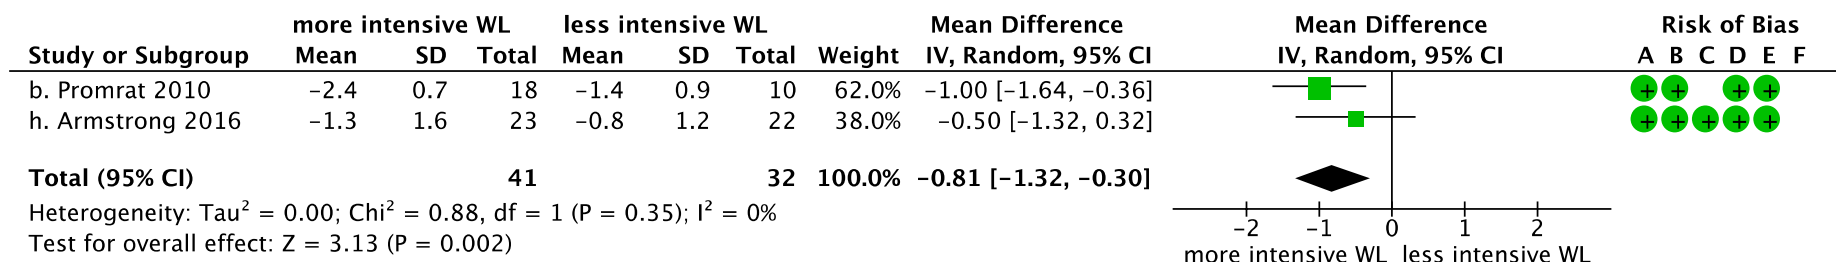

eFigure 4.10 Inflammation (score 0-3) (sensitivity analysis)

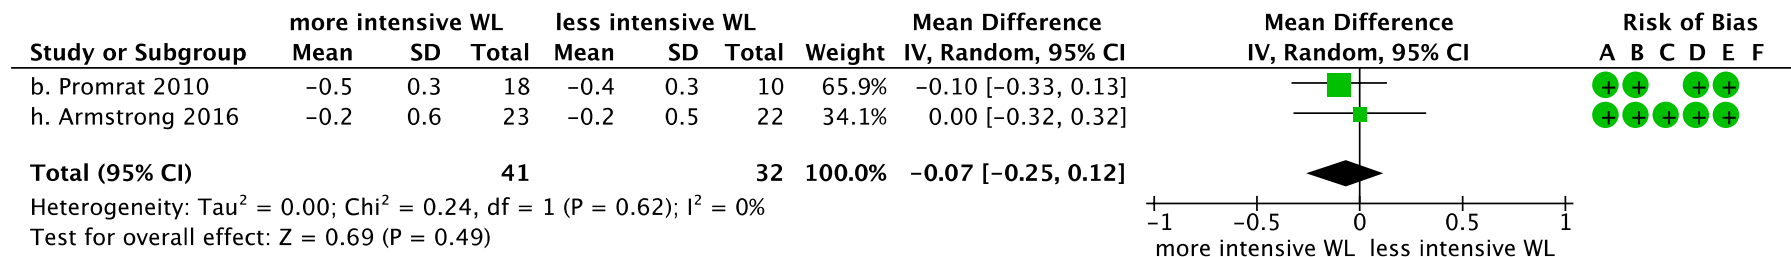

eFigure 4.11 Ballooning (score 0-2) (sensitivity analysis)

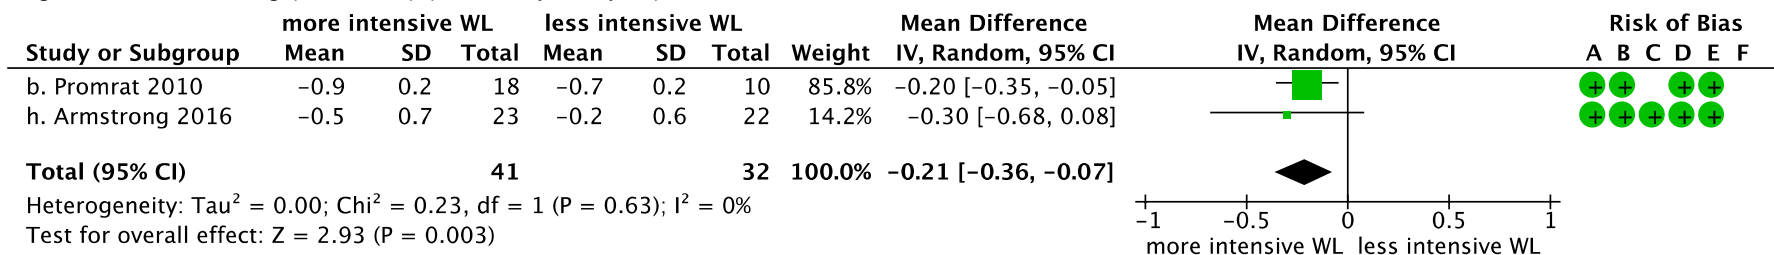

eFigure 4.12 Fibrosis (scale F0-F4) (sensitivity analysis)

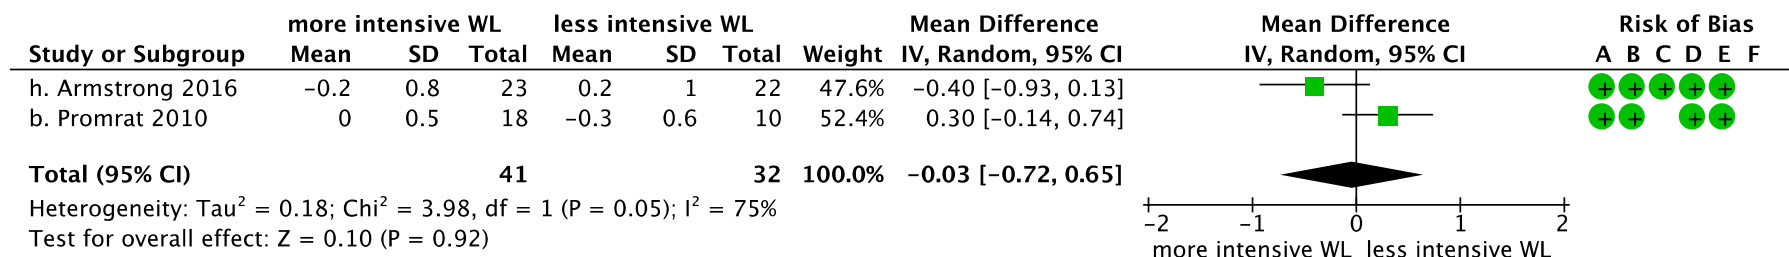

eFigure 4.13 Aspartate transaminase – AST (U/L) (sensitivity analysis)

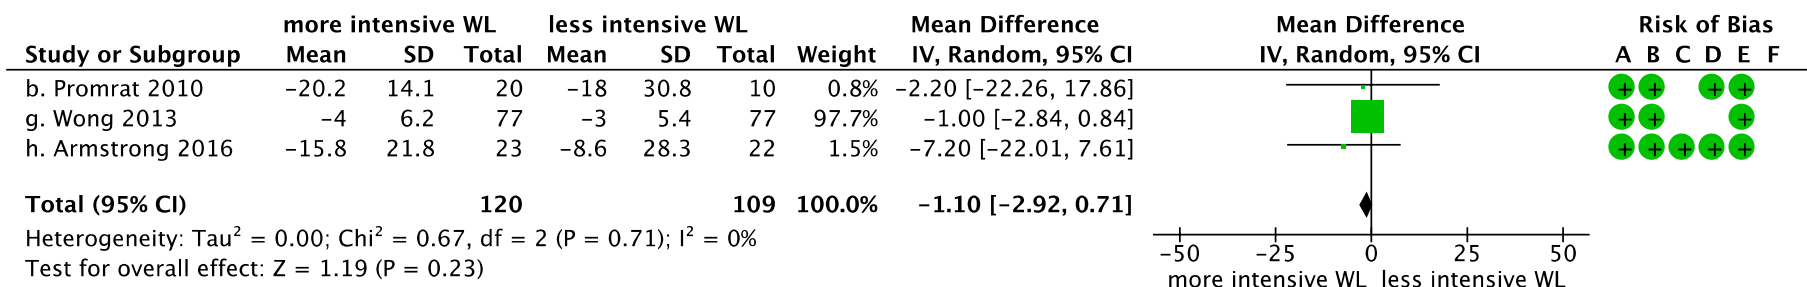

eFigure 4.14 Alkaline phosphatase – ALP (U/L) (sensitivity analysis)

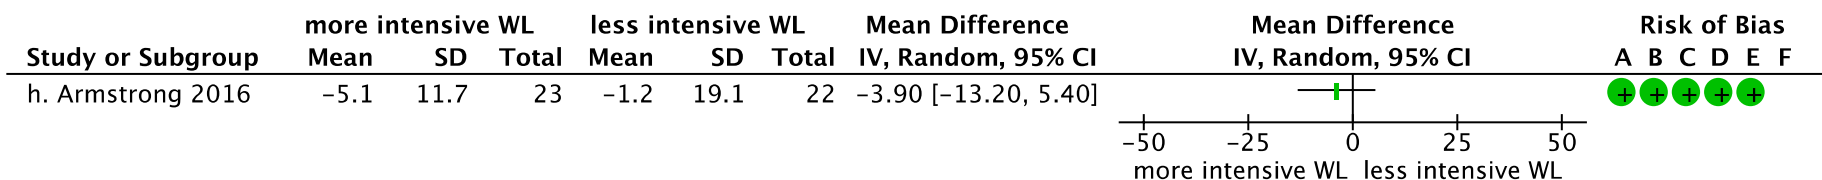

eFigure 4.15  $\gamma$ -glutamyl transferase – GGT (U/L) (sensitivity analysis)

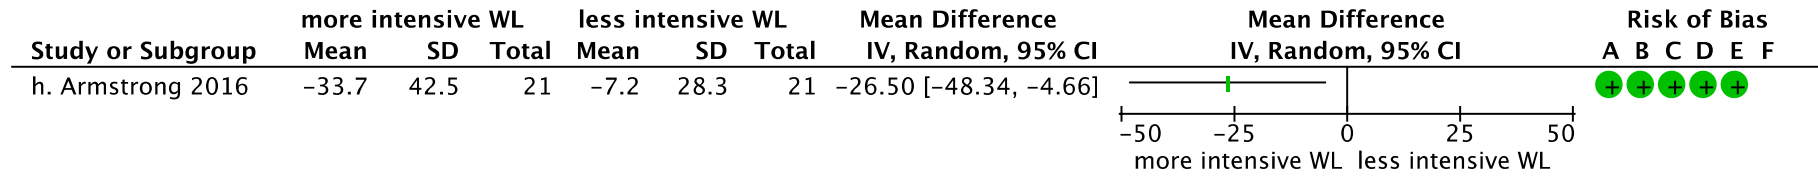

## 5 Subgroup analysis by the type of intervention (behavioral, pharmacotherapy, surgery)

eFigure 5.1 Weight (kg) (subgroup analysis by the type of intervention)

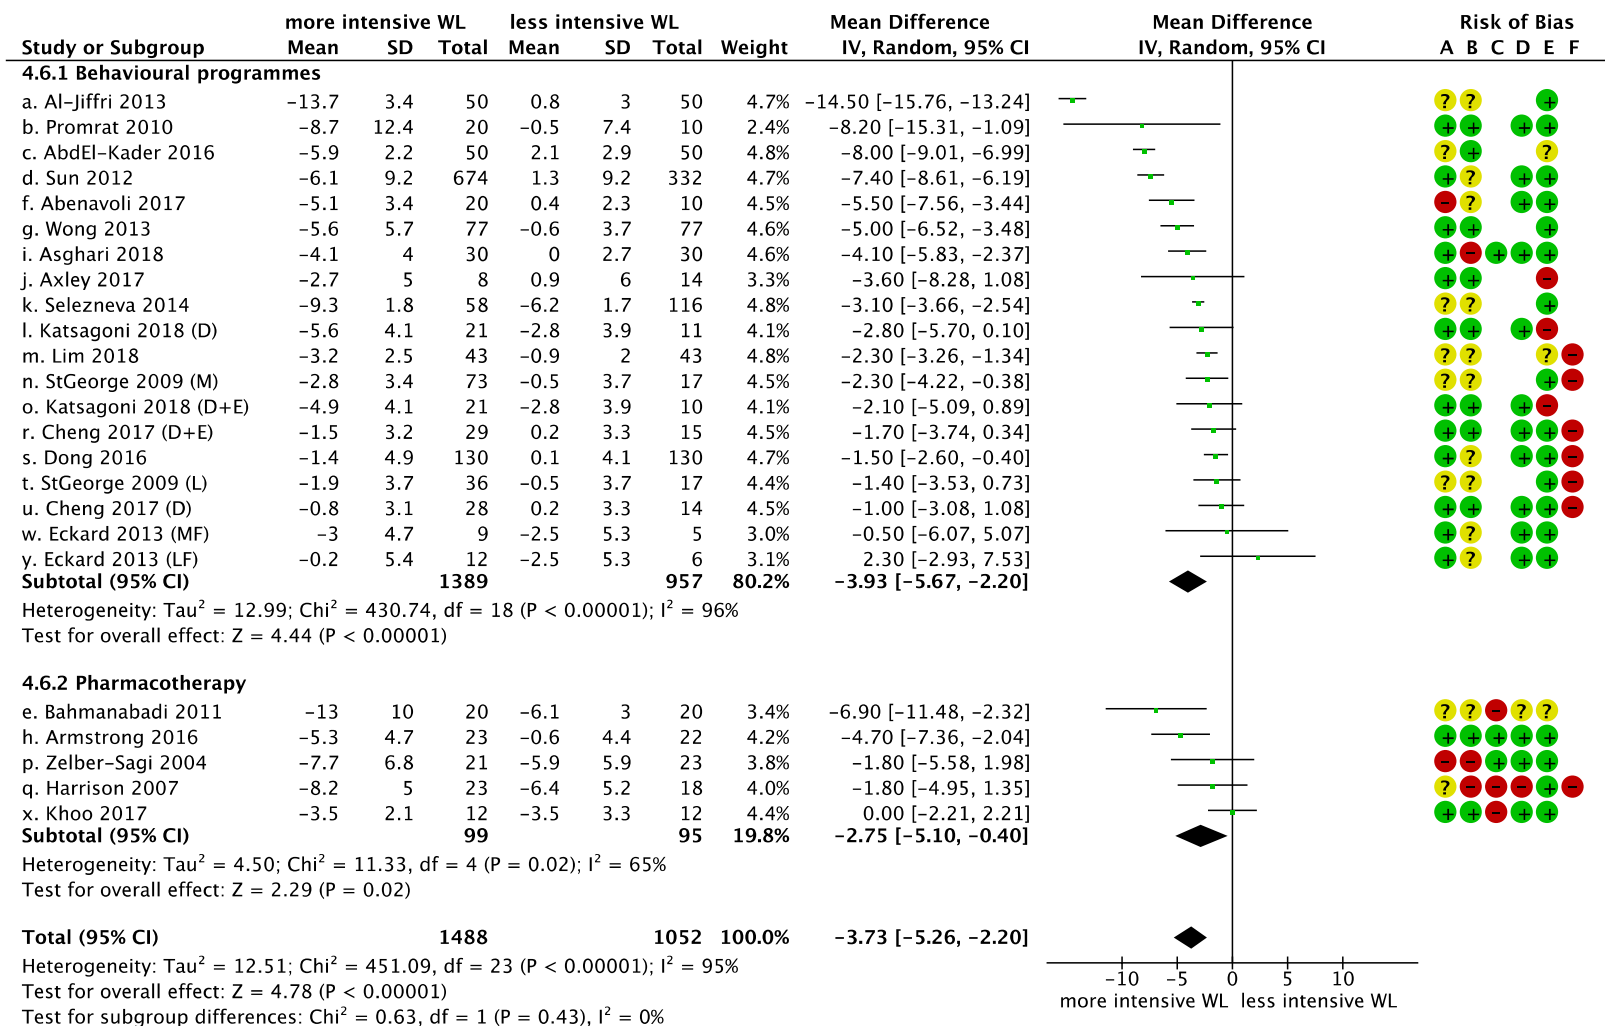



eFigure 5.2 Glucose (mmol/L) (subgroup analysis by the type of intervention)

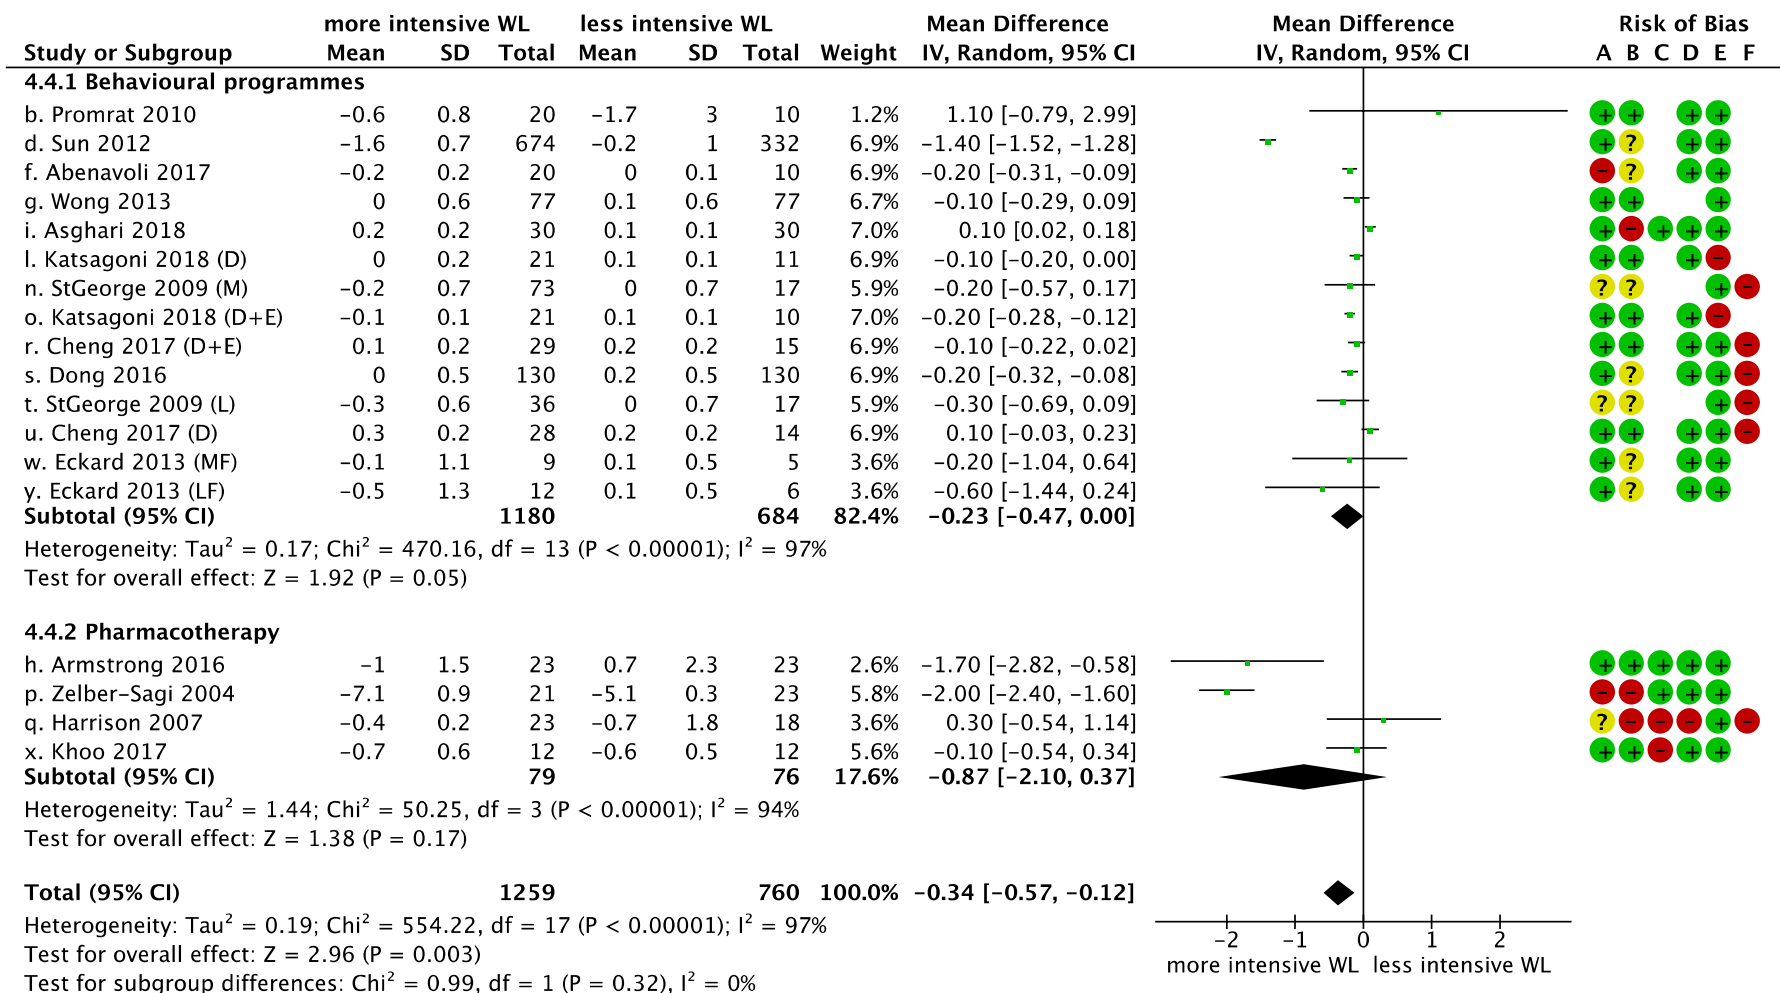

eFigure 5.3 Insulin resistance index (HOMA-IR or other) (subgroup analysis by the type of intervention)

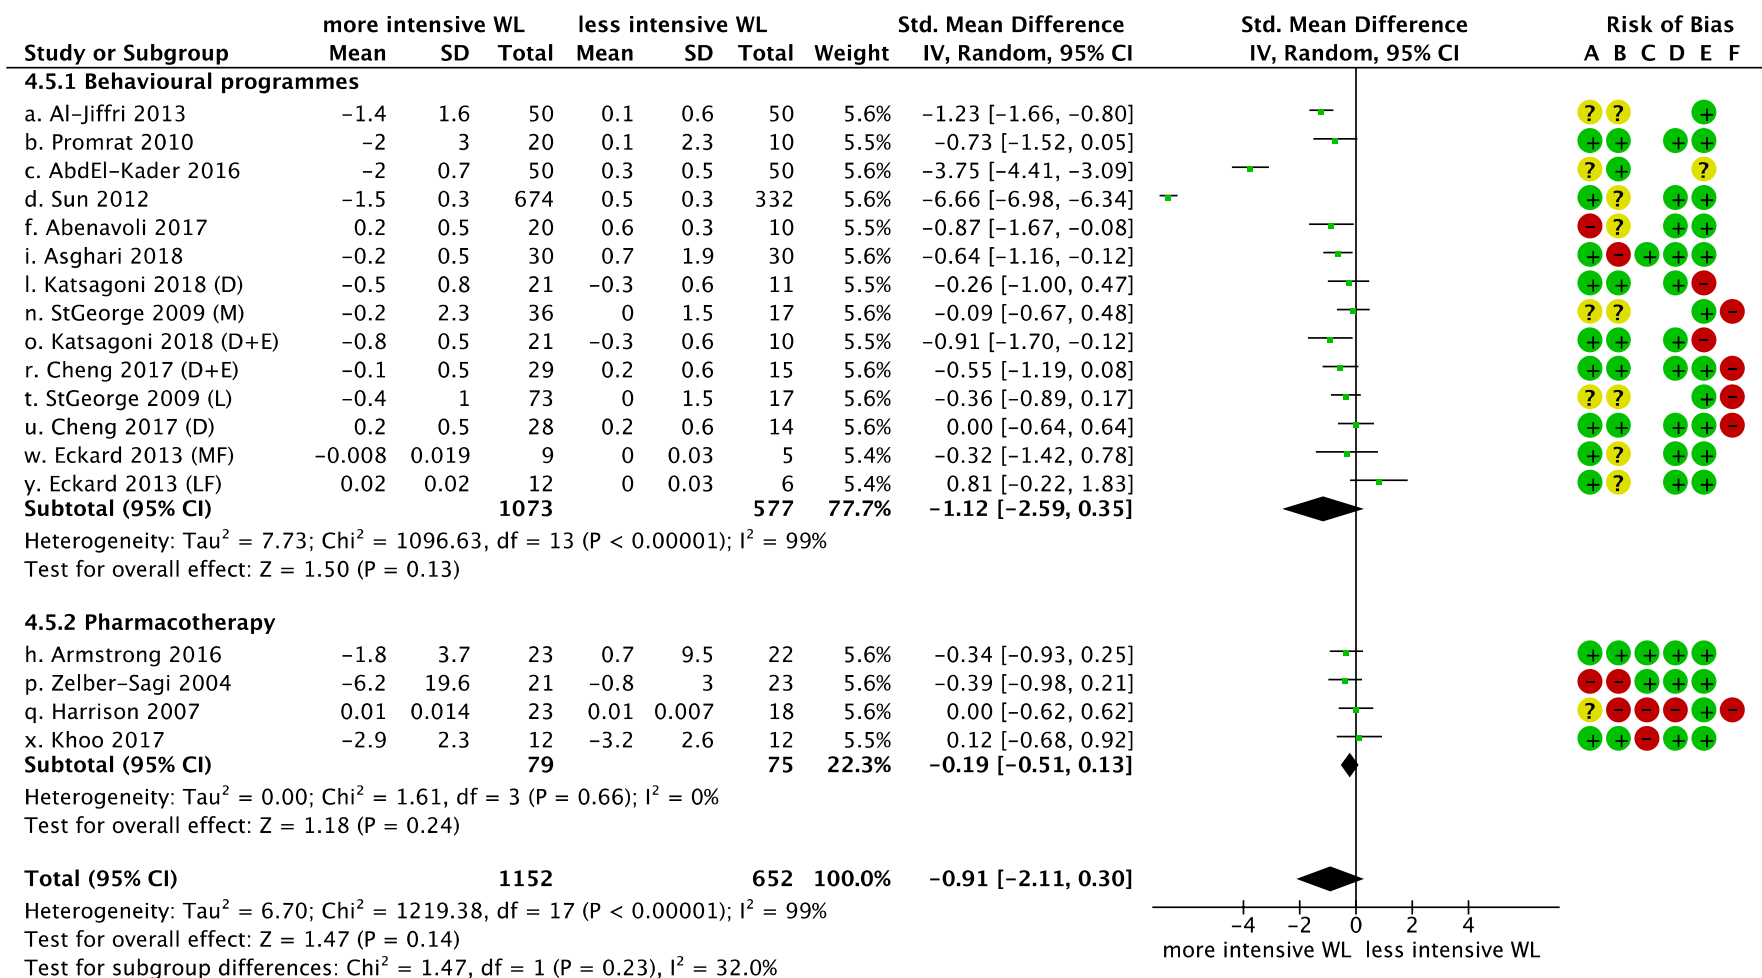

eFigure 5.4 Insulin (pmol/L) (subgroup analysis by the type of intervention)

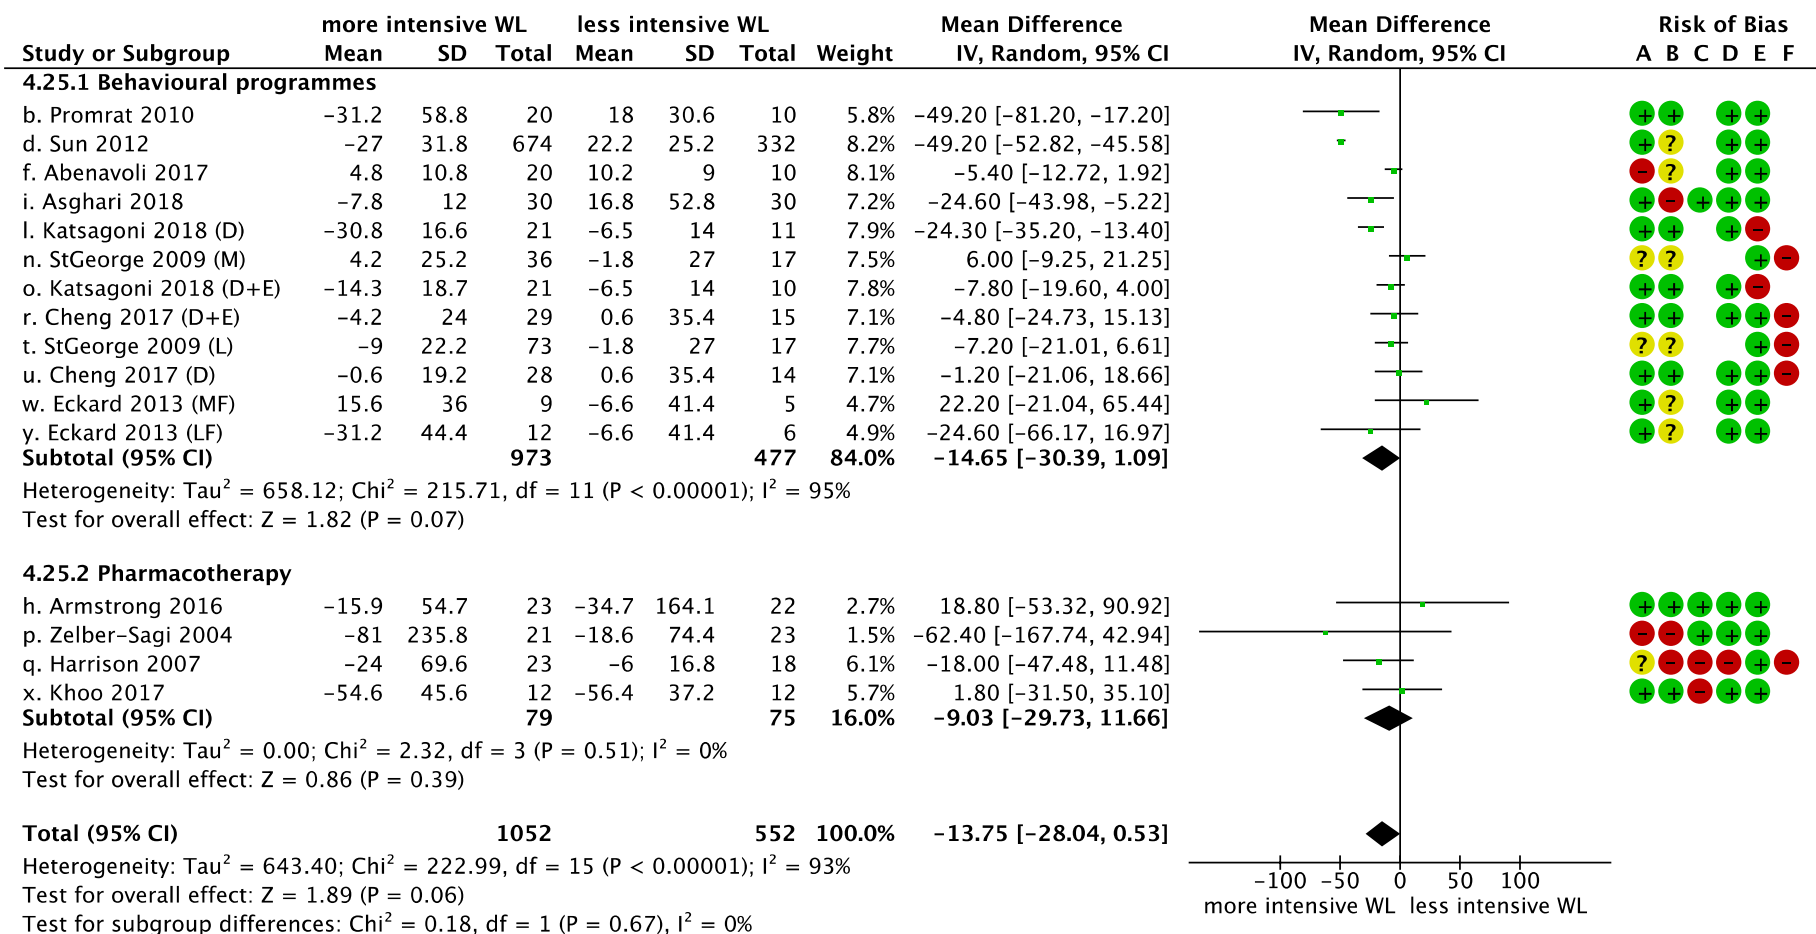

eFigure 5.5 ALT (U/L) (subgroup analysis by type of intervention)

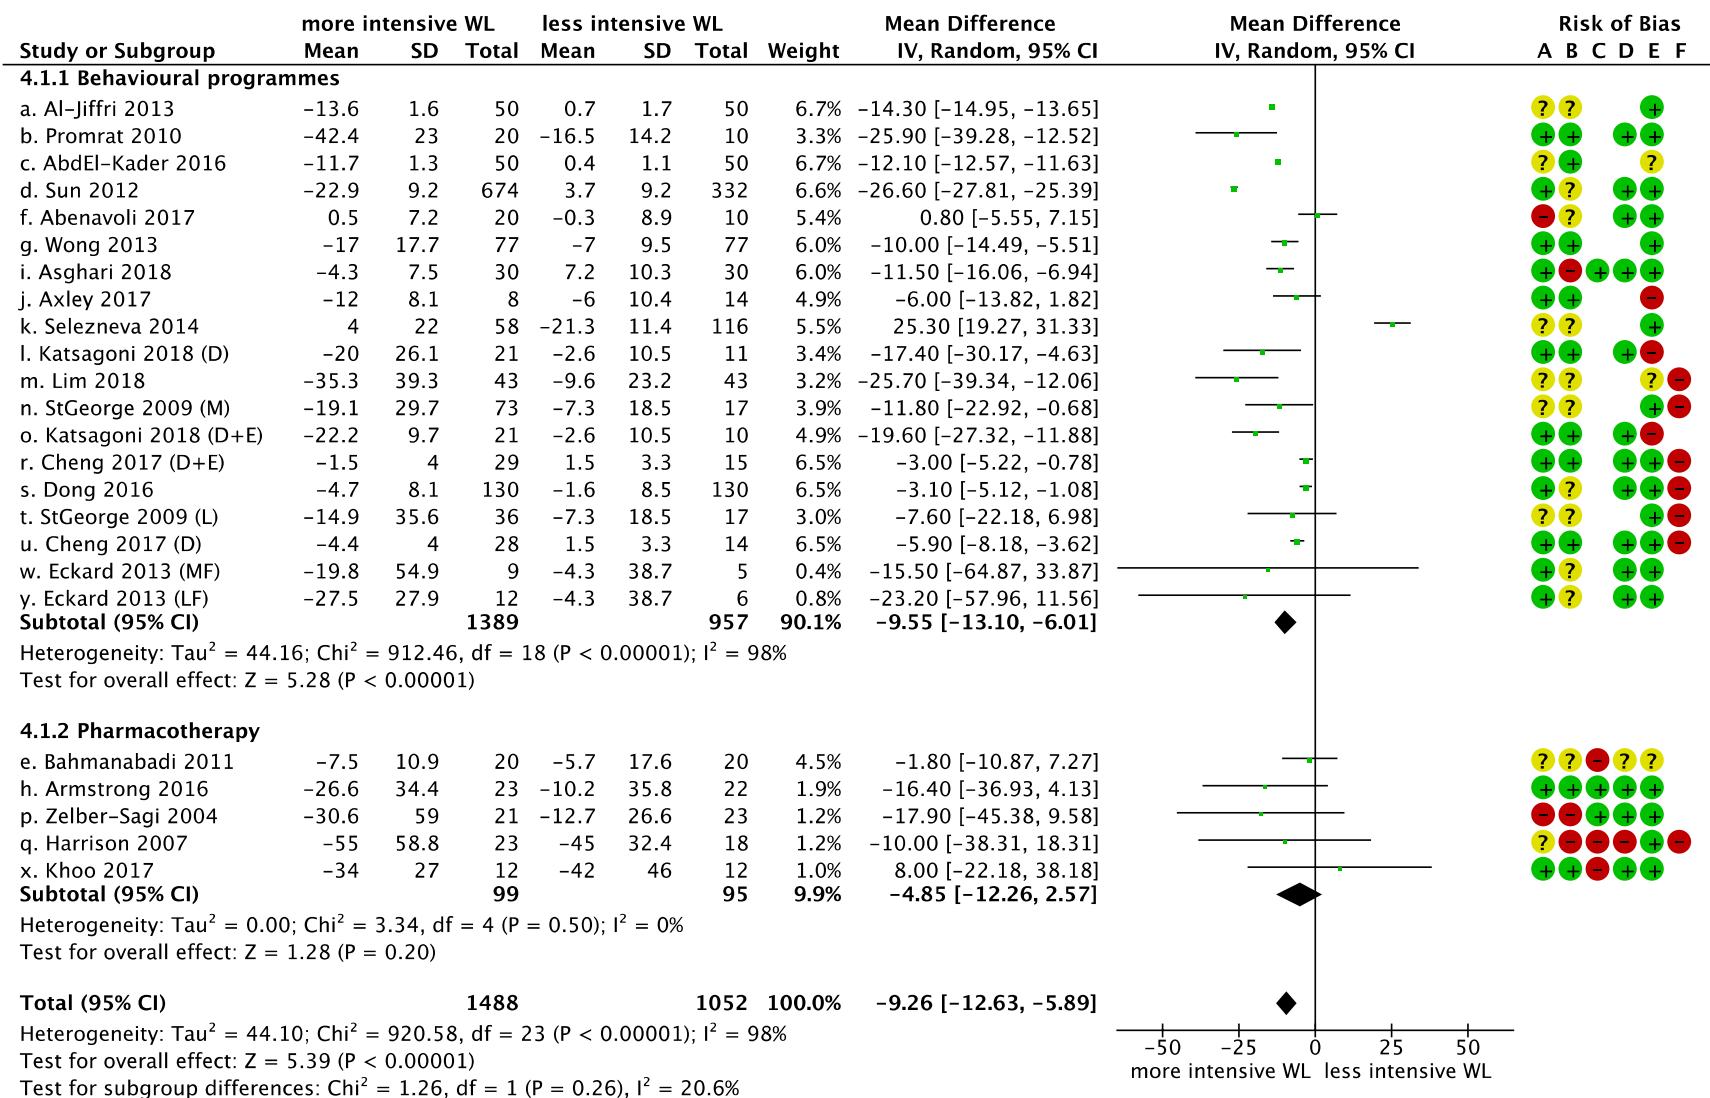

eFigure 5.6 Steatosis – Standardized Mean Difference as Assessed by Histologic Examination or MRI (Subgroup Analysis by the Type of Intervention)

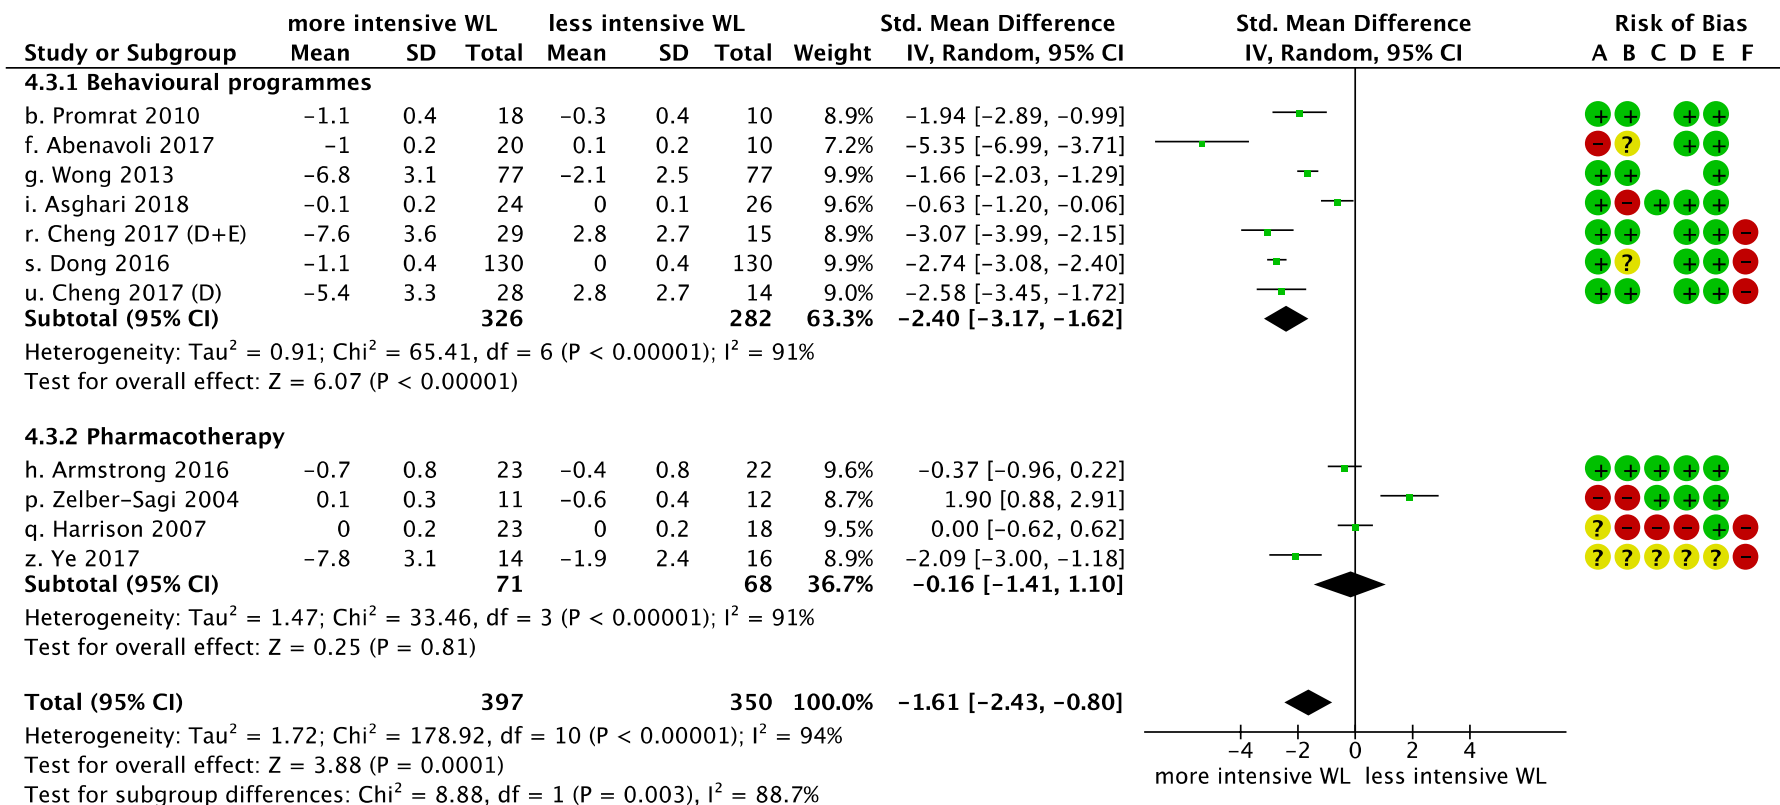

eFigure 5.7 AST (U/L) (subgroup analysis by type of intervention)

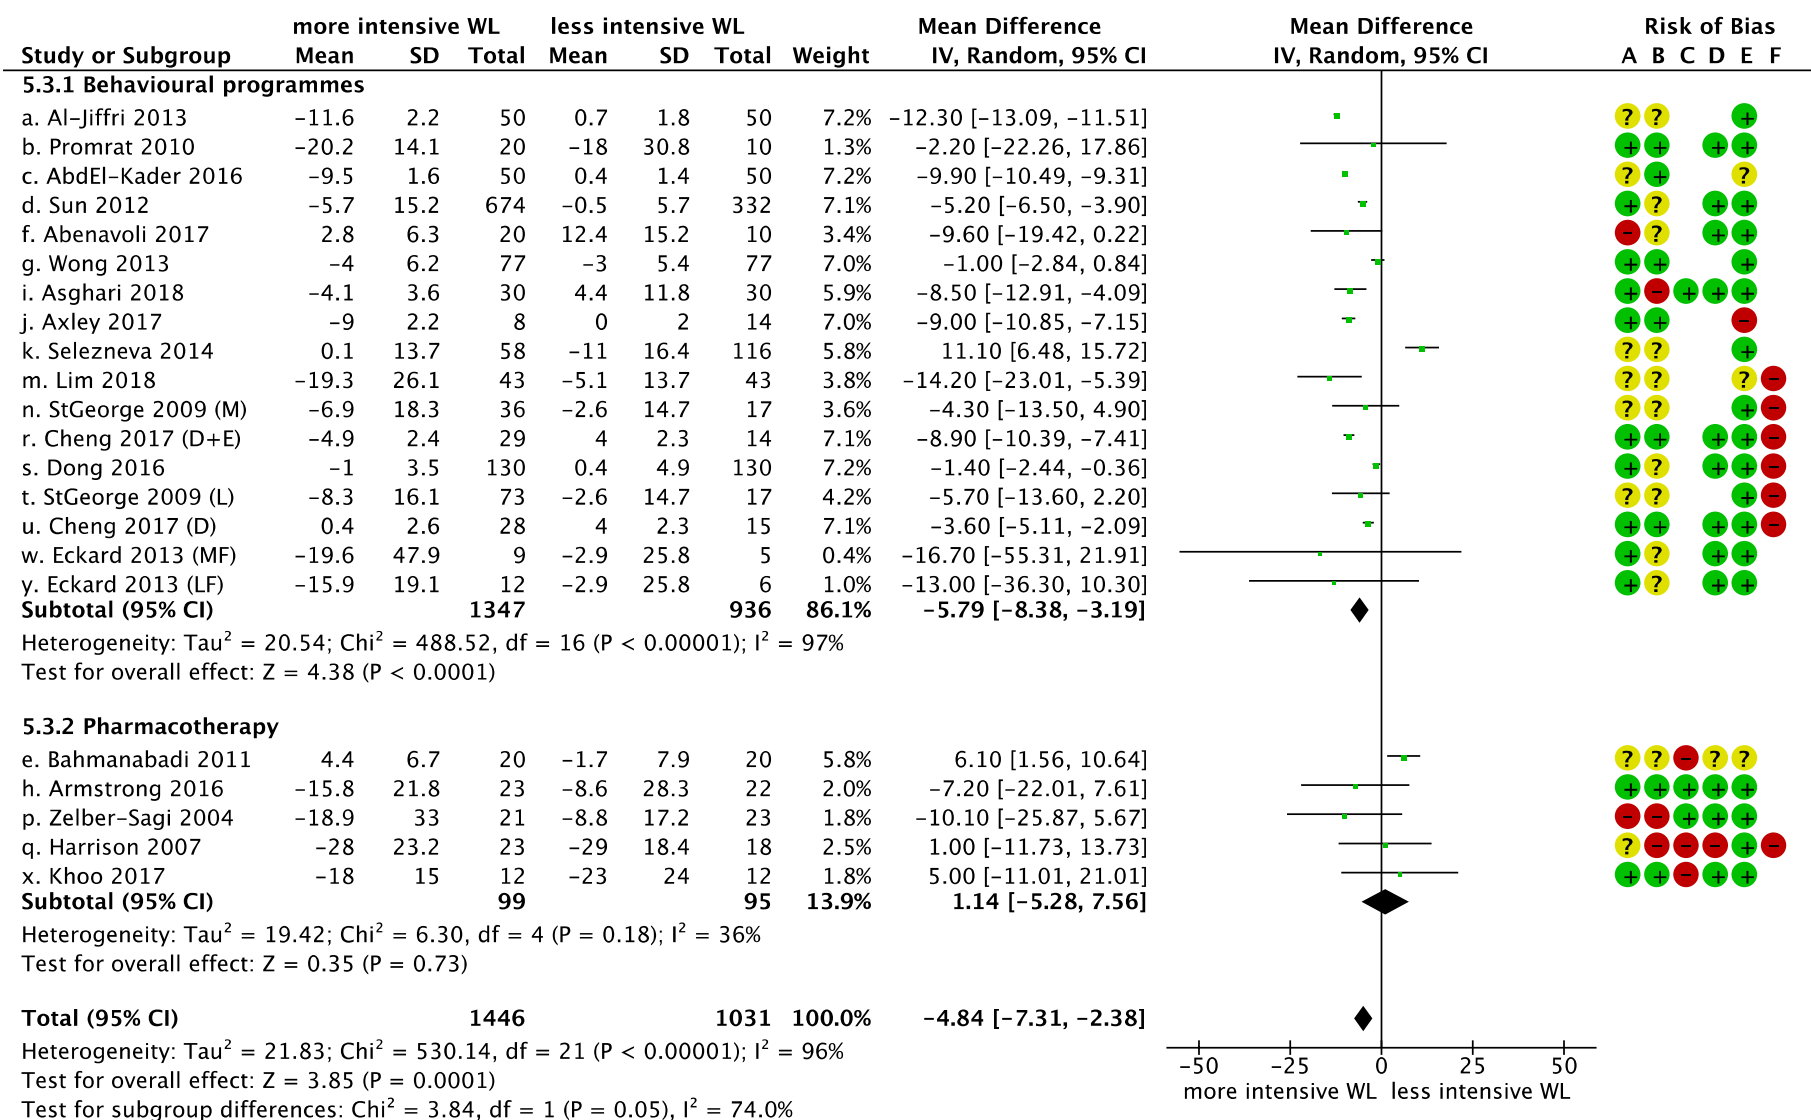

## 6 Subgroup analysis by the intensity of the comparator intervention

eFigure 6.1 Weight change (kg) by the intensity of the comparator intervention

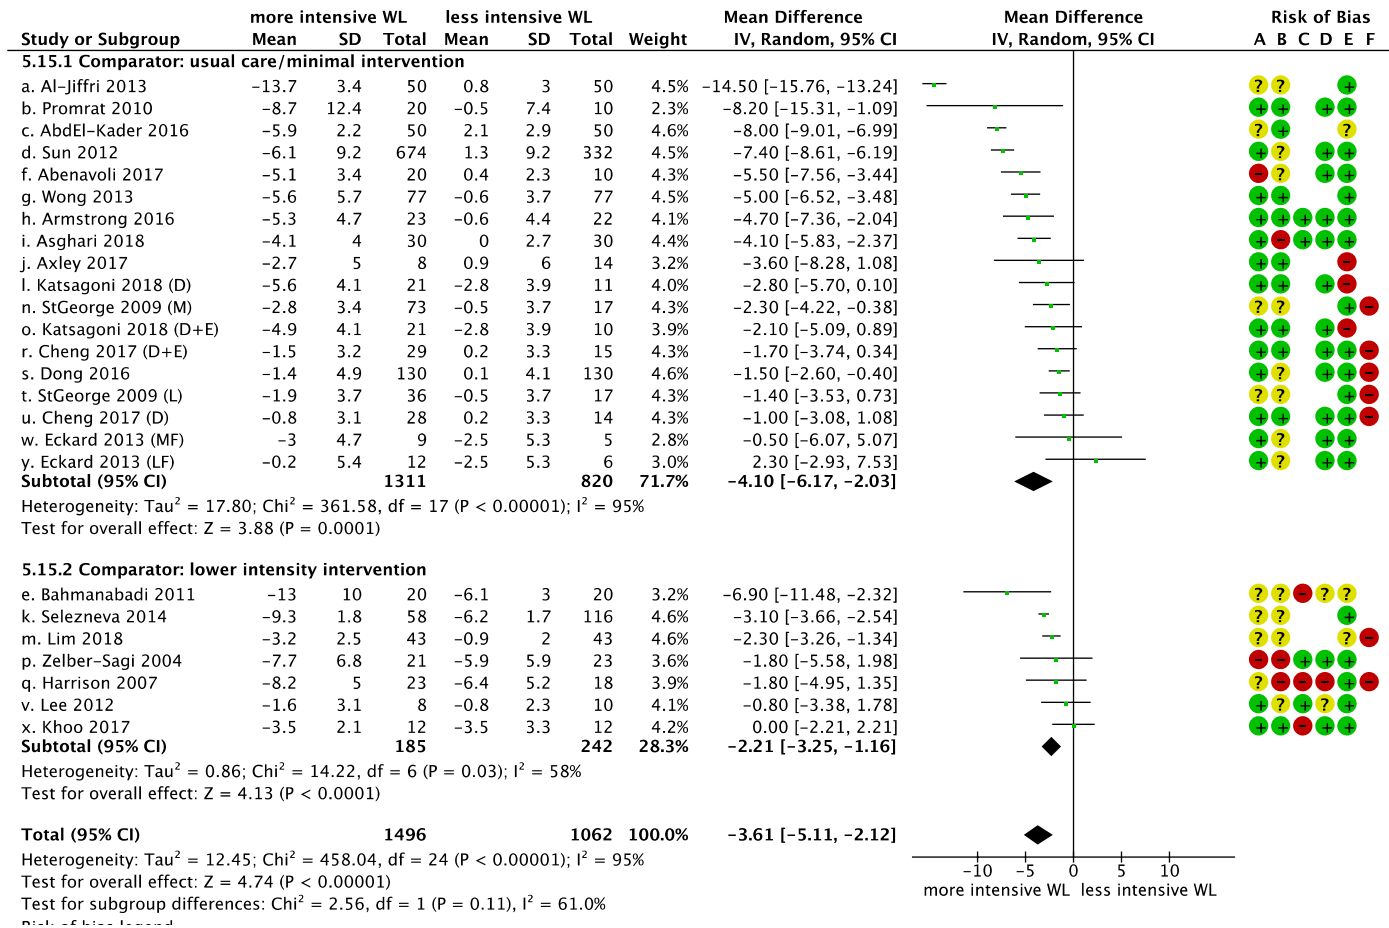

eFigure 6.2 Glucose (mmol/L) by the intensity of the comparator intervention

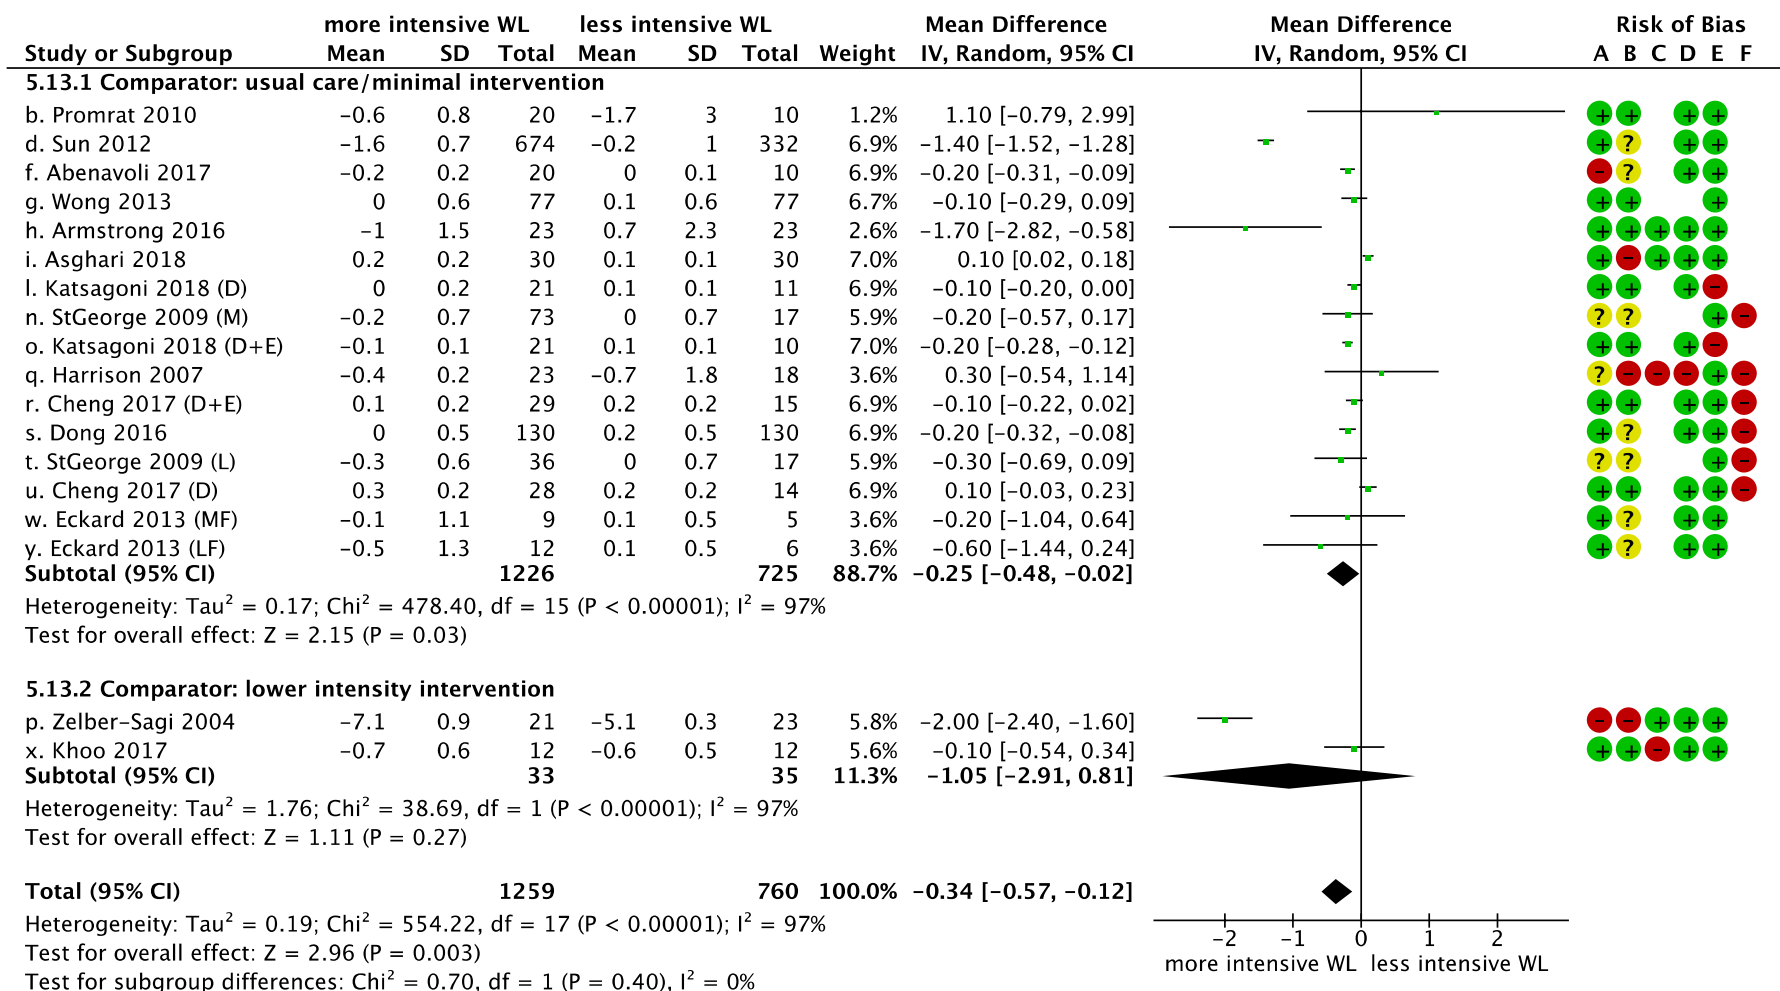



eFigure 6.3 Insulin resistance indices by the intensity of the comparator intervention

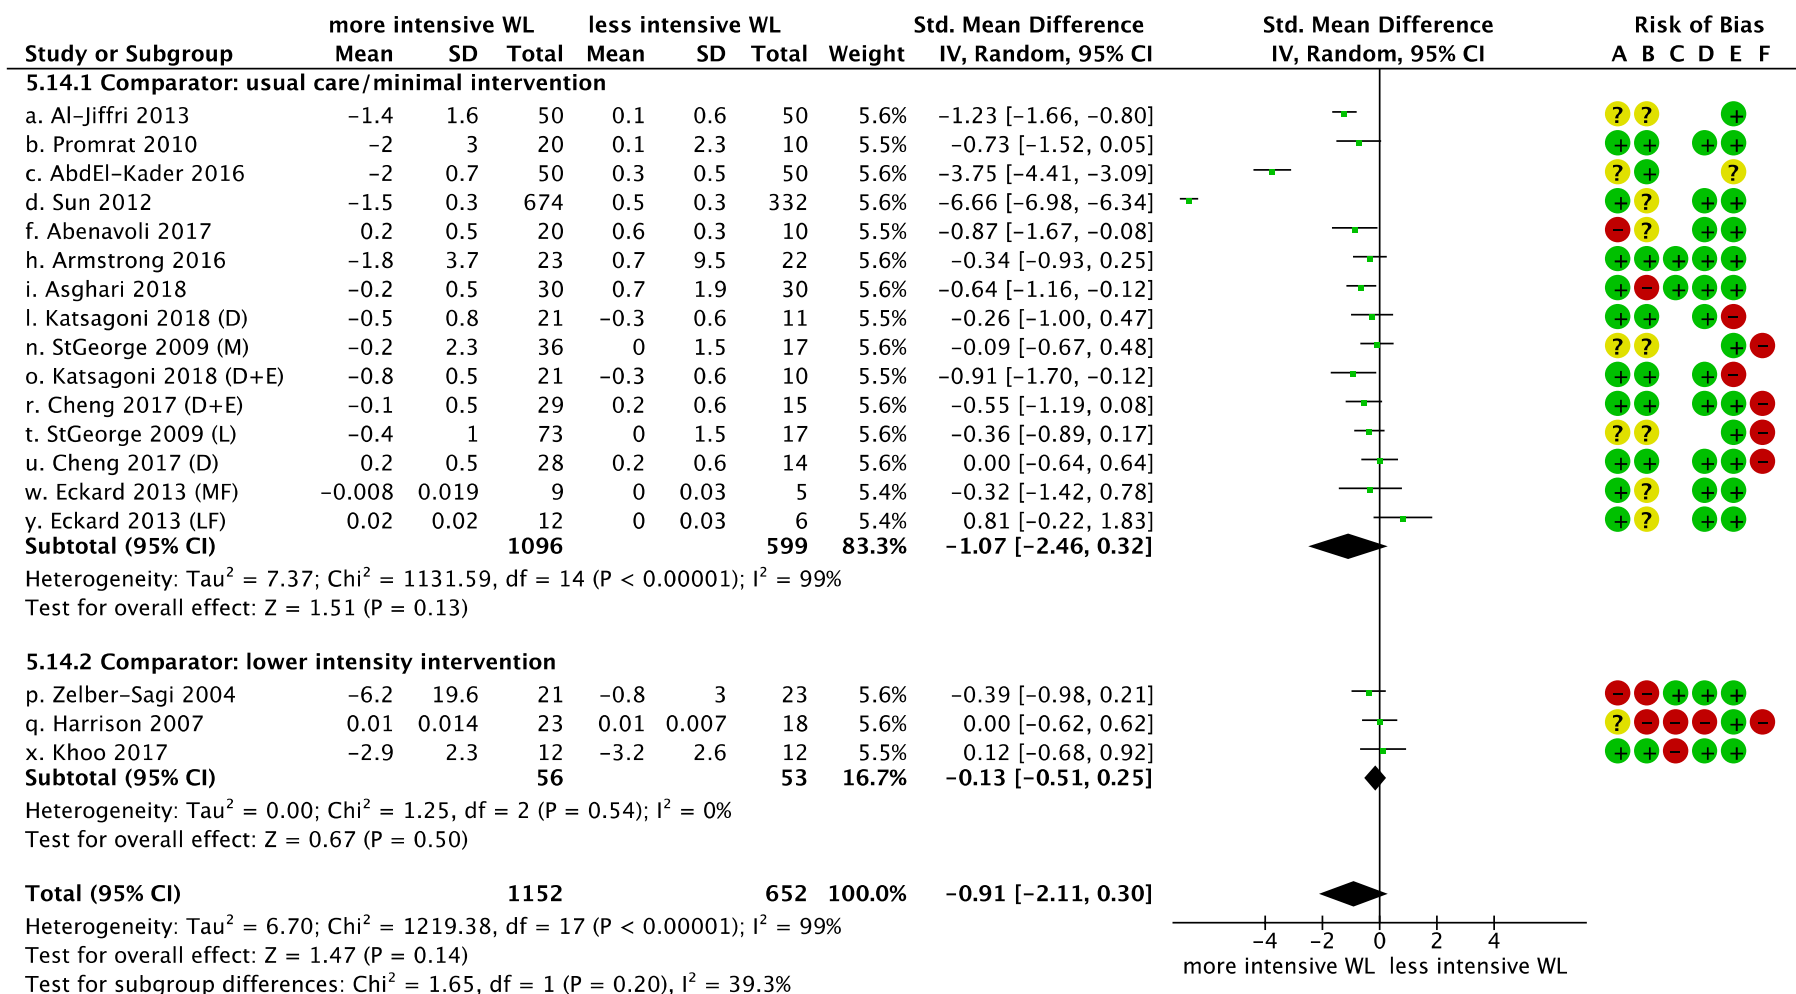

eFigure 6.4 Insulin (pmol/L) by the intensity of the comparator intervention

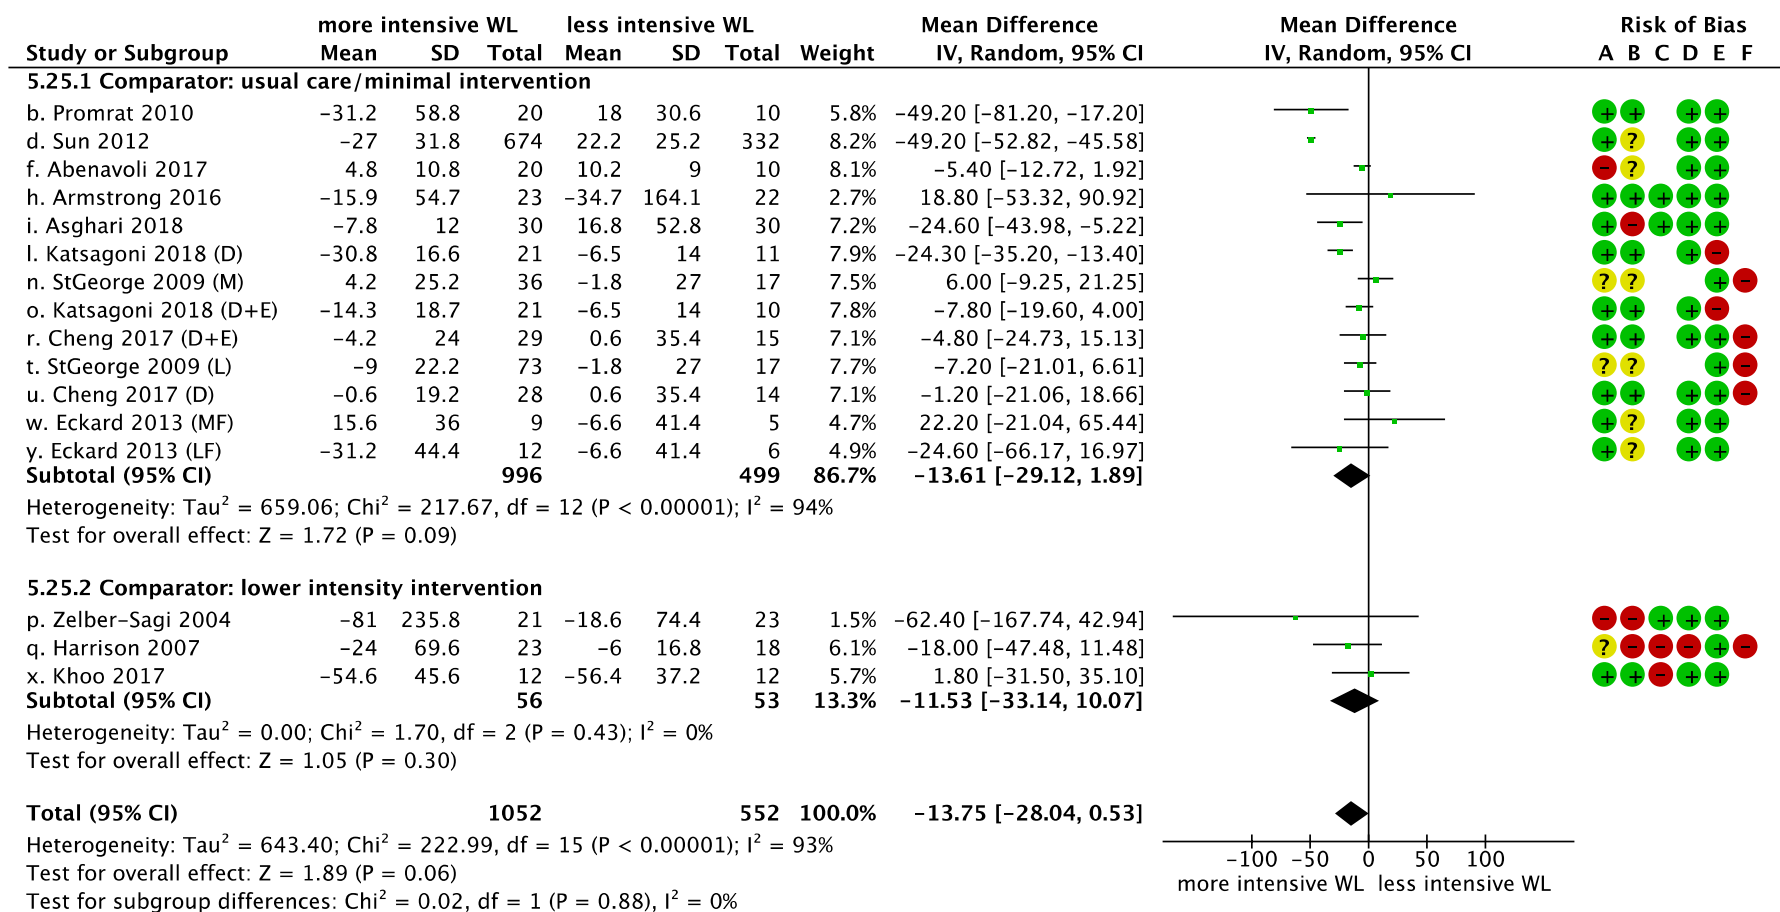

eFigure 6.5 ALT (U/L) by the intensity of the comparator intervention

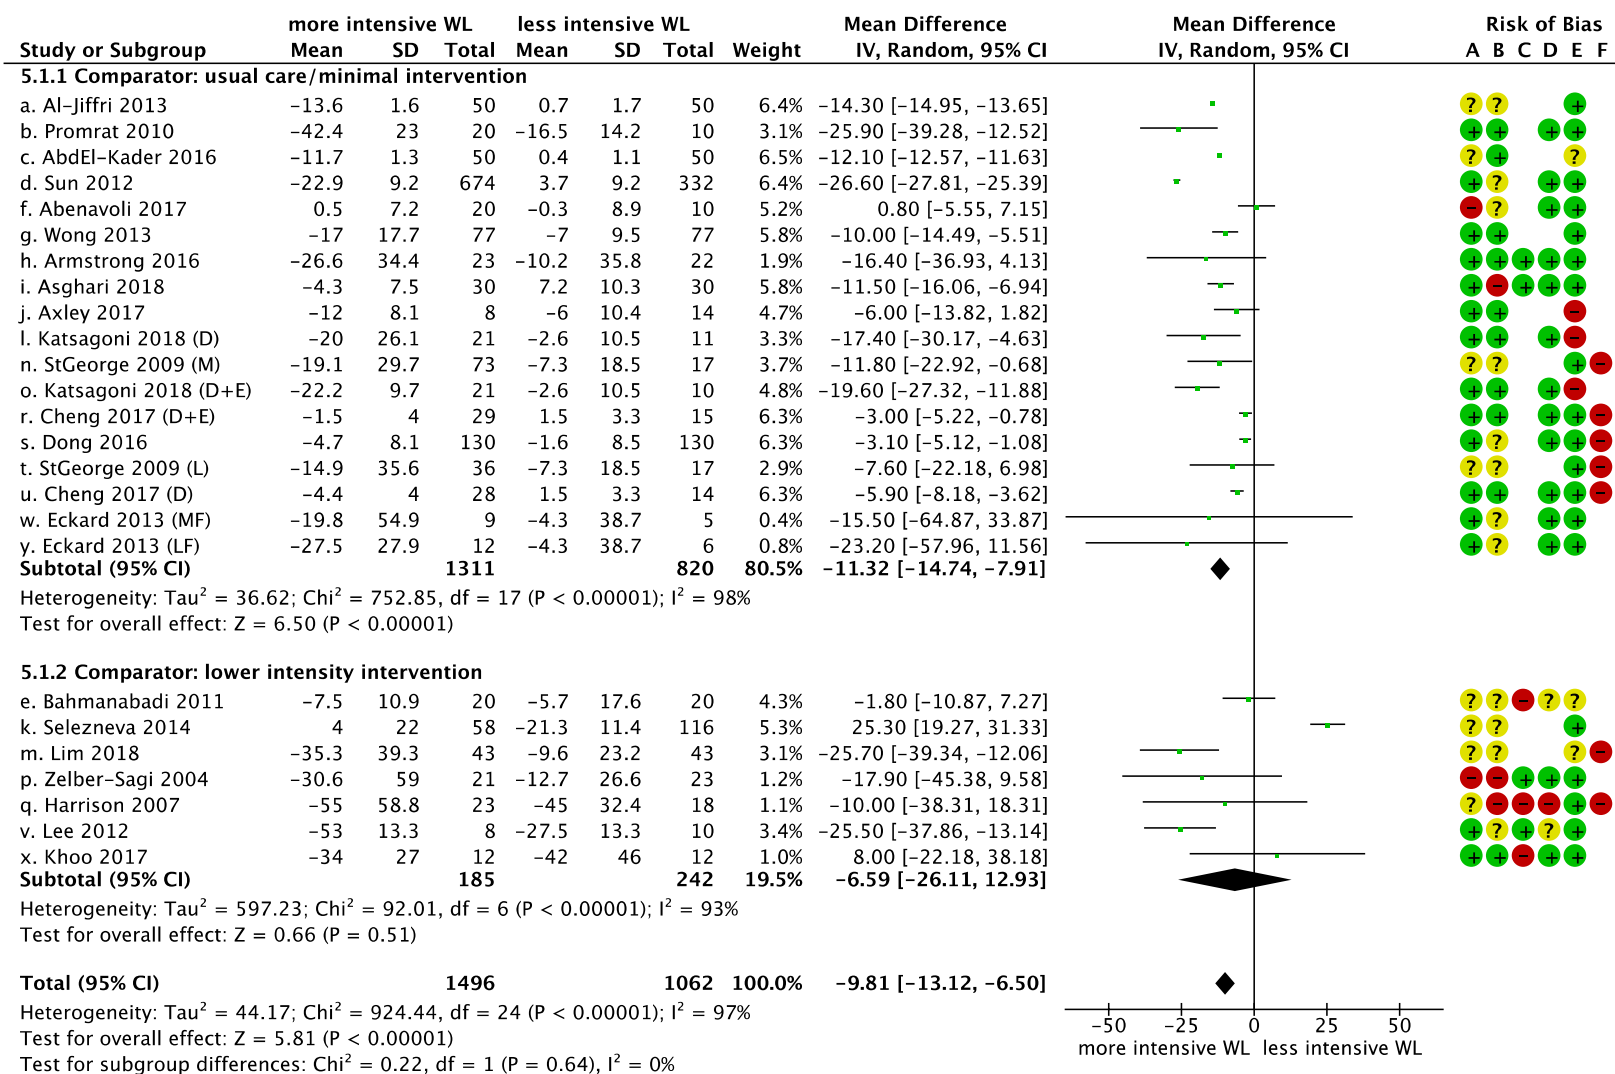

eFigure 6.6 AST (U/L) by the intensity of the comparator intervention

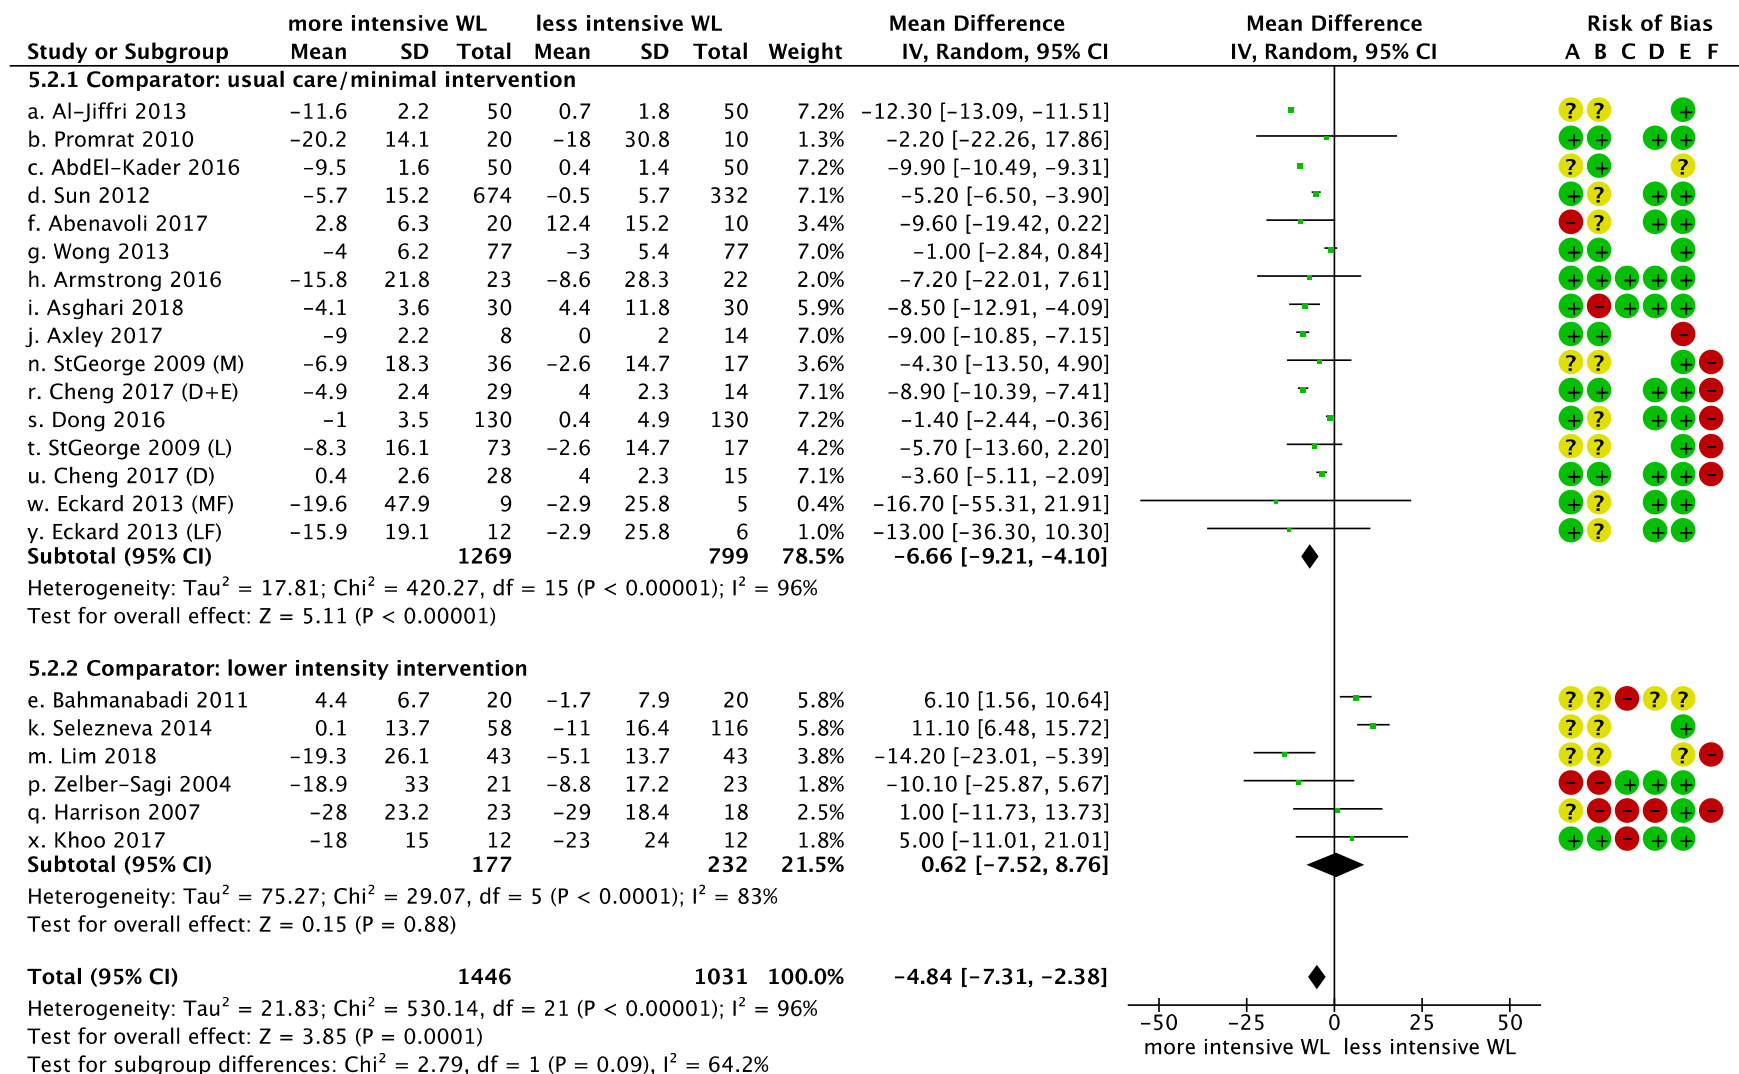

eFigure 6.7 Steatosis by the intensity of the comparator intervention

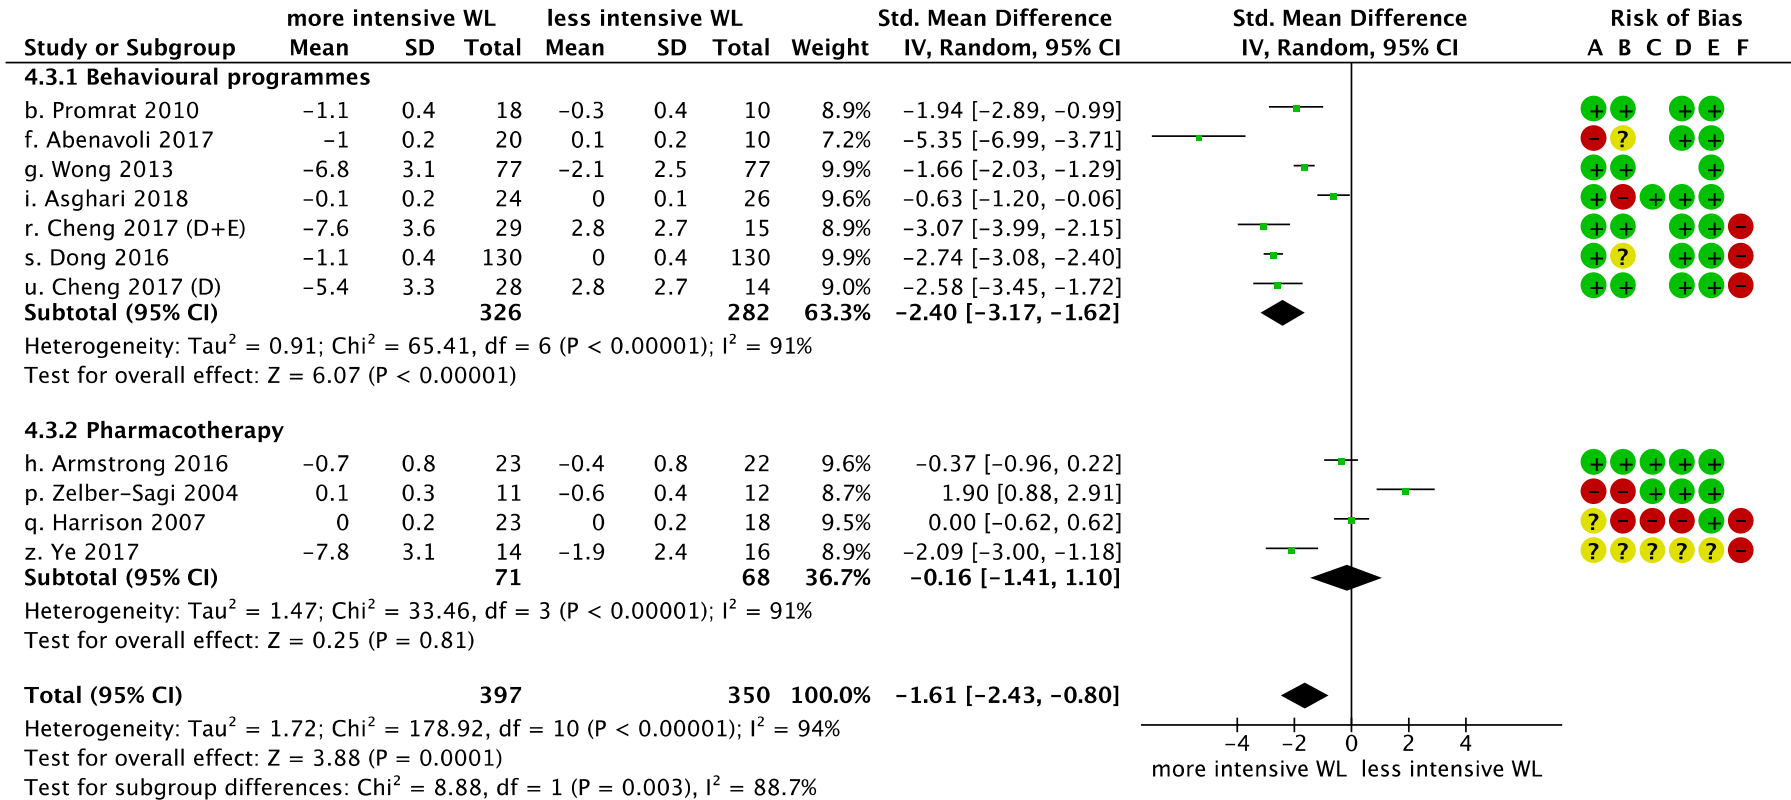

## 7 Subgroup analysis by the presence/absence of a minimum cut-off in the eligibility criteria for including only people with overweight/obesity

eFigure 7.1 Weight loss by the presence of a minimum overweight/obesity cut-off

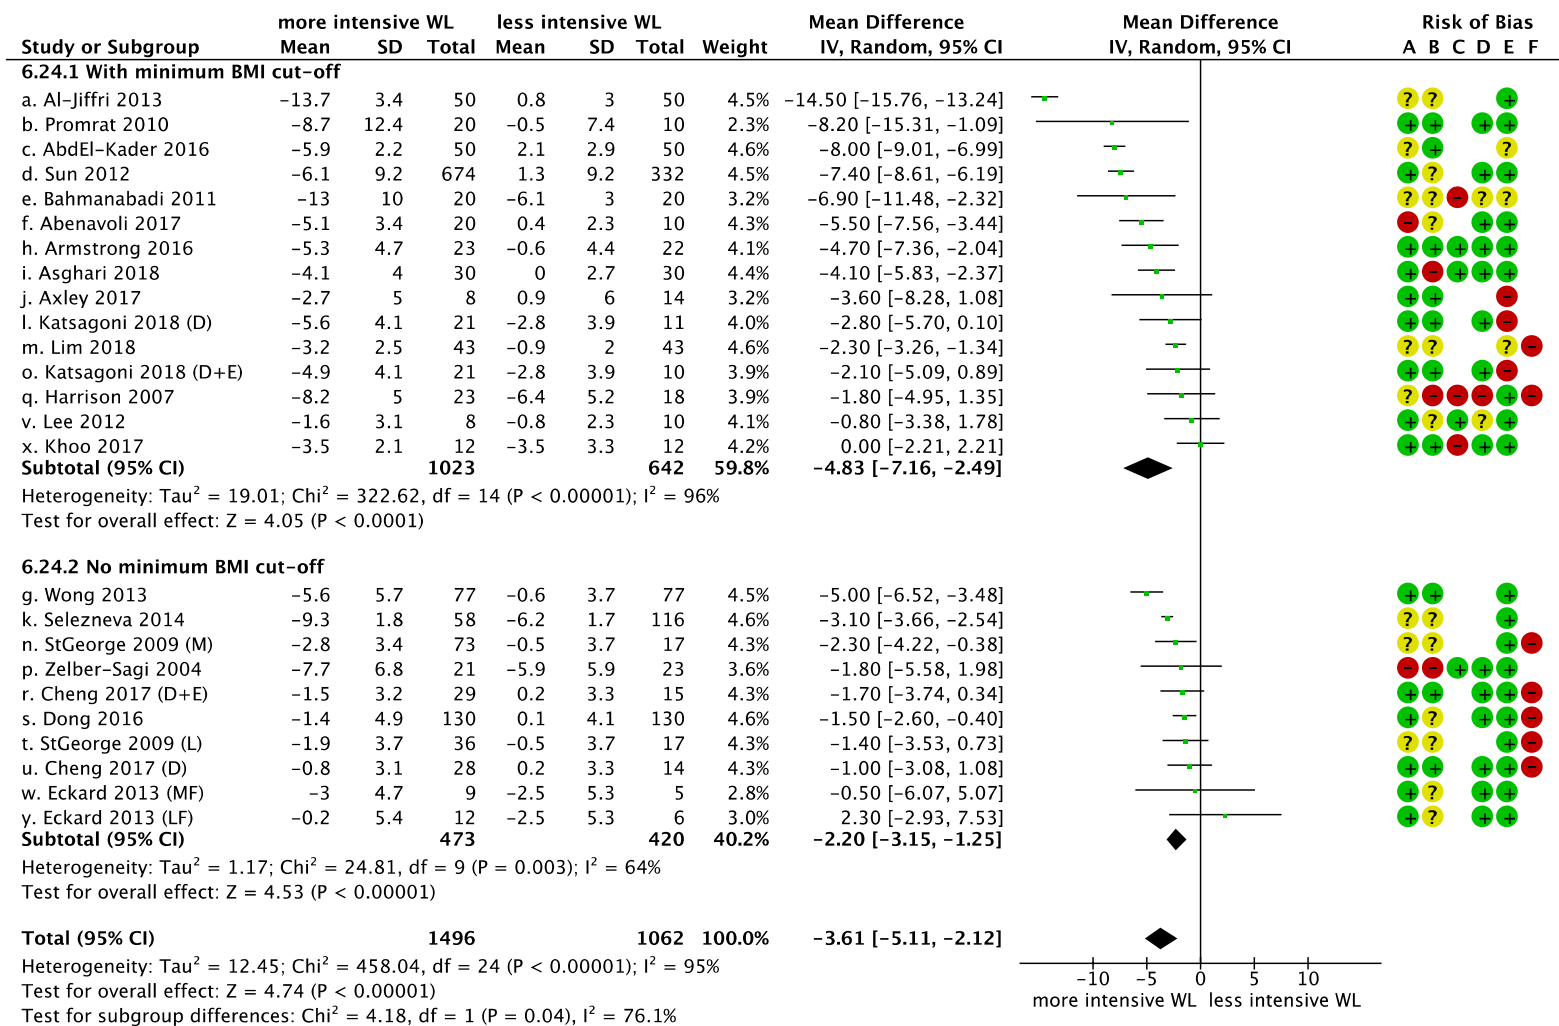

eFigure 7.2 Glucose (mmol/L) by the presence of a minimum overweight/obesity cut-off

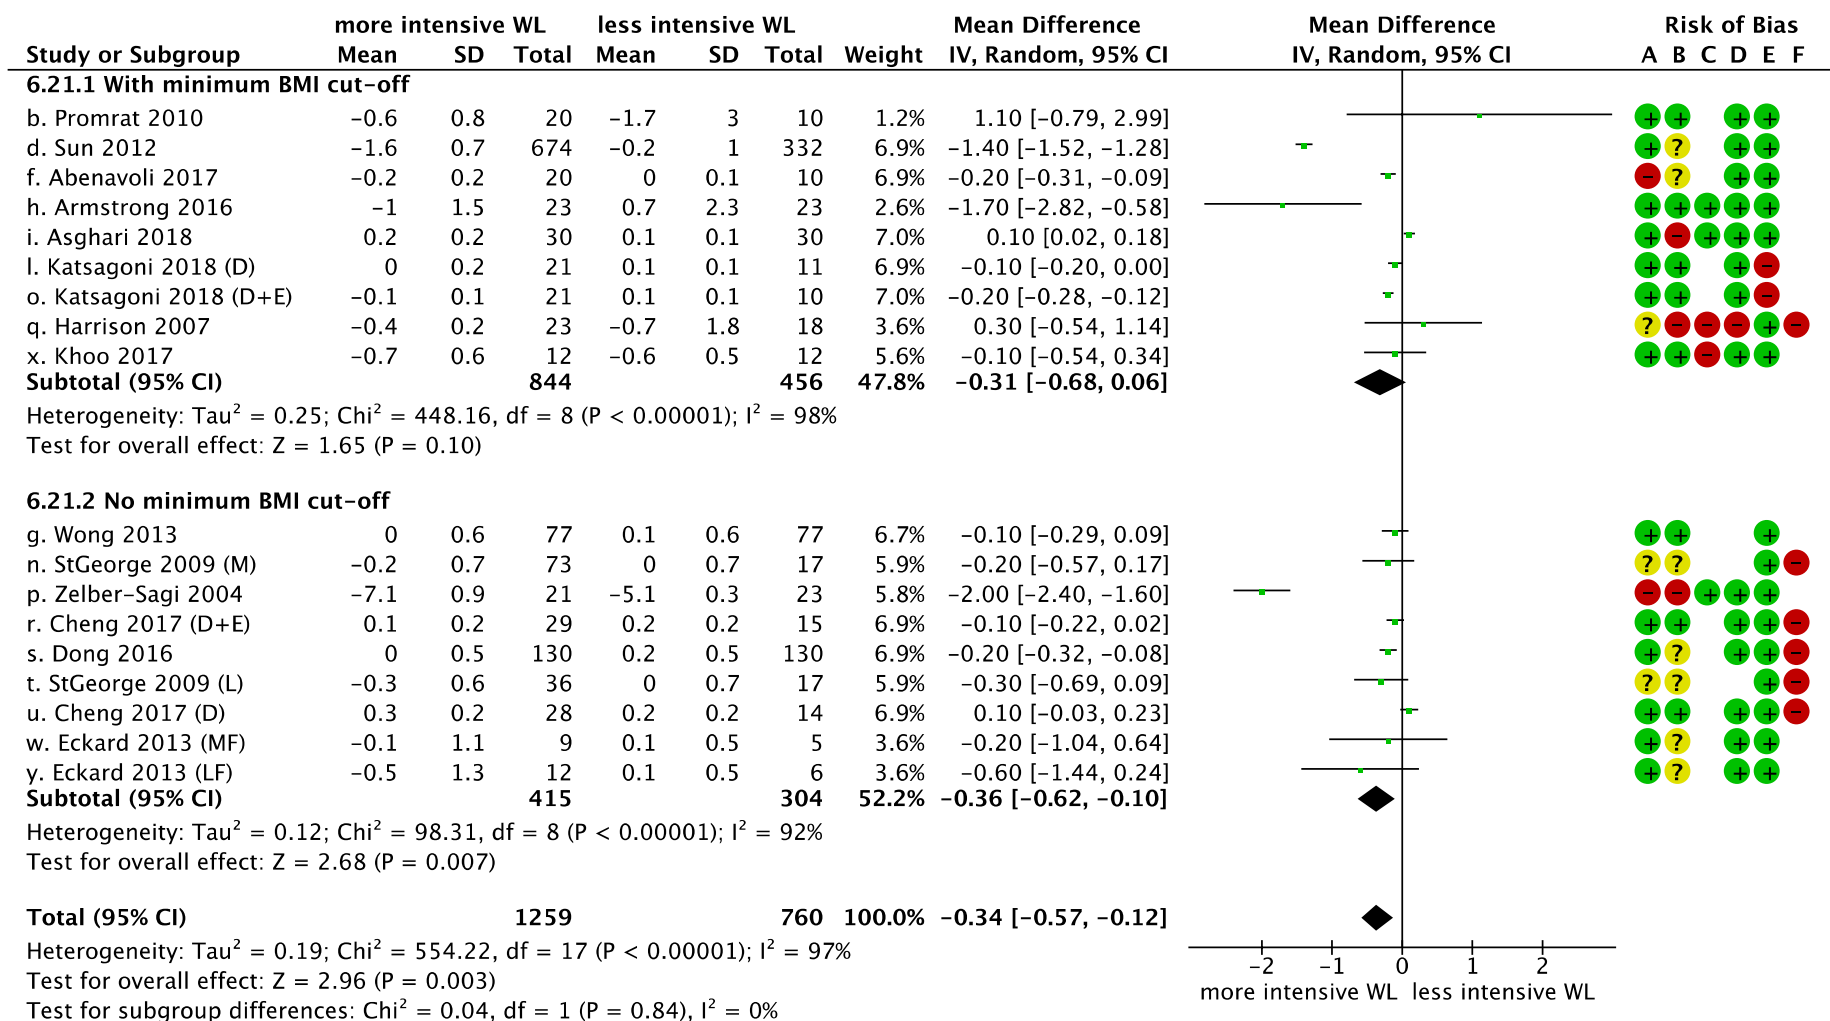

eFigure 7.3 Insulin resistance index (HOMA-IR or other) by the presence of a minimum overweight/obesity cut-off

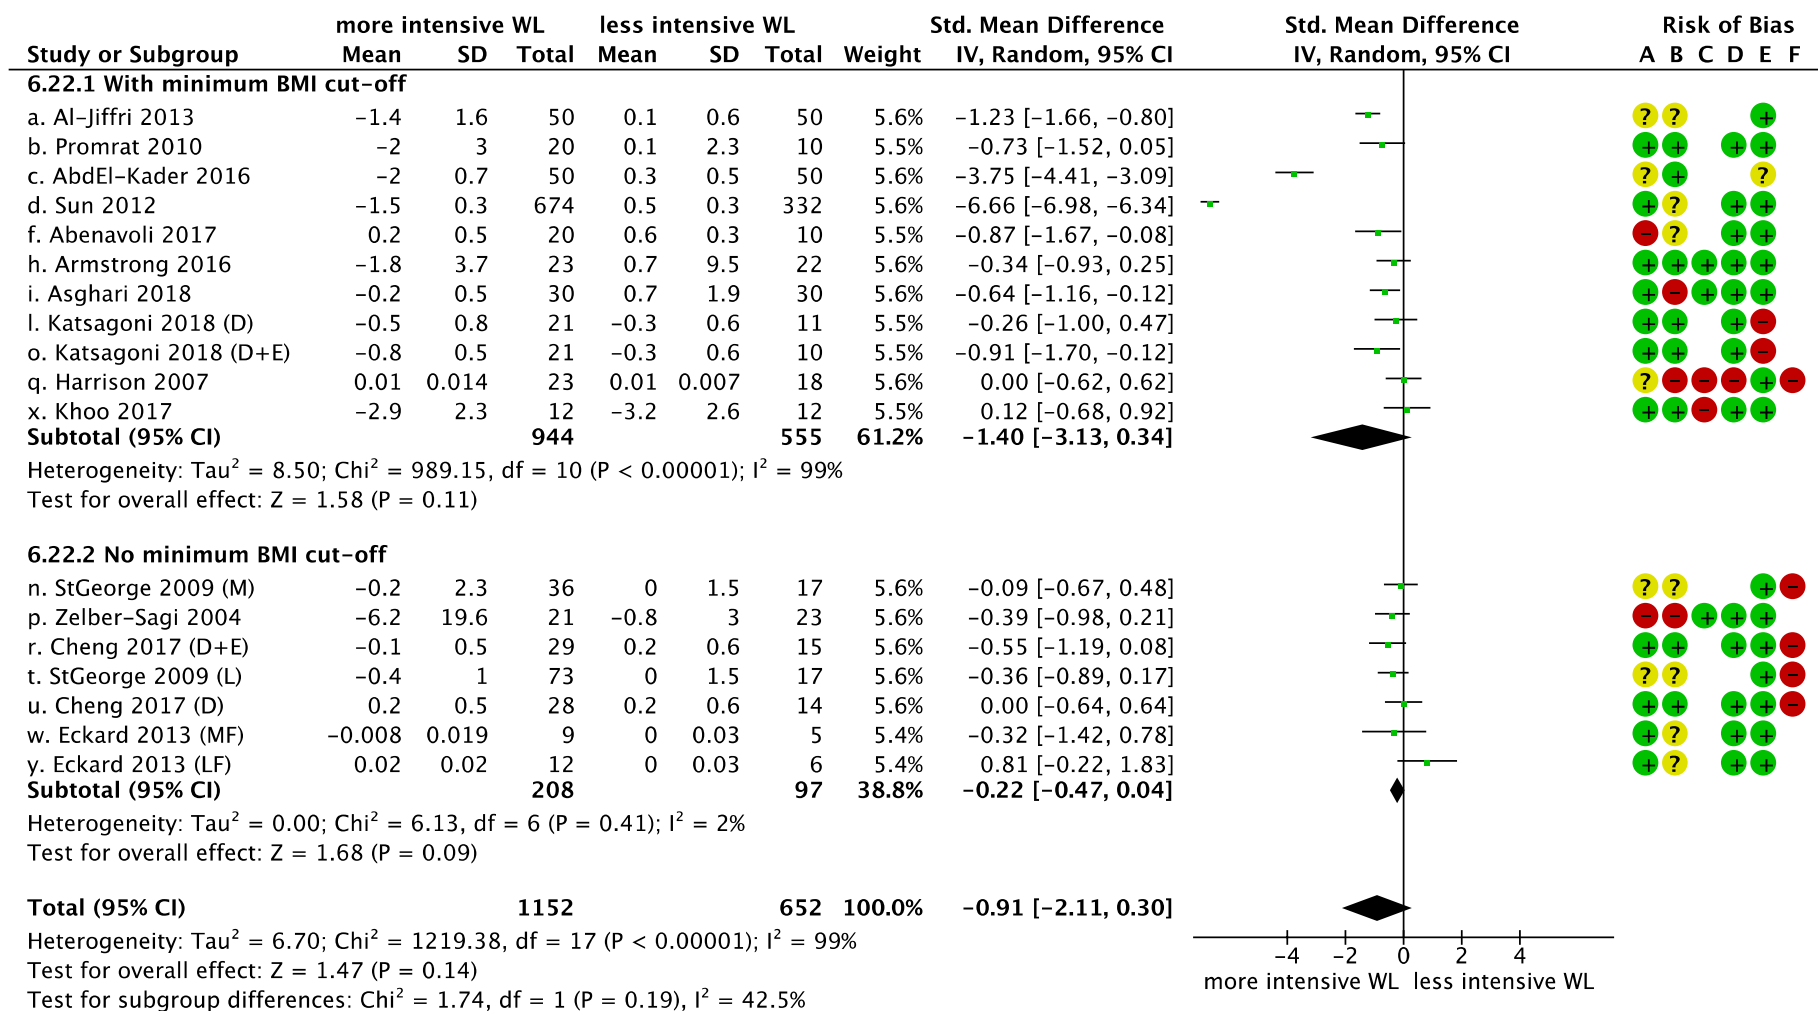



eFigure 7.4 Insulin (pmol/L) by the presence of a minimum overweight/obesity cut-off

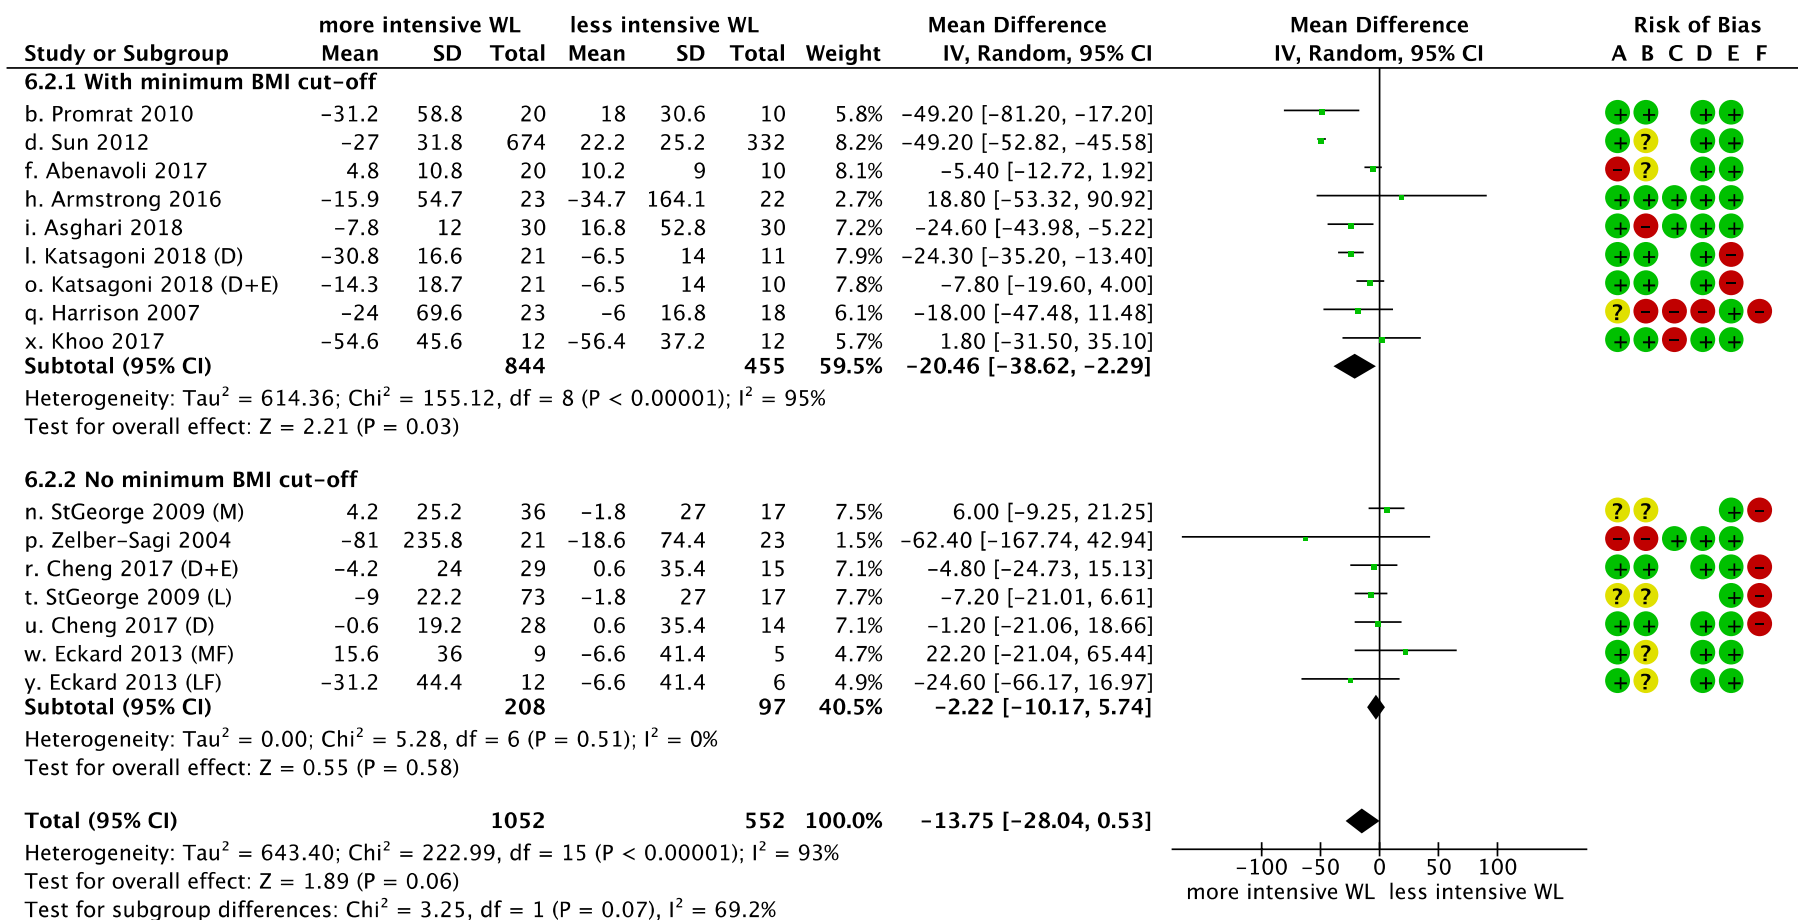

eFigure 7.5 ALT (U/L) by the presence of a minimum overweight/obesity cut-off

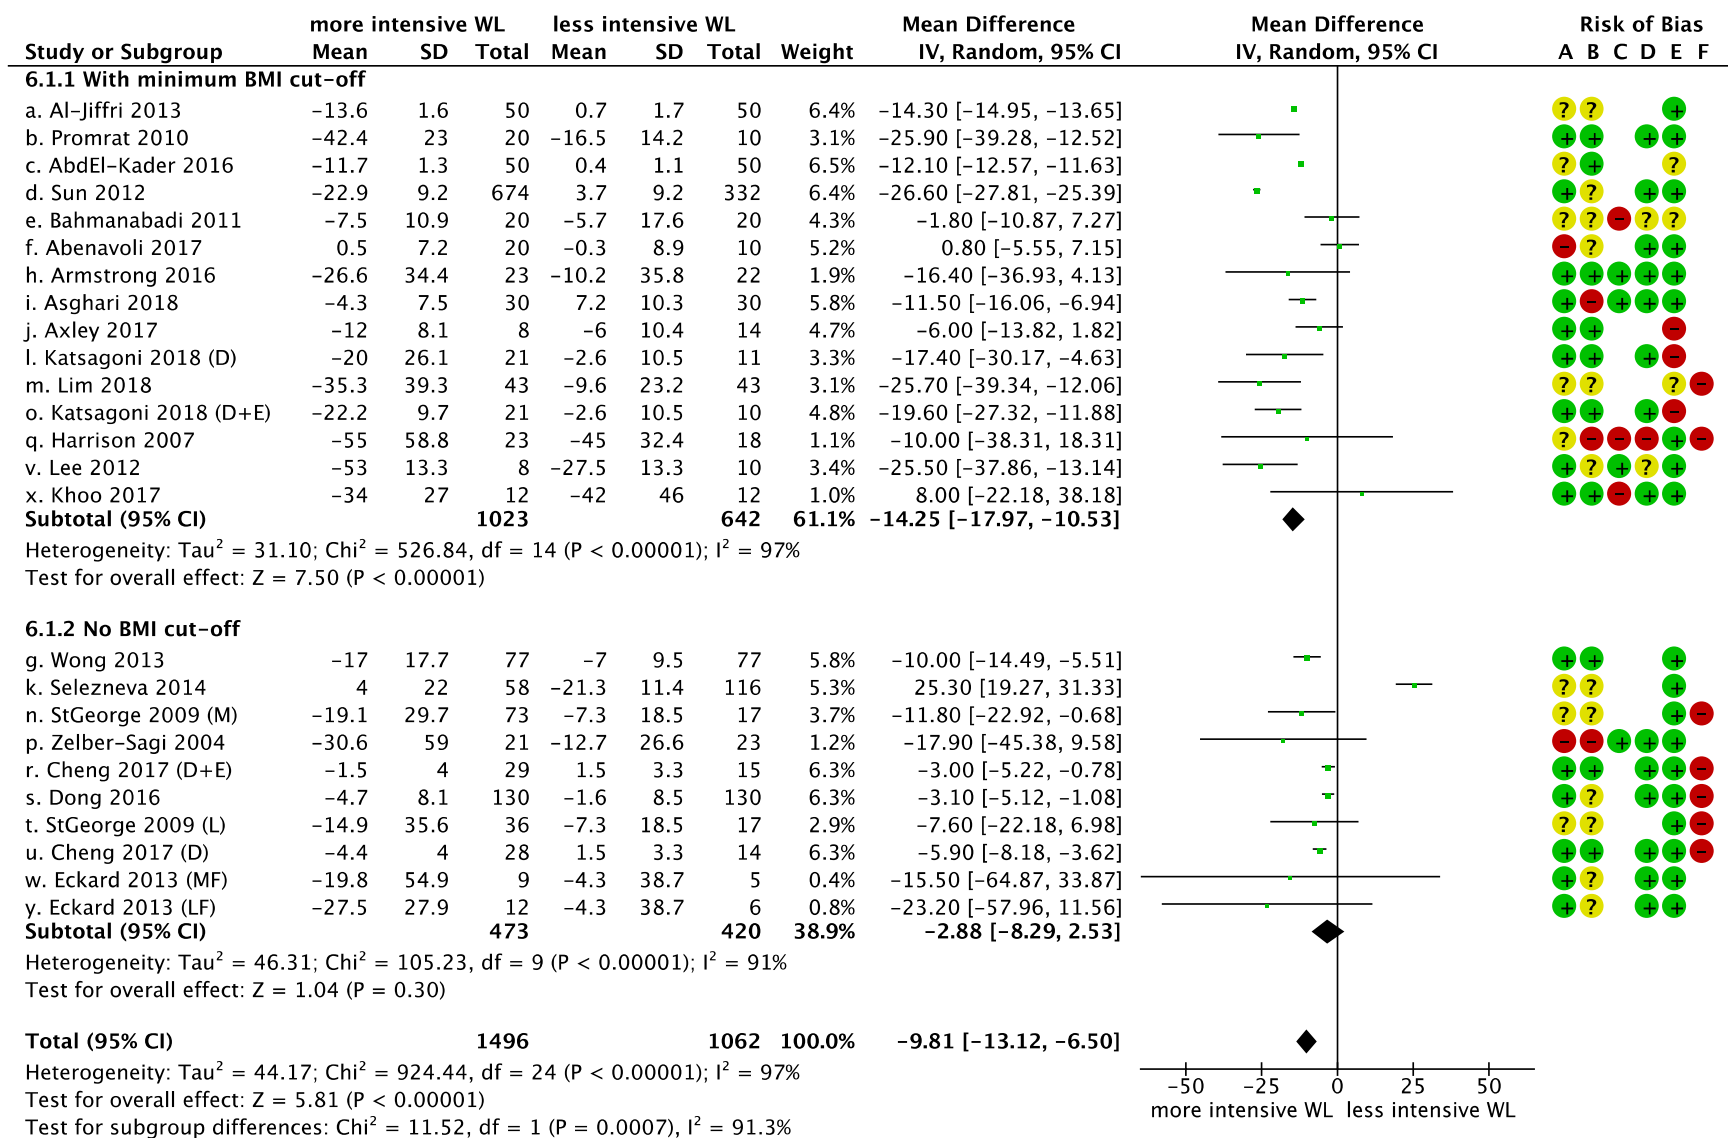

eFigure 7.6 AST (U/L) by the presence of a minimum overweight/obesity cut-off

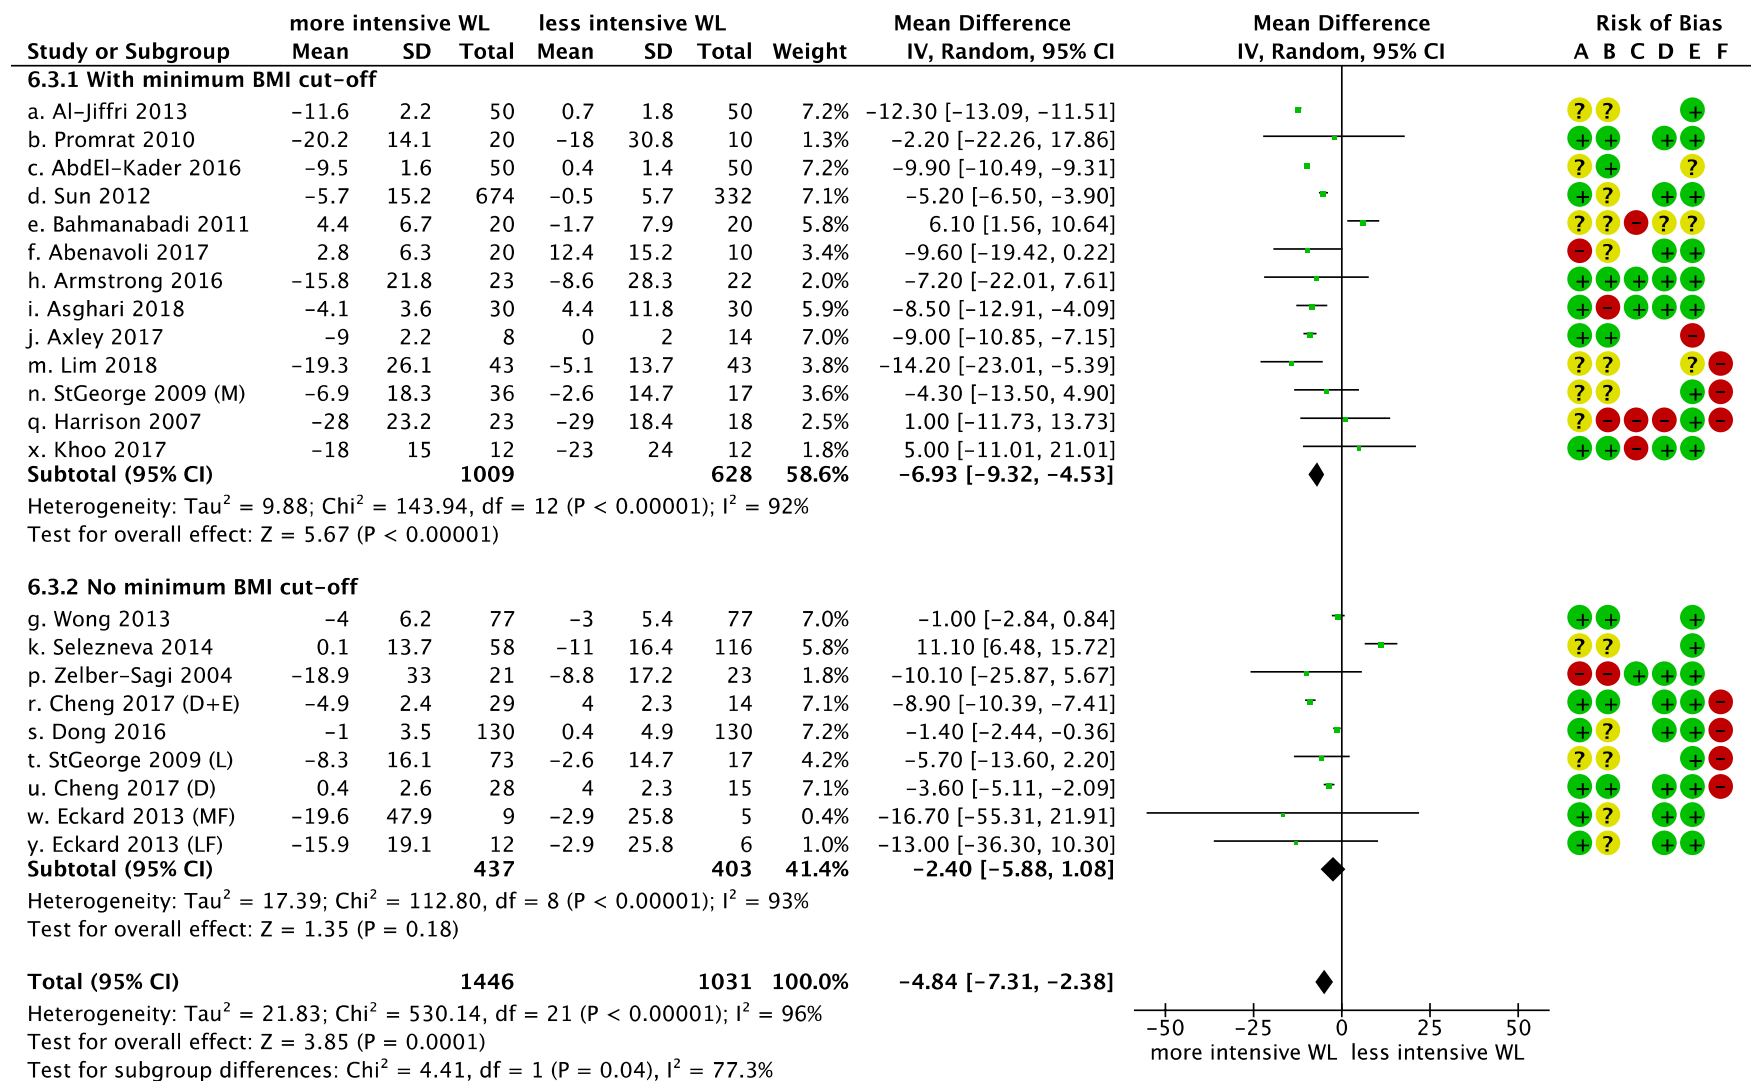

eFigure 7.7 Steatosis (Standardized Mean Difference as Assessed by Histologic Examination, MRI, or Ultrasonography) by the Presence of a Minimum Overweight/Obesity Cut-off

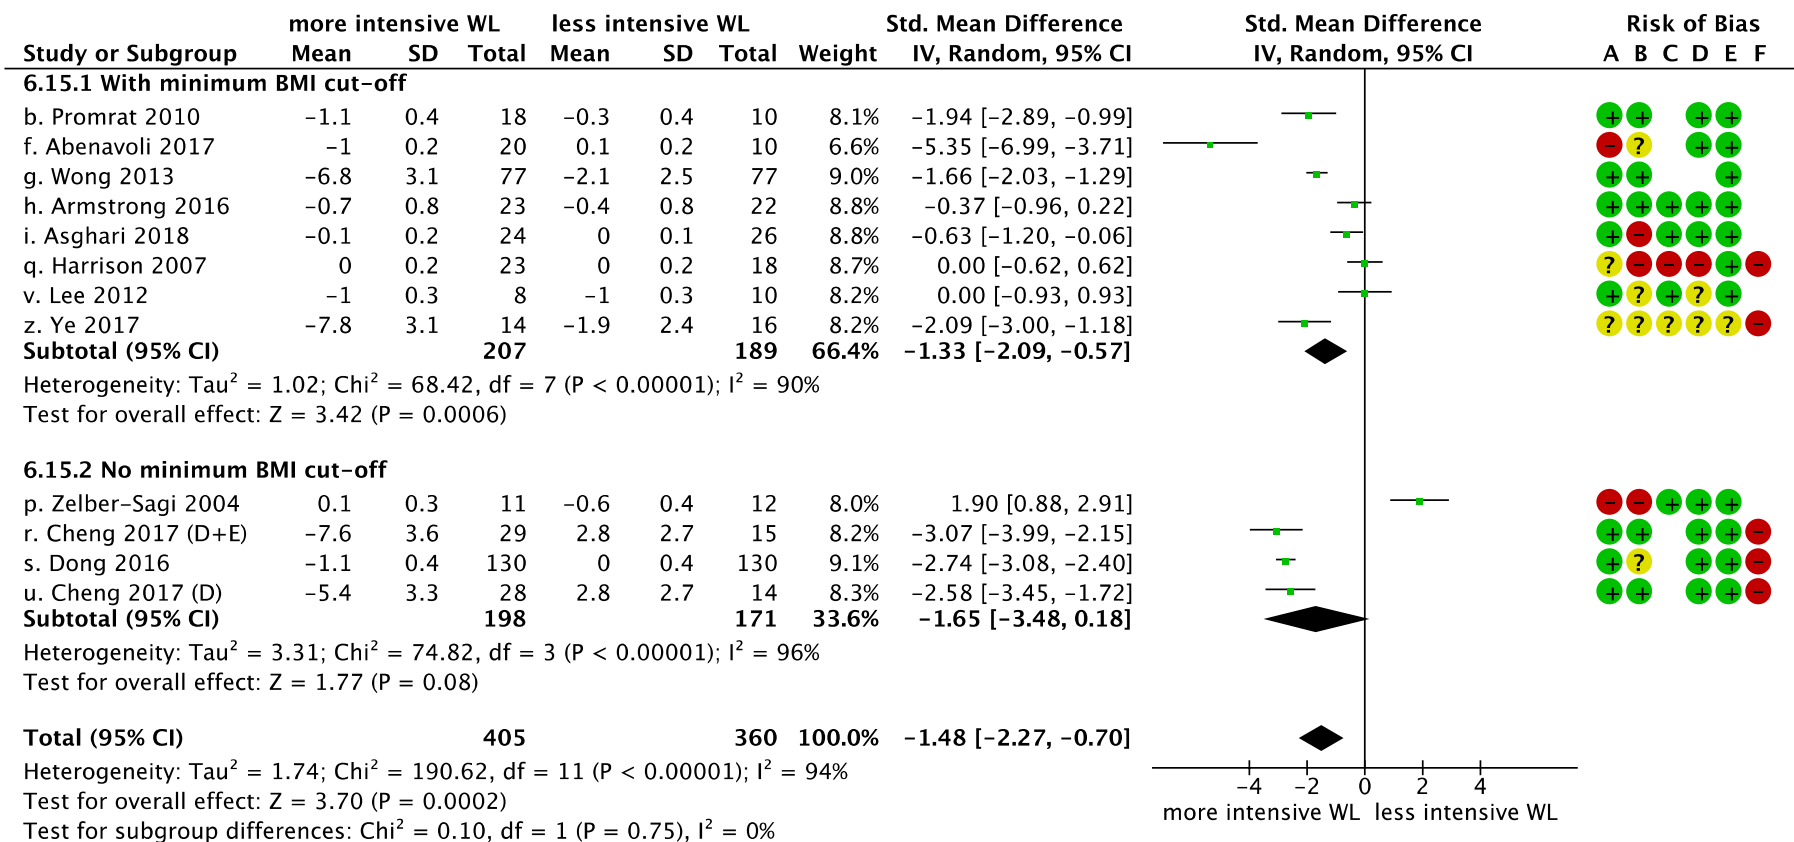

## 8 Subgroup analysis by the severity of the disease (NAFLD vs NASH)

eFigure 8.1 Fibrosis (stage F0-F4)

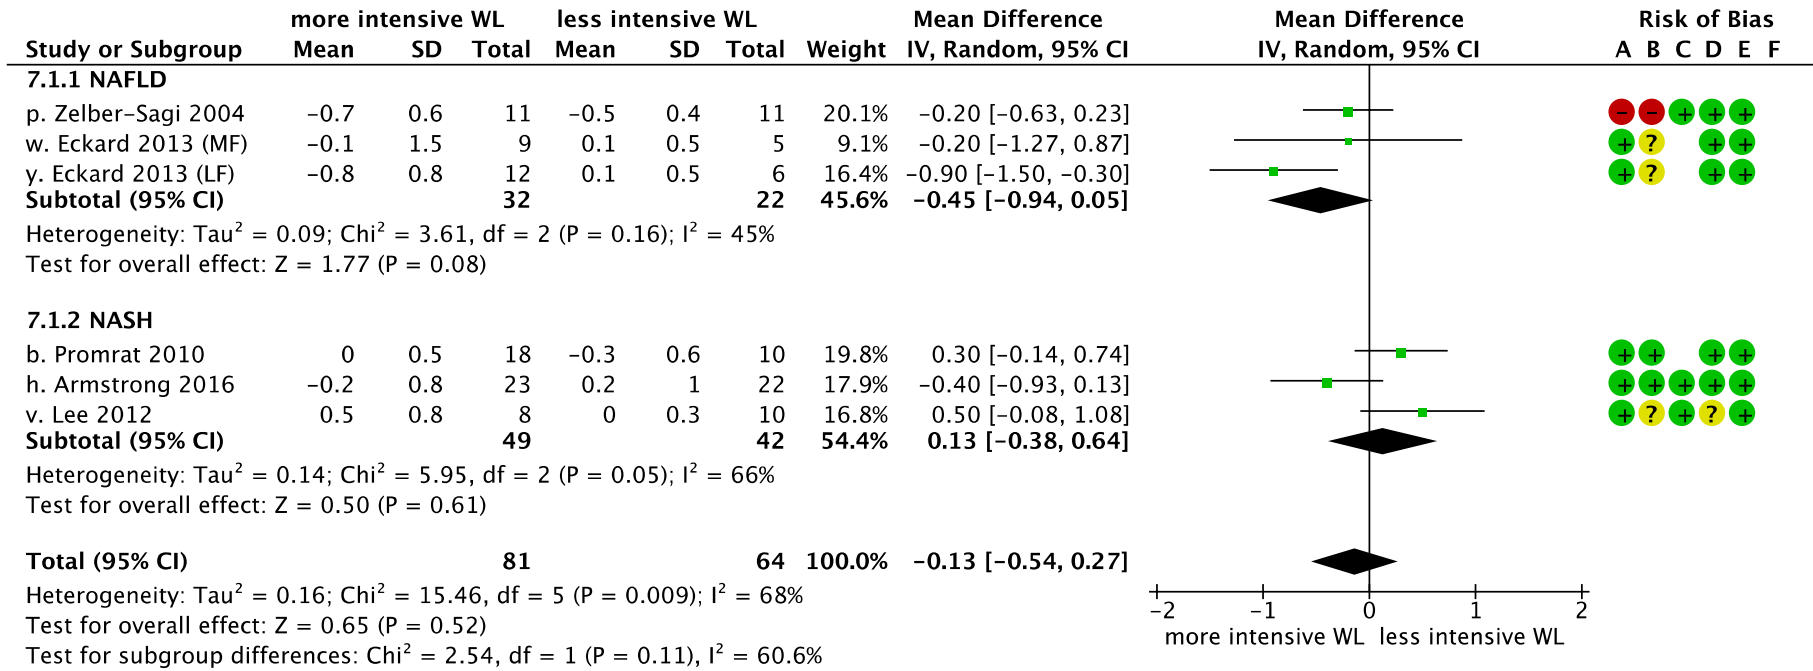

## 9 eMethods: Search strategy

### Medline

|    | Searches                                                                                                                                                                 |
|----|--------------------------------------------------------------------------------------------------------------------------------------------------------------------------|
| 1  | Non-alcoholic Fatty Liver Disease/                                                                                                                                       |
| 2  | *Fatty Liver/                                                                                                                                                            |
| 3  | ((nonalcoholic or non-alcoholic) adj5 (fatty liver or steatohepatitis)).ti,ab.                                                                                           |
| 4  | (fatty liver or steatohepatitis).ti.                                                                                                                                     |
| 5  | (nafld or nash).ti,ab.                                                                                                                                                   |
| 6  | 1 or 2 or 3 or 4 or 5                                                                                                                                                    |
| 7  | Weight Loss/                                                                                                                                                             |
| 8  | Weight Reduction Programs/                                                                                                                                               |
| 9  | diet therapy/ or caloric restriction/ or diet, reducing/                                                                                                                 |
| 10 | exp Obesity/dh [Diet Therapy]                                                                                                                                            |
| 11 | (weight adj3 (loss or lose or lost or losing or chang* or reduc* or manag*)).ti,ab.                                                                                      |
| 12 | ((energy or calori*) adj2 (reduc* or restrict)).ti,ab.                                                                                                                   |
| 13 | ((weight or overweight or obes*) adj5 (program* or service? or intervention?)).ti,ab.                                                                                    |
| 14 | exp Anti-Obesity Agents/                                                                                                                                                 |
| 15 | exp Obesity/dt, th [Drug Therapy, Therapy]                                                                                                                               |
| 16 | ((weight or overweight or obes*) adj3 (therap* or treat* or drug? or agent?)).ti,ab.                                                                                     |
| 17 | exp OBESITY/su [Surgery]                                                                                                                                                 |
| 18 | exp Bariatric Surgery/                                                                                                                                                   |
| 19 | ((weight loss or bariatric or obes*) adj5 surg*).ti,ab. or bariatric*.ti.                                                                                                |
| 20 | ((((gastric or jejunoileal) adj3 (band* or bypass* or balloon* or diver*)) or gastrectom* or gastroplast* or ((biliopancreatic or bilio-pancreatic) adj2 diver*)).ti,ab. |
| 21 | obesity management/ or bariatrics/                                                                                                                                       |
| 22 | ((obes* or overweight) adj3 manage*).ti,ab.                                                                                                                              |
| 23 | 7 or 8 or 9 or 10 or 11 or 12 or 13 or 14 or 15 or 16 or 17 or 18 or 19 or 20 or 21 or 22                                                                                |
| 24 | randomized controlled trial.pt.                                                                                                                                          |
| 25 | controlled clinical trial.pt.                                                                                                                                            |
| 26 | randomized.ab.                                                                                                                                                           |
| 27 | placebo.ab.                                                                                                                                                              |
| 28 | drug therapy.fs.                                                                                                                                                         |
| 29 | randomly.ab.                                                                                                                                                             |
| 30 | trial.ab.                                                                                                                                                                |
| 31 | groups.ab.                                                                                                                                                               |
| 32 | 24 or 25 or 26 or 27 or 28 or 29 or 30 or 31                                                                                                                             |
| 33 | exp animals/ not humans.sh.                                                                                                                                              |
| 34 | 32 not 33                                                                                                                                                                |
| 35 | 6 and 23 and 34                                                                                                                                                          |

## Embase

|    | Searches                                                                                                                                                               |
|----|------------------------------------------------------------------------------------------------------------------------------------------------------------------------|
| 1  | nonalcoholic fatty liver/                                                                                                                                              |
| 2  | *Fatty Liver/                                                                                                                                                          |
| 3  | ((nonalcoholic or non-alcoholic) adj5 (fatty liver or steatohepatitis)).ti,ab.                                                                                         |
| 4  | (fatty liver or steatohepatitis).ti.                                                                                                                                   |
| 5  | (nafld or nash).ti,ab.                                                                                                                                                 |
| 6  | 1 or 2 or 3 or 4 or 5                                                                                                                                                  |
| 7  | weight reduction/                                                                                                                                                      |
| 8  | weight loss program/                                                                                                                                                   |
| 9  | diet therapy/ or exp diet restriction/ or low calory diet/ or low fat diet/                                                                                            |
| 10 | exp Obesity/dm                                                                                                                                                         |
| 11 | (weight adj3 (loss or lose or lost or losing or chang* or reduc* or manag*)).ti,ab.                                                                                    |
| 12 | ((energy or calori*) adj2 (reduc* or restrict)).ti,ab.                                                                                                                 |
| 13 | ((weight or overweight or obes*) adj5 (program* or service? or intervention?)).ti,ab.                                                                                  |
| 14 | exp antiobesity agent/                                                                                                                                                 |
| 15 | exp Obesity/dt, th                                                                                                                                                     |
| 16 | ((weight or overweight or obes*) adj3 (therap* or treat* or drug? or agent?)).ti,ab.                                                                                   |
| 17 | exp OBESITY/su                                                                                                                                                         |
| 18 | exp Bariatric Surgery/                                                                                                                                                 |
| 19 | ((weight loss or bariatric or obes*) adj5 surg*).ti,ab. or bariatric*.ti.                                                                                              |
| 20 | ((((gastric or jejunoileal) adj3 (band* or bypass* or balloon* or diver*)) or gastrectom* or gastroplast* or (biliopancreatic or bilio-pancreatic) adj2 diver*).ti,ab. |
| 21 | obesity management/ or bariatrics/                                                                                                                                     |
| 22 | ((obes* or overweight) adj3 manage*).ti,ab.                                                                                                                            |
| 23 | 7 or 8 or 9 or 10 or 11 or 12 or 13 or 14 or 15 or 16 or 17 or 18 or 19 or 20 or 21 or 22                                                                              |
| 24 | 6 and 23                                                                                                                                                               |
| 25 | randomized controlled trial/                                                                                                                                           |
| 26 | single blind procedure/ or double blind procedure/                                                                                                                     |
| 27 | crossover procedure/                                                                                                                                                   |
| 28 | random*.tw.                                                                                                                                                            |
| 29 | (random or ((singl* or doubl*) adj (blind* or mask*)) or crossover or cross over or factorial* or latin square or assign* or allocat* or volunteer*).ti,ab.            |
| 30 | 25 or 26 or 27 or 28 or 29                                                                                                                                             |
| 31 | (exp animals/ or nonhuman/) not human/                                                                                                                                 |
| 32 | 30 not 31                                                                                                                                                              |
| 33 | 24 and 32                                                                                                                                                              |

**PsycINFO**

|    | Searches                                                                                                                                                                 |
|----|--------------------------------------------------------------------------------------------------------------------------------------------------------------------------|
| 1  | ((nonalcoholic or non-alcoholic) adj5 (fatty liver or steatohepatitis)).ti,ab.                                                                                           |
| 2  | (fatty liver or steatohepatitis).ti.                                                                                                                                     |
| 3  | (nafld or nash).ti,ab.                                                                                                                                                   |
| 4  | 1 or 2 or 3                                                                                                                                                              |
| 5  | weight loss/ or weight control/                                                                                                                                          |
| 6  | (weight adj3 (loss or lose or lost or losing or chang* or reduc* or manag*)).ti,ab.                                                                                      |
| 7  | ((energy or kalori*) adj2 (reduc* or restrict)).ti,ab.                                                                                                                   |
| 8  | ((weight or overweight or obes*) adj5 (program* or service? or intervention?)).ti,ab.                                                                                    |
| 9  | ((weight or overweight or obes*) adj3 (therap* or treat* or drug? or agent?)).ti,ab.                                                                                     |
| 10 | bariatric surgery/                                                                                                                                                       |
| 11 | ((weight loss or bariatric or obes*) adj5 surg*).ti,ab. or bariatric*.ti.                                                                                                |
| 12 | ((((gastric or jejunoileal) adj3 (band* or bypass* or balloon* or diver*)) or gastrectom* or gastroplast* or ((biliopancreatic or bilio-pancreatic) adj2 diver*)).ti,ab. |
| 13 | ((obes* or overweight) adj3 manage*).ti,ab.                                                                                                                              |
| 14 | 5 or 6 or 7 or 8 or 9 or 10 or 11 or 12 or 13                                                                                                                            |
| 15 | 4 and 14                                                                                                                                                                 |
| 16 | random*.ti,ab,hw,id.                                                                                                                                                     |
| 17 | trial*.ti,ab,hw,id.                                                                                                                                                      |
| 18 | controlled stud*.ti,ab,hw,id.                                                                                                                                            |
| 19 | placebo*.ti,ab,hw,id.                                                                                                                                                    |
| 20 | ((singl* or doubl* or trebl* or tripl*) and (blind* or mask*)).ti,ab,hw,id.                                                                                              |
| 21 | (cross over or crossover or factorial* or latin square).ti,ab,hw,id.                                                                                                     |
| 22 | (assign* or allocat* or volunteer*).ti,ab,hw,id.                                                                                                                         |
| 23 | treatment effectiveness evaluation/                                                                                                                                      |
| 24 | mental health program evaluation/                                                                                                                                        |
| 25 | exp experimental design/                                                                                                                                                 |
| 26 | (clinical trial or treatment outcome).md.                                                                                                                                |
| 27 | 16 or 17 or 18 or 19 or 20 or 21 or 22 or 23 or 24 or 25 or 26                                                                                                           |
| 28 | 15 and 27                                                                                                                                                                |



## Cinahl

| #   | Query                                                                                                                                                                                                                                                                                                                                                                                                                                                                         |
|-----|-------------------------------------------------------------------------------------------------------------------------------------------------------------------------------------------------------------------------------------------------------------------------------------------------------------------------------------------------------------------------------------------------------------------------------------------------------------------------------|
| S14 | S3 AND S12 Limiters - Clinical Queries: Therapy - Best Balance                                                                                                                                                                                                                                                                                                                                                                                                                |
| S13 | S3 AND S12                                                                                                                                                                                                                                                                                                                                                                                                                                                                    |
| S12 | S4 OR S5 OR S6 OR S7 OR S8 OR S9 OR S10 OR S11                                                                                                                                                                                                                                                                                                                                                                                                                                |
| S11 | (MH "Obesity+/DH/DT/SU/TH")                                                                                                                                                                                                                                                                                                                                                                                                                                                   |
| S10 | TI ( ((weight loss or bariatric or obes*) N5 surg*) ) OR AB ( ((weight loss or bariatric or obes*) N5 surg*) ) OR TI bariatric* OR TI ( (((gastric or jejunoileal) N3 (band* or bypass* or balloon* or diver*)) or gastrectom* or gastroplast* or ((biliopancreatic or bilio-pancreatic) N2 diver*)) ) OR AB ( (((gastric or jejunoileal) N3 (band* or bypass* or balloon* or diver*)) or gastrectom* or gastroplast* or ((biliopancreatic or bilio-pancreatic) N2 diver*)) ) |
| S9  | (MH "Bariatric Surgery+")                                                                                                                                                                                                                                                                                                                                                                                                                                                     |
| S8  | TI ( ((weight or overweight or obes*) N3 (therap* or treat* or drug? or agent?)) ) AND AB ( ((weight or overweight or obes*) N3 (therap* or treat* or drug? or agent?)) )                                                                                                                                                                                                                                                                                                     |
| S7  | (MH "Antiobesity Agents+")                                                                                                                                                                                                                                                                                                                                                                                                                                                    |
| S6  | TI ( (weight N3 (loss or lose or lost or losing or chang* or reduc* or manag*)) ) OR AB ( (weight N3 (loss or lose or lost or losing or chang* or reduc* or manag*)) ) OR TI ( ((energy or calori*) N2 (reduc* or restrict)) ) OR AB ( ((energy or calori*) N2 (reduc* or restrict)) ) OR TI ( ((weight or overweight or obes*) N5 (program* or service? or intervention?)) ) OR AB ( ((weight or overweight or obes*) N5 (program* or service? or intervention?)) )          |
| S5  | (MH "Diet, Reducing") OR (MH "Diet Therapy")                                                                                                                                                                                                                                                                                                                                                                                                                                  |
| S4  | (MH "Weight Loss") OR (MH "Weight Reduction Programs")                                                                                                                                                                                                                                                                                                                                                                                                                        |
| S3  | S1 OR S2                                                                                                                                                                                                                                                                                                                                                                                                                                                                      |
| S2  | TI ( "fatty liver" or steatohepatitis ) OR AB ( ((nonalcoholic or non-alcoholic) N5 ("fatty liver" or steatohepatitis)) ) OR TI ( nafld or nash ) OR AB ( nafld or nash )                                                                                                                                                                                                                                                                                                     |
| S1  | (MM "Fatty Liver") OR (MH "Nonalcoholic Fatty Liver Disease")                                                                                                                                                                                                                                                                                                                                                                                                                 |

## Cochrane

| ID  | Search                                                                                                                                                                                                                                                                                |
|-----|---------------------------------------------------------------------------------------------------------------------------------------------------------------------------------------------------------------------------------------------------------------------------------------|
| #1  | MeSH descriptor: [Non-alcoholic Fatty Liver Disease] explode all trees                                                                                                                                                                                                                |
| #2  | ((nonalcoholic or non-alcoholic) near (fatty liver or steatohepatitis)):ti,ab,kw or fatty liver or steatohepatitis:ti or nafld or nash:ti,ab,kw (Word variations have been searched)                                                                                                  |
| #3  | #1 or #2                                                                                                                                                                                                                                                                              |
| #4  | weight or obes* or overweight or bariatric*:ti,ab,kw (Word variations have been searched)                                                                                                                                                                                             |
| #5  | MeSH descriptor: [Weight Loss] this term only                                                                                                                                                                                                                                         |
| #6  | MeSH descriptor: [Weight Reduction Programs] explode all trees                                                                                                                                                                                                                        |
| #7  | MeSH descriptor: [Diet Therapy] this term only                                                                                                                                                                                                                                        |
| #8  | MeSH descriptor: [Diet, Reducing] explode all trees                                                                                                                                                                                                                                   |
| #9  | MeSH descriptor: [Caloric Restriction] explode all trees                                                                                                                                                                                                                              |
| #10 | (weight near/3 (loss or lose or lost or losing or chang* or reduc* or manag*)):ti,ab,kw or ((energy or calori*) near/2 (reduc* or restrict)):ti,ab,kw or ((weight or overweight or obes*) near (program* or service? or intervention?)):ti,ab,kw (Word variations have been searched) |
| #11 | MeSH descriptor: [Anti-Obesity Agents] explode all trees                                                                                                                                                                                                                              |
| #12 | ((weight or overweight or obes*) near/3 (therap* or treat* or drug? or agent?)):ti,ab,kw (Word variations have been searched)                                                                                                                                                         |
| #13 | MeSH descriptor: [Bariatric Surgery] explode all trees                                                                                                                                                                                                                                |

|     |                                                                                                                                                                                                                                                                                                                                                     |
|-----|-----------------------------------------------------------------------------------------------------------------------------------------------------------------------------------------------------------------------------------------------------------------------------------------------------------------------------------------------------|
| #14 | bariatric*.ti or ((weight loss or bariatric or obes*) near surg*):ti,ab,kw or (((gastric or jejunoileal) near/3 (band* or bypass* or balloon* or diver*)) or gastrectom* or gastroplast* or ((biliopancreatic or bilio-pancreatic) near/2 diver*)):ti,ab,kw or ((obes* or overweight) near/3 manage*):ti,ab,kw (Word variations have been searched) |
| #15 | MeSH descriptor: [Obesity] explode all trees                                                                                                                                                                                                                                                                                                        |
| #16 | MeSH descriptor: [Obesity Management] explode all trees                                                                                                                                                                                                                                                                                             |
| #17 | #4 or #5 or #6 or #7 or #8 or #9 or #10 or #11 or #12 or #13 or #14 or #15 or #16                                                                                                                                                                                                                                                                   |
| #18 | #3 and #17                                                                                                                                                                                                                                                                                                                                          |

## WoS

|     |                                                                                                                                                                                                                                                                  |
|-----|------------------------------------------------------------------------------------------------------------------------------------------------------------------------------------------------------------------------------------------------------------------|
| Set | Save search history and/or create an alertOpen a saved search history                                                                                                                                                                                            |
| # 9 | #8 AND #7                                                                                                                                                                                                                                                        |
| # 8 | TOPIC: ((random* or blind* or allocat* or assign* or trial* or crossover* or cross-over*))                                                                                                                                                                       |
| # 7 | #6 AND #1                                                                                                                                                                                                                                                        |
| # 6 | #5 OR #4 OR #3 OR #2                                                                                                                                                                                                                                             |
| # 5 | TOPIC: (((obes* or overweight) NEAR/3 manage*))                                                                                                                                                                                                                  |
| # 4 | TOPIC: (((weight loss or bariatric or obes*) NEAR5 surg*)) OR TOPIC: (bariatric*) OR TOPIC: (((gastric or jejunoileal) NEAR/3 (band* or bypass* or balloon* or diver*)) or gastrectom* or gastroplast* or ((biliopancreatic or bilio-pancreatic) NEAR/2 diver*)) |
| # 3 | TOPIC: (((weight or overweight or obes*) NEAR/3 (therap* or treat* or drug? or agent?)))                                                                                                                                                                         |
| # 2 | TOPIC: ((weight NEAR/3 (loss or lose or lost or losing or chang* or reduc* or manag*))) OR TOPIC: (((energy or calori*) NEAR/2 (reduc* or restrict))) OR TOPIC: (((weight or overweight or obes*) NEAR/5 (program* or service? or intervention?)))               |
| # 1 | TOPIC: (((nonalcoholic or non-alcoholic) NEAR/5 ("fatty liver" or steatohepatitis))) OR TITLE: ("fatty liver" or steatohepatitis) OR TOPIC: (nafld OR nash)                                                                                                      |

## Trial Registers

|                                                                                                                                                                                                                                                     |
|-----------------------------------------------------------------------------------------------------------------------------------------------------------------------------------------------------------------------------------------------------|
| <b>ClinicalTrials.gov</b>                                                                                                                                                                                                                           |
| Other terms=(obesity OR obesity OR weight OR overweight OR bariatric OR bariatrics) AND Condition=("nonalcoholic fatty liver" OR "non alcoholic fatty liver" OR "nonalcoholic steatohepatitis" OR "non-alcoholic steatohepatitis" OR nafld OR nash) |
| <b>WHO ICTRP</b>                                                                                                                                                                                                                                    |
| nonalcoholic fatty liver AND obese OR non alcoholic fatty liver AND obese OR nonalcoholic steatohepatitis AND obese OR non-alcoholic steatohepatitis AND obese OR nafld AND obese OR nash AND obese                                                 |
| nonalcoholic fatty liver AND obesity OR non alcoholic fatty liver AND obesity OR nonalcoholic steatohepatitis AND obesity OR non-alcoholic steatohepatitis AND obesity OR nafld AND obesity OR nash AND obesity                                     |
| nonalcoholic fatty liver AND overweight OR non alcoholic fatty liver AND overweight OR nonalcoholic steatohepatitis AND overweight OR non-alcoholic steatohepatitis AND overweight OR nafld AND overweight OR nash AND overweight                   |
| nonalcoholic fatty liver AND weight OR non alcoholic fatty liver AND weight OR nonalcoholic steatohepatitis AND weight OR non-alcoholic steatohepatitis AND weight OR nafld AND weight OR nash AND weight                                           |
| nonalcoholic fatty liver AND bariatric OR non alcoholic fatty liver AND bariatric OR nonalcoholic steatohepatitis AND bariatric OR non-alcoholic steatohepatitis AND bariatric OR nafld AND bariatric OR nash AND bariatric                         |
| nonalcoholic fatty liver AND bariatrics OR non alcoholic fatty liver AND bariatrics OR nonalcoholic steatohepatitis AND bariatrics OR non-alcoholic steatohepatitis AND bariatrics OR nafld AND bariatrics OR nash AND bariatrics                   |
